# Supplementary material for: Coherence lifetime broadened optical transitions in a 2 atom diameter HgTe nanowire: a temperature dependent resonance Raman study
Source: Royal Society of Chemistry journal article supplement (doi:10.1039/c6ra22065g), 2016-01-01
Supplement: c6ra22065g1.zip [file c6ra22065g1.zip]

## Sheet: Info
Supplementary Material for PRB paper
The Data contained in this spreadsheet contains the Data acquired for Temperature dependent measurments of HgTe filled nanotubes using
Raman Spectroscopy. These results have been obtained followin fitting of the Raman spectra using two lorenztians and a background function.
The data obtained for these fitted spectra is then included in the following sheets including the upper and lower confidence bands of the fit.
Format of Spreadsheets
Each sheet contains a specific temperature e.g 4K
The following headings are then used for the data sets.
Temperature	Filter	Mode	Data Type
4K	ORD	A and B	PeakData
The filter denotes if Volume Bragg Gratings have been used (VBG) or our tuneable filter (ORD), in this sheet the data has been obtained using our Ti:Saph Laser
Mode denotes the assigned letter given to the Raman feature of HgTe modes shown in PRB paper.
Data Type indicates if the data set is the Peakdata or Upper and Lower Confidence Bands from fitting process.
Wavelength		Wavelength given in nanometers
Intensity A		Intensity of the first fitted peak
Intensity B		Intensity of the second fitted peak
Background 1		Constant from applied linear fit for the background
Background 2		Gradient of the applied linear fit for the background
A Peak Width		Width of the first peak
B Peak Width		Width of the second peak
A Peak Centre Shift		Central Raman shift of the first peak
B Peak Centre Shift		Central Raman shift of the second peak

## Sheet: 4K Data
Temperature	Filter	Mode	Data Type
4K	ORD	A and B	PeakData
Wavelength	700.51	702.16	704.27	706.32	708.23	710.21	712.2	716.3	720.28	725.28
Intensity A	26.2035	24.7434	26.5003	30.457	31.6268	32.0047	19.1279	22.1036	13.0561	9.69527
Intensity B	205.383	213.632	153.872	134.777	117.818	83.4764	35.5182	26.1339	7.59491	2.9723
Background 1	0.854261	0.452241	5.03557	1.07533	1.36971	-0.0977263	0.545043	1.12041	1.74223	1.3853
Background 2	0.0149166	0.00550891	-0.0614426	0.0187226	0.00905254	0.0430522	0.000531061	-0.00810107	-0.0172411	-0.0156737
A Peak Width	0.592077	0.525952	0.546298	0.585431	0.617322	0.634556	0.569856	0.585063	0.481043	0.54766
B Peak Width	0.495159	0.473906	0.526799	0.529605	0.525946	0.484366	0.507524	0.49469	0.374421	0.360587
A Peak Centre Shift	46.6708	46.4249	46.3148	45.92	45.4988	45.8562	45.8675	45.7254	46.1127	45.9961
B Peak Centre Shift	51.8554	51.6316	51.5171	51.1589	50.7169	50.9506	51.0784	50.9304	51.3471	51.2062
4K	ORD	A and B	Confidence Band Upper
Wavelength	700.51	702.16	704.27	706.32	708.23	710.21	712.2	716.3	720.28	725.28
Intensity A	28.9219	27.9893	40.3889	33.7591	33.1914	37.5818	19.7376	22.6494	23.8968	14.9964
Intensity B	208.362	217.062	167.865	138.274	119.514	89.7801	36.162	26.7234	19.3541	9.31902
Background 1	1.51888	1.2335	8.55832	1.89111	1.78251	1.45092	0.695165	1.26818	4.32235	2.72391
Background 2	0.0297288	0.0223931	0.0120488	0.0374404	0.0181786	0.0761564	0.00409254	-0.00484595	0.0435207	0.0176939
A Peak Width	0.682244	0.626236	0.965447	0.678444	0.662144	0.79718	0.596505	0.606245	1.06425	0.98818
B Peak Width	0.505722	0.485022	0.596702	0.549924	0.537072	0.537658	0.521071	0.511026	1.20942	1.47945
A Peak Centre Shift	46.7319	46.4948	46.599	45.9837	45.5294	45.9664	45.8857	45.7399	46.5113	46.2967
B Peak Centre Shift	51.8625	51.6393	51.5656	51.1724	50.7245	50.9879	51.0877	50.9417	51.9783	52.028
4K	ORD	A and B	Confidence Bands Lower
Wavelength	700.51	702.16	704.27	706.32	708.23	710.21	712.2	716.3	720.28	725.28
Intensity A	23.4852	21.4976	12.6117	27.1548	30.0622	26.4276	18.5182	21.5579	2.21543	4.39412
Intensity B	202.405	210.202	139.88	131.281	116.122	77.1727	34.8744	25.5445	-4.16432	-3.37442
Background 1	0.189645	-0.329014	1.51283	0.259561	0.956901	-1.64637	0.39492	0.972629	-0.837886	0.0466969
Background 2	0.000104417	-0.0113752	-0.134934	4.76648e-06	-7.35599e-05	0.00994802	-0.00303042	-0.0113562	-0.0780029	-0.0490414
A Peak Width	0.501911	0.425668	0.12715	0.492419	0.5725	0.471932	0.543207	0.56388	-0.102161	0.10714
B Peak Width	0.484596	0.46279	0.456897	0.509286	0.514821	0.431074	0.493976	0.478354	-0.460581	-0.758275
A Peak Centre Shift	46.6097	46.3549	46.0305	45.8563	45.4681	45.746	45.8493	45.711	45.7142	45.6956
B Peak Centre Shift	51.8482	51.6239	51.4685	51.1453	50.7093	50.9133	51.0691	50.9191	50.7159	50.3843
4K	VBG	A and B	PeakData
Wavelength	690.19	692.15	694.11	696.17	698.17	700.25	702.26	704.23	706.24	708.21	710.21	712.3	714.39	716.24
Intensity A	2.14056	5.7437	8.84272	10.5265	16.3062	2.02903	17.8546	18.6753	23.3403	23.5106	22.1118	28.7496	25.0993	16.884
Intensity B	90.2936	112.765	139.562	154.475	218.75	202.699	187.429	171.463	128.407	88.9329	56.4951	57.4907	34.1694	16.0206
Background 1	-0.21137	-0.00225145	-0.897021	0.12558	0.288854	-0.408661	0.316252	0.00274035	0.747435	0.666339	0.345895	0.486123	0.452962	0.221298
Background 2	0.00454273	0.00376551	0.0343987	0.00278616	0.00492877	0.0126681	0.00483187	0.00809712	0.00498117	0.00442521	0.000253005	-0.000393701	-0.0018406	0.000146778
A Peak Width	3.40512	0.49212	0.491864	0.493378	0.517053	6.76123	0.541706	0.79888	0.560312	0.548939	0.553446	0.548098	0.524986	0.564291
B Peak Width	0.60654	0.463934	0.475068	0.511145	0.477812	0.495699	0.516773	0.499774	0.482705	0.492256	0.511002	0.475082	0.476976	0.489613
A Peak Centre Shift	47	45.9071	46.1828	46.5961	46.8455	44	46.6793	46.5275	46.1264	45.9951	45.7584	45.7673	45.6022	45.8682
B Peak Centre Shift	51.3958	51.0783	51.3347	51.8264	52.0354	49.6025	51.8541	51.5391	51.3529	51.21	50.9721	50.9788	50.8136	51.0782
4K	VBG	A and B	Upper Confidence Band
Wavelength	690.19	692.15	694.11	696.17	698.17	700.25	702.26	704.23	706.24	708.21	710.21	712.3	714.39	716.24
Intensity A	3.34718	8.00608	12.9551	14.5557	20.1935	3.93367	20.9393	21.9307	25.2249	25.2127	23.213	29.726	25.8567	17.4055
Intensity B	93.1556	115.19	143.886	158.425	222.821	207.973	190.57	175.559	130.461	90.7461	57.6347	58.5409	34.9565	16.5786
Background 1	1.15153	0.871346	0.550327	1.57092	1.79845	2.89916	1.50323	1.62738	1.46602	1.33733	0.804111	0.858603	0.749419	0.441077
Background 2	0.0265779	0.019251	0.0623944	0.029876	0.0323708	0.0600907	0.027578	0.0380089	0.0195729	0.0176044	0.00895682	0.00738914	0.00413712	0.00445099
A Peak Width	7.86034	0.775986	0.824762	0.772389	0.69918	20.8184	0.680008	1.00964	0.626976	0.607544	0.594215	0.575491	0.548278	0.590116
B Peak Width	0.641548	0.478631	0.49673	0.530404	0.490892	0.517981	0.529505	0.517306	0.494111	0.507069	0.526106	0.487871	0.493028	0.514645
A Peak Centre Shift	49.4765	46.1071	46.4183	46.7799	46.9673	50.5757	46.7718	46.6667	46.1717	46.0347	45.7859	45.7859	45.6181	45.8855
B Peak Centre Shift	51.4148	51.0878	51.3489	51.8392	52.044	49.6155	51.8627	51.5511	51.3604	51.2198	50.9825	50.9874	50.8248	51.0953
4K	VBG	A and B	Lower Confidence Band
Wavelength	690.19	692.15	694.11	696.17	698.17	700.25	702.26	704.23	706.24	708.21	710.21	712.3	714.39	716.24
Intensity A	0.933947	3.48132	4.73034	6.49721	12.4189	0.124383	14.7698	15.4198	21.4556	21.8085	21.0106	27.7731	24.3419	16.3624
Intensity B	87.4317	110.34	135.238	150.526	214.678	197.425	184.287	167.366	126.353	87.1197	55.3554	56.4406	33.3822	15.4626
Background 1	-1.57427	-0.875849	-2.34437	-1.31976	-1.22074	-3.71648	-0.87073	-1.6219	0.0288469	-0.0046543	-0.112321	0.113643	0.156505	0.00151927
Background 2	-0.0174924	-0.01172	0.00640309	-0.0243036	-0.0225133	-0.0347545	-0.0179143	-0.0218146	-0.00961053	-0.00875401	-0.00845081	-0.00817654	-0.00781832	-0.00415743
A Peak Width	-1.05009	0.208254	0.158967	0.214367	0.334927	-7.29598	0.403404	0.588119	0.493647	0.490334	0.512677	0.520705	0.501693	0.538467
B Peak Width	0.571532	0.449236	0.453406	0.491887	0.464731	0.473416	0.504041	0.482241	0.471299	0.477443	0.495898	0.462293	0.460925	0.464581
A Peak Centre Shift	44.5235	45.7071	45.9473	46.4124	46.7236	37.4244	46.5868	46.3884	46.0812	45.9554	45.7308	45.7487	45.5863	45.8508
B Peak Centre Shift	51.3768	51.0687	51.3205	51.8137	52.0267	49.5895	51.8454	51.5271	51.3453	51.2001	50.9617	50.9701	50.8024	51.0611
4K	ORD	2A and 2B	PeakData
Wavelength	700.51	702.16	704.27	706.32	708.23	710.21	712.2	716.3	720.28	725.28
Intensity A	9.40531	7.34148	8.47823	9.51938	9.27739	8.4948	5.21178	5.72442	3.0676	1.70552
Intensity B	61.1402	65.3575	47.2275	38.1286	32.2097	20.7925	8.83832	5.67531	1.90618	0.518852
Background 1	-0.917757	-4.42977	0.330872	0.337751	-0.774145	-16.031	0.157262	0.26048	0.0222508	-0.0117664
Background 2	0.0331706	0.0673026	0.0159989	0.0168086	0.033679	0.209267	0.00551249	0.00525157	0.00350234	0.00351568
A Peak Width	1.85485	1.45462	1.84251	1.6074	1.45777	0.72335	1.07439	1.0424	0.969668	1.133
B Peak Width	0.723558	0.923987	0.745478	0.778976	0.741746	0.441698	0.761735	0.84907	0.55097	1.77839
A Peak Centre Shift	91.8857	91.7044	91.582	91.3109	90.8865	91.2291	91.4041	91.3046	91.7025	91.6605
B Peak Centre Shift	102.689	102.397	102.348	101.99	101.514	101.788	101.955	101.697	102.224	101.541
4K	ORD	2A and 2B	Upper Confidence Band
Wavelength	700.51	702.16	704.27	706.32	708.23	710.21	712.2	716.3	720.28	725.28
Intensity A	10.8998	12.8346	8.98393	10.0467	11.9628	25.9987	5.53519	6.04945	3.31125	1.92061
Intensity B	63.5212	72.2268	48.0182	38.8833	35.9613	42.8188	9.22155	6.03481	2.22915	0.691049
Background 1	0.6097	0.596424	0.89198	0.827307	1.67809	-4.94116	0.395878	0.510599	0.197314	0.160104
Background 2	0.0473917	0.113989	0.0210916	0.0215407	0.0571162	0.31609	0.00792982	0.007722	0.00531843	0.00543769
A Peak Width	2.32865	3.16709	2.02228	1.74731	2.11914	2.94768	1.1751	1.13222	1.08522	1.34972
B Peak Width	0.76505	1.06845	0.763893	0.801788	0.869189	1.11635	0.810757	0.92913	0.688448	2.74563
A Peak Centre Shift	92.18	92.7915	91.6917	91.3998	91.3081	92.7197	91.4707	91.3637	91.7795	91.8034
B Peak Centre Shift	102.718	102.494	102.361	102.005	101.601	102.27	101.988	101.75	102.318	102.131
4K	ORD	2A and 2B	Lower Confidence Band
Wavelength	700.51	702.16	704.27	706.32	708.23	710.21	712.2	716.3	720.28	725.28
Intensity A	7.91083	1.84838	7.97253	8.99206	6.59196	-9.0091	4.88837	5.39939	2.82395	1.49043
Intensity B	58.7592	58.4883	46.4368	37.3739	28.4582	-1.23385	8.45509	5.31581	1.58321	0.346655
Background 1	-2.44521	-9.45596	-0.230237	-0.151805	-3.22638	-27.1209	-0.0813544	0.0103604	-0.152812	-0.183636
Background 2	0.0189494	0.0206158	0.0109061	0.0120764	0.0102418	0.102444	0.00309516	0.00278114	0.00168625	0.00159368
A Peak Width	1.38104	-0.257859	1.66274	1.46748	0.796403	-1.50098	0.973674	0.952577	0.854115	0.916287
B Peak Width	0.682067	0.779525	0.727063	0.756165	0.614303	-0.232949	0.712714	0.769009	0.413492	0.811151
A Peak Centre Shift	91.5913	90.6172	91.4723	91.2219	90.4648	89.7384	91.3374	91.2454	91.6256	91.5176
B Peak Centre Shift	102.661	102.3	102.336	101.975	101.428	101.305	101.922	101.643	102.131	100.952
4K	VBG	2A and 2B	Peak Data
Wavelength	690.19	692.15	694.11	696.17	698.17	700.25	702.26	704.23	706.24	708.21	710.21	712.3	714.39	716.24
Intensity A	2.14112	2.50751	3.4901	3.82619	5.13493	5.59062	6.09775	5.79865	7.04837	6.19753	6.34393	7.41956	6.23967	4.43382
Intensity B	34.0182	38.7549	46.9195	55.8371	75.054	73.2611	67.9309	56.7136	37.0112	25.5569	15.7204	14.8374	8.56932	3.81879
Background 1	-1.40913	-1.82547	0.0705641	-0.612683	3.23995	-0.580303	-0.313885	-0.344299	-1.11316	-0.0565529	-0.00467718	-0.35948	-0.210332	-0.129491
Background 2	0.0198684	0.0237012	0.00957689	0.0147849	-0.0117767	0.0179375	0.0158725	0.014684	0.0223838	0.0113365	0.00693862	0.0112964	0.00802809	0.00545619
A Peak Width	2.55211	2.44781	1.99459	2.1616	1.40027	2.00222	1.8537	1.79057	2.72357	1.5348	0.924942	0.979351	0.964838	0.877528
B Peak Width	0.798829	0.614104	0.632095	0.625814	0.645538	0.665457	0.675081	0.687102	0.706793	0.699918	0.707546	0.672395	0.654521	0.636034
A Peak Centre Shift	91.5994	91.2475	91.7478	91.7306	91.9356	89.2931	91.7848	91.5736	89.9861	91.4651	91.3519	91.3812	91.198	91.4908
B Peak Centre Shift	102.211	101.961	102.219	102.724	102.964	100.544	102.805	102.49	102.261	102.123	101.931	101.934	101.76	102.006
4K	VBG	2A and 2B	Upper Confidence Band
Wavelength	690.19	692.15	694.11	696.17	698.17	700.25	702.26	704.23	706.24	708.21	710.21	712.3	714.39	716.24
Intensity A	2.64162	2.9524	4.03124	4.23341	8.06804	6.11461	6.65623	6.36066	8.87499	6.58943	6.7105	7.79893	6.52602	4.70659
Intensity B	34.8979	39.6291	47.8729	56.5892	79.3543	74.1638	68.8515	57.6157	40.557	26.135	16.1388	15.2943	8.9166	4.13859
Background 1	-0.702613	-1.17042	0.65884	-0.121893	6.00723	0.0101069	0.278785	0.267315	1.28546	0.308969	0.261036	-0.0925561	-0.00436285	0.0614514
Background 2	0.0258945	0.0292366	0.0148831	0.0191353	0.0129786	0.0233581	0.0213263	0.0202456	0.0448215	0.0148338	0.00948496	0.0140004	0.0100869	0.00734906
A Peak Width	3.60307	3.22155	2.50182	2.54805	2.67486	2.3129	2.12878	2.07332	3.93081	1.68728	1.00586	1.05458	1.03154	0.958534
B Peak Width	0.829488	0.634496	0.650893	0.638176	0.699784	0.677493	0.688514	0.703167	0.806794	0.723224	0.735284	0.702944	0.693592	0.714431
A Peak Centre Shift	92.1922	91.6777	92.0565	91.96	92.7345	89.4804	91.9544	91.7469	90.6907	91.5621	91.4053	91.4313	91.2423	91.5448
B Peak Centre Shift	102.231	101.975	102.232	102.733	103.001	100.553	102.814	102.501	102.329	102.139	101.95	101.954	101.786	102.059
4K	VBG	2A and 2B	Lower Confidence Band
Wavelength	690.19	692.15	694.11	696.17	698.17	700.25	702.26	704.23	706.24	708.21	710.21	712.3	714.39	716.24
Intensity A	1.64063	2.06263	2.94896	3.41896	2.20182	5.06662	5.53928	5.23665	5.22176	5.80563	5.97736	7.04019	5.95331	4.16105
Intensity B	33.1384	37.8807	45.9661	55.085	70.7537	72.3584	67.0102	55.8116	33.4654	24.9788	15.3021	14.3805	8.22205	3.49898
Background 1	-2.11565	-2.48053	-0.517711	-1.10347	0.472664	-1.17071	-0.906556	-0.955913	-3.51177	-0.422075	-0.270391	-0.626405	-0.416301	-0.320433
Background 2	0.0138424	0.0181658	0.00427064	0.0104344	-0.036532	0.0125169	0.0104188	0.00912235	-5.38688e-05	0.00783931	0.00439229	0.00859246	0.00596928	0.00356333
A Peak Width	1.50115	1.67406	1.48736	1.77515	0.125672	1.69154	1.57862	1.50781	1.51634	1.38232	0.844024	0.904119	0.89814	0.796522
B Peak Width	0.768169	0.593712	0.613297	0.613452	0.591291	0.65342	0.661648	0.671037	0.606793	0.676611	0.679808	0.641846	0.61545	0.557637
A Peak Centre Shift	91.0067	90.8172	91.4391	91.5012	91.1366	89.1059	91.6153	91.4004	89.2816	91.3682	91.2984	91.3312	91.1537	91.4368
B Peak Centre Shift	102.19	101.948	102.206	102.716	102.927	100.536	102.796	102.479	102.193	102.107	101.912	101.913	101.733	101.953
4K	ORD	2A+B and 3B	PeakData
Wavelength	700.51	702.16	704.27	706.32	708.23	710.21	712.2	716.3	720.28	725.28
Intensity A	19.9942	22.4361	15.2663	12.0592	9.95957	5.26271	3.12455	2.6104	1.13553	0.666826
Intensity B	20.3048	23.3056	14.9267	11.6651	9.6898	6.2969	2.52927	1.47562	0.494162	0.0666014
Background 1	0.0785622	3.3657	-1.47842	1.25738	2.23587	17.9106	1.385	-0.120618	-0.0356973	-0.317755
Background 2	0.0234515	-0.00115817	0.0289459	0.0104094	0.0058292	-0.0888992	-0.00258406	0.00809905	0.00470622	0.00703372
A Peak Width	2.35577	1.70912	2.57735	2.95206	3.13077	1.11456	3.91187	5.09124	4.21024	3.06086
B Peak Width	0.930053	0.860435	0.966195	0.99978	0.869773	0.403644	0.821019	0.496427	0.100379	0.100089
A Peak Centre Shift	141.851	141.368	141.433	141.153	140.769	141.021	141.666	142.042	143.666	143.991
B Peak Centre Shift	153.523	153.477	153.19	152.785	152.315	152.655	152.807	152.461	152.58	152.298
4K	ORD	2A+B and 3B	Upper Confidence Band
Wavelength	700.51	702.16	704.27	706.32	708.23	710.21	712.2	716.3	720.28	725.28
Intensity A	21.2828	25.7958	15.9459	12.638	11.5316	17.2379	3.59983	2.78271	1.33204	0.853707
Intensity B	22.3438	28.025	16.0298	12.6512	12.6443	26.8071	3.55322	2.01801	14.1403	2.02654
Background 1	1.33554	6.18053	-0.751976	1.89191	4.05333	26.1105	1.984	0.138347	0.225786	-0.101295
Background 2	0.0316289	0.0171823	0.0336102	0.0146571	0.0178817	-0.0338589	0.00156993	0.00985708	0.00660907	0.00867929
A Peak Width	2.59361	2.09876	2.76015	3.18059	3.9368	4.87409	4.9253	5.70858	5.48311	4.48957
B Peak Width	1.06774	1.11567	1.07176	1.12591	1.26326	2.31812	1.3209	0.769458	2.28055	3.67795
A Peak Centre Shift	142.003	141.623	141.547	141.294	141.263	143.557	142.264	142.385	144.4	144.849
B Peak Centre Shift	153.617	153.651	153.262	152.87	152.58	153.894	153.139	152.644	153.352	159.307
4K	ORD	2A+B and 3B	Lower Confidence Band
Wavelength	700.51	702.16	704.27	706.32	708.23	710.21	712.2	716.3	720.28	725.28
Intensity A	18.7057	19.0763	14.5866	11.4805	8.3875	-6.71247	2.64926	2.43809	0.939015	0.479944
Intensity B	18.2657	18.5863	13.8236	10.679	6.73532	-14.2133	1.50532	0.933231	-13.152	-1.89334
Background 1	-1.17842	0.55086	-2.20487	0.622836	0.4184	9.71065	0.785988	-0.379583	-0.297181	-0.534215
Background 2	0.0152741	-0.0194986	0.0242816	0.00616166	-0.00622332	-0.14394	-0.00673805	0.00634102	0.00280337	0.00538815
A Peak Width	2.11794	1.31948	2.39454	2.72353	2.32474	-2.64496	2.89843	4.47389	2.93737	1.63216
B Peak Width	0.792369	0.605199	0.860635	0.873652	0.47629	-1.51084	0.321138	0.223396	-2.07979	-3.47777
A Peak Centre Shift	141.699	141.112	141.318	141.011	140.274	138.485	141.067	141.699	142.931	143.133
B Peak Centre Shift	153.43	153.302	153.119	152.701	152.049	151.417	152.474	152.278	151.808	145.29
4K	VBG	2A+B and 3B	Peak Data
Wavelength	690.19	692.15	694.11	696.17	698.17	700.25	702.26	704.23	706.24	708.21	710.21	712.3	714.39	716.24
Intensity A	13.1953	11.9388	15.3873	20.5311	28.989	29.1625	23.836	19.6329	11.7311	7.93854	5.26715	5.67602	3.77316	2.13583
Intensity B	14.1003	14.4645	17.3761	21.9048	29.4373	29.1648	24.3628	20.1034	11.7427	7.02835	5.21081	3.99983	2.6471	1.0841
Background 1	-2.32866	-1.83466	-1.46425	-1.84667	-1.97155	-1.45099	-1.58941	-1.01244	-0.543376	-1.17787	-1.34878	-0.796299	-0.7988	-0.40915
Background 2	0.0201551	0.0171983	0.0180686	0.0207093	0.0257903	0.0223029	0.0238736	0.0182764	0.0158105	0.0173605	0.0151155	0.0120323	0.0105901	0.00662382
A Peak Width	2.65044	2.43504	2.29431	1.89979	1.71602	1.54493	1.65579	1.6749	2.35332	3.04387	3.60913	3.93053	4.50175	5.01146
B Peak Width	0.941116	0.767643	0.837264	0.841177	0.869787	0.888228	0.940044	0.976766	0.988318	1.05759	0.788507	0.860183	0.630611	0.465524
A Peak Centre Shift	142.168	141.695	141.648	141.768	141.888	139.318	141.45	141.143	141.194	141.225	141.201	141.585	141.865	142.515
B Peak Centre Shift	153.067	152.865	153.105	153.612	153.898	151.475	153.747	153.408	153.149	153.006	152.797	152.823	152.655	153.081
4K	VBG	2A+B and 3B	Peak Data
Wavelength	690.19	692.15	694.11	696.17	698.17	700.25	702.26	704.23	706.24	708.21	710.21	712.3	714.39	716.24
Intensity A	13.5225	12.2681	15.7997	21.0383	29.615	29.8352	24.5586	20.3048	12.2225	8.30866	5.5402	5.93353	3.97064	2.28159
Intensity B	14.6426	15.0443	18.054	22.6633	30.3129	30.0493	25.3186	20.9803	12.4955	7.64809	5.78465	4.53574	3.1585	1.54874
Background 1	-1.72532	-1.23177	-0.81177	-1.1085	-1.09162	-0.590925	-0.623393	-0.0881235	0.236719	-0.494747	-0.788899	-0.257426	-0.356637	-0.0620914
Background 2	0.023893	0.0209177	0.0222966	0.0254942	0.0314807	0.0280905	0.0303912	0.0244675	0.0213007	0.0221143	0.0189422	0.0160084	0.0138117	0.00914421
A Peak Width	2.76303	2.54946	2.3947	1.9748	1.77476	1.60042	1.73413	1.76481	2.51237	3.28325	3.93769	4.24913	4.9422	5.676
B Peak Width	0.995197	0.813092	0.885763	0.884411	0.908252	0.928459	0.995559	1.04095	1.08545	1.20159	0.919848	1.03976	0.816401	0.767019
A Peak Centre Shift	142.233	141.762	141.709	141.815	141.925	139.354	141.5	141.2	141.292	141.367	141.388	141.763	142.101	142.86
B Peak Centre Shift	153.103	152.896	153.138	153.642	153.924	151.501	153.784	153.451	153.213	153.1	152.884	152.938	152.776	153.277
4K	VBG	2A+B and 3B	Peak Data
Wavelength	690.19	692.15	694.11	696.17	698.17	700.25	702.26	704.23	706.24	708.21	710.21	712.3	714.39	716.24
Intensity A	12.8681	11.6095	14.9749	20.0239	28.363	28.4897	23.1134	18.961	11.2397	7.56841	4.9941	5.4185	3.57569	1.99007
Intensity B	13.558	13.8846	16.6982	21.1462	28.5616	28.2803	23.407	19.2266	10.9899	6.40861	4.63698	3.46392	2.1357	0.619472
Background 1	-2.93201	-2.43755	-2.11673	-2.58484	-2.85149	-2.31105	-2.55543	-1.93675	-1.32347	-1.86099	-1.90867	-1.33517	-1.24096	-0.756209
Background 2	0.0164171	0.0134789	0.0138406	0.0159244	0.0200998	0.0165153	0.017356	0.0120853	0.0103202	0.0126067	0.0112887	0.00805626	0.00736839	0.00410344
A Peak Width	2.53786	2.32061	2.19392	1.82478	1.65727	1.48944	1.57745	1.58499	2.19428	2.80449	3.28057	3.61192	4.0613	4.34692
B Peak Width	0.887035	0.722195	0.788766	0.797942	0.831323	0.847998	0.884529	0.912585	0.891181	0.913583	0.657166	0.680608	0.44482	0.164028
A Peak Centre Shift	142.102	141.628	141.587	141.721	141.851	139.283	141.4	141.086	141.095	141.084	141.013	141.407	141.628	142.17
B Peak Centre Shift	153.031	152.834	153.072	153.583	153.872	151.448	153.71	153.365	153.086	152.913	152.71	152.708	152.533	152.885

## Sheet: 25K
Temperature	Filter	Mode	Data Type
25K	ORD	A and B	PeakData
Wavelength	700.47	702.32	704.43	706.32	708.45	710.53	712.36	714.5	716.28	718.4	720.35	722.35	725.45	730.35	735.35	740.47	745.26
Intensity A	21.6285	25.03	25.7788	25.8494	35.6275	33.8527	30.6423	24.8155	26.999	41.9203	36.5575	32.4156	28.5281	32.1692	32.3572	21.3085	8.6218
Intensity B	237.438	235.645	185.869	152.462	138.43	91.8778	62.776	33.8	25.2281	26.6166	18.0038	11.4344	6.29642	3.70929	2.45654	1.20932	0.501591
Background 1	0.498006	1.43018	1.58892	0.953664	1.11834	0.921736	0.588677	0.445976	0.409643	0.71576	0.717619	0.638132	0.680991	0.323218	0.909362	0.944618	0.427937
Background 2	0.00934919	0.00390297	-0.00118794	0.00624144	0.00416569	0.00127341	0.00357268	0.00119698	-0.000434189	-0.000822509	-0.000450079	-0.00189628	-0.00339238	0.0110961	-0.000734314	-0.00513927	-0.00274107
A Peak Width	0.558472	0.577147	0.585878	0.576388	0.572526	0.574428	0.605377	0.576672	0.58428	0.575131	0.619557	0.585531	0.5802	0.560165	0.570312	0.572825	0.560312
B Peak Width	0.494567	0.517852	0.505332	0.514875	0.506944	0.516103	0.507818	0.484297	0.481677	0.502083	0.502997	0.486803	0.479856	0.376571	0.478846	0.397499	0.380751
A Peak Centre Shift	46.4378	46.3244	46.2312	46.0627	45.9199	45.988	45.7693	46.0427	46.0223	45.7223	45.995	45.8183	46.207	46.4031	45.8554	45.58	45.5422
B Peak Centre Shift	51.6226	51.5274	51.428	51.288	51.1298	51.1997	50.9585	51.252	51.223	50.9098	51.1542	50.9867	51.3663	51.5559	51.0522	50.7742	50.5764
25K	ORD	A and B	Upper Confidence Bands
Wavelength	700.47	702.32	704.43	706.32	708.45	710.53	712.36	714.5	716.28	718.4	720.35	722.35	725.45	730.35	735.35	740.47	745.26
Intensity A	25.7525	29.021	28.7631	28.2723	37.9652	35.5273	31.8361	25.6603	27.6734	42.7963	37.1119	32.9672	29.0103	34.1155	32.8026	21.6911	8.96269
Intensity B	241.78	239.892	189.108	154.999	140.927	93.6373	64.0714	34.7266	25.9681	27.5543	18.6164	12.0343	6.8288	6.05067	2.94354	1.66303	0.916599
Background 1	2.29419	3.27833	3.07106	2.02777	2.21309	1.74891	1.13755	0.84398	0.743819	1.17311	0.987764	0.911763	0.937046	1.30723	1.13163	1.13344	0.610457
Background 2	0.0436084	0.0380687	0.0253082	0.0273103	0.024887	0.01643	0.0146525	0.0089682	0.00590503	0.00756163	0.00502217	0.00346348	0.00139936	0.0305684	0.00392339	-0.000947168	0.00100157
A Peak Width	0.715717	0.714016	0.687319	0.656583	0.628319	0.616917	0.640384	0.605811	0.606032	0.593149	0.633558	0.600388	0.594893	0.610511	0.581972	0.588128	0.593316
B Peak Width	0.507771	0.531646	0.518332	0.527455	0.520432	0.530644	0.523241	0.50387	0.50243	0.528159	0.528275	0.524328	0.539809	0.722318	0.62001	0.617313	0.844568
A Peak Centre Shift	46.5452	46.4164	46.2994	46.1165	45.9576	46.0164	45.793	46.0624	46.0369	45.7343	46.0044	45.8282	46.2167	46.4371	45.8632	45.5903	45.5643
B Peak Centre Shift	51.6318	51.5366	51.4367	51.2967	51.1389	51.2097	50.9691	51.2652	51.2372	50.9275	51.1714	51.0126	51.4064	51.8014	51.1466	50.927	50.8888
25K	ORD	A and B	Lower Confidence Bands
Wavelength	700.47	702.32	704.43	706.32	708.45	710.53	712.36	714.5	716.28	718.4	720.35	722.35	725.45	730.35	735.35	740.47	745.26
Intensity A	17.5044	21.0389	22.7945	23.4264	33.2898	32.1781	29.4486	23.9707	26.3246	41.0444	36.0031	31.8639	28.0459	30.223	31.9119	20.9258	8.28092
Intensity B	233.096	231.398	182.63	149.926	135.932	90.1184	61.4805	32.8734	24.488	25.6788	17.3912	10.8345	5.76405	1.36791	1.96955	0.755606	0.0865831
Background 1	-1.29818	-0.417973	0.106784	-0.120438	0.0235963	0.0945647	0.0398068	0.0479714	0.0754663	0.258406	0.447474	0.364501	0.424935	-0.66079	0.687094	0.7558	0.245416
Background 2	-0.02491	-0.0302628	-0.0276841	-0.0148274	-0.0165556	-0.0138831	-0.00750711	-0.00657425	-0.00677341	-0.00920664	-0.00592233	-0.00725604	-0.00818412	-0.00837623	-0.00539201	-0.00933136	-0.00648371
A Peak Width	0.401228	0.440278	0.484436	0.496193	0.516733	0.53194	0.57037	0.547533	0.562528	0.557113	0.605557	0.570674	0.565506	0.50982	0.558652	0.557522	0.527308
B Peak Width	0.481362	0.504058	0.492331	0.502295	0.493456	0.501561	0.492394	0.464723	0.460924	0.476006	0.477719	0.449277	0.419902	0.0308239	0.337682	0.177686	-0.0830662
A Peak Centre Shift	46.3305	46.2324	46.1631	46.0089	45.8821	45.9597	45.7457	46.023	46.0076	45.7103	45.9856	45.8083	46.1972	46.3691	45.8475	45.5697	45.5201
B Peak Centre Shift	51.6133	51.5182	51.4193	51.2793	51.1207	51.1898	50.9479	51.2388	51.2087	50.8922	51.137	50.9609	51.3263	51.3104	50.9578	50.6214	50.2639
25K	VBG	A and B	PeakData
Wavelength	690.88	692.16	694.26	696.23	698.3	699.93	702.57	704.21	706.37	708.4	710.3	712.39	714.31	716.47
Intensity A	4.00833	5.44381	6.82175	9.267	13.0189	14.1898	9.73994	18.0754	16.7239	23.1842	29.5591	21.5528	20.71	24.4098
Intensity B	108.252	116.21	137.692	133.712	218.835	167.989	136.653	156.088	101.027	95.8625	81.155	42.4768	29.5242	24.2465
Background 1	0.181287	0.230048	0.313123	0.0946947	0.574544	0.32429	0.228576	0.729841	0.553205	0.682989	0.957705	0.249436	0.502298	0.49965
Background 2	0.00295185	0.00273244	0.00183062	0.000889443	0.00383349	0.00635234	0.00416649	0.00206174	0.00244835	0.00200188	-0.000329339	0.0117398	-0.00047639	-0.00119445
A Peak Width	0.604902	0.587237	0.587365	0.525782	0.557682	0.543485	0.564986	0.559023	0.539101	0.579169	0.560419	0.531642	0.564684	0.580189
B Peak Width	0.55488	0.522671	0.617063	0.509648	0.498569	0.495383	0.52829	0.518059	0.519884	0.526195	0.483101	0.497438	0.498295	0.481379
A Peak Centre Shift	46.083	45.9756	46.1182	46.3196	46.8003	46.9441	46.755	46.3854	45.9626	45.9798	45.7339	45.6946	45.7861	45.9092
B Peak Centre Shift	51.2729	51.137	51.3411	51.4728	51.9861	52.124	51.9527	51.5862	51.1806	51.1894	50.9432	50.9027	50.9968	51.1098
25K	VBG	A and B	Upper Confidence Bands
Wavelength	690.88	692.16	694.26	696.23	698.3	699.93	702.57	704.21	706.37	708.4	710.3	712.39	714.31	716.47
Intensity A	6.13169	7.74977	9.93272	3.24493	16.8858	17.2053	12.034	20.4743	18.5938	24.8318	30.82	27.3822	21.3799	25.0281
Intensity B	110.475	118.623	140.717	38.0083	222.902	171.125	139.047	158.603	102.954	97.5797	82.5092	48.4763	30.232	24.9307
Background 1	1.05056	1.18769	1.49633	0.340045	2.15544	1.59007	1.14593	1.72504	1.2575	1.3546	1.48904	2.76602	0.772569	0.766274
Background 2	0.018629	0.0196676	0.0246048	0.00547263	0.0324705	0.0287506	0.0216583	0.0205159	0.0167172	0.0151431	0.00974694	0.0579997	0.00498326	0.00400721
A Peak Width	1.08042	0.95834	0.984318	0.723038	0.802695	0.714347	0.761096	0.668512	0.627568	0.640036	0.595755	0.744433	0.591676	0.601935
B Peak Width	0.571646	0.538522	0.637119	0.522817	0.512093	0.508883	0.541931	0.53036	0.534536	0.540028	0.494883	0.600148	0.515842	0.501389
A Peak Centre Shift	46.4044	46.2222	46.3841	46.4503	46.9664	47.0599	46.8891	46.4602	46.0233	46.021	45.7579	45.8392	45.8043	45.9239
B Peak Centre Shift	51.2842	51.148	51.3546	51.4818	51.9955	52.1334	51.9619	51.5945	51.1904	51.1989	50.9513	50.9739	51.0088	51.1232
25K	VBG	A and B	Lower Confidence Bands
Wavelength	690.88	692.16	694.26	696.23	698.3	699.93	702.57	704.21	706.37	708.4	710.3	712.39	714.31	716.47
Intensity A	1.88497	3.13785	3.71077	1.93246	9.152	11.1743	7.4459	15.6766	14.854	21.5365	28.2981	15.7234	20.0402	23.7914
Intensity B	106.028	113.797	134.667	36.6915	214.768	164.853	134.258	153.573	99.1011	94.1454	79.8007	36.4773	28.8164	23.5623
Background 1	-0.687987	-0.727593	-0.870086	-0.150655	-1.00635	-0.941492	-0.688774	-0.265361	-0.151092	0.0113749	0.426371	-2.26715	0.232027	0.233026
Background 2	-0.0127253	-0.0142027	-0.0209436	-0.00369375	-0.0248035	-0.0160459	-0.0133253	-0.0163924	-0.0118205	-0.0111393	-0.0104056	-0.0345201	-0.00593605	-0.00639611
A Peak Width	0.129384	0.216134	0.190411	0.328527	0.31267	0.372622	0.368877	0.449535	0.450634	0.518301	0.525082	0.318851	0.537691	0.558444
B Peak Width	0.538114	0.506821	0.597006	0.49648	0.485045	0.481884	0.514649	0.505758	0.505231	0.512362	0.47132	0.394727	0.480747	0.461369
A Peak Centre Shift	45.7615	45.7289	45.8524	46.1888	46.6342	46.8282	46.6209	46.3107	45.9018	45.9386	45.7098	45.5501	45.7679	45.8945
B Peak Centre Shift	51.2615	51.1259	51.3275	51.4638	51.9767	52.1146	51.9436	51.578	51.1709	51.1798	50.935	50.8316	50.9848	51.0964
25K	ORD	2A and 2B	PeakData
Wavelength	700.47	702.32	704.43	706.32	708.45	710.53	712.36	714.5	716.28	718.4	720.35	722.35	725.45	730.35	735.35	740.47	745.26
Intensity A	7.75852	9.02474	8.20852	7.37312	9.45401	9.1748	8.48655	6.42353	6.6834	9.8947	8.24275	7.44976	5.52463	6.08958	5.84657	3.99951	1.33457
Intensity B	82.2329	75.6909	55.2387	44.5845	37.4451	23.8827	16.2526	8.09694	6.06968	5.81182	3.94439	1.85421	1.03119	0.586532	0.843594	0.501929	0.344289
Background 1	1.03476	-0.102034	0.1213	-1.85921	0.160201	0.175553	-1.89126	-0.0729957	0.052598	0.0103595	-0.0951878	-0.104464	-0.0605349	0.172514	0.518336	0.592808	0.100407
Background 2	0.0101792	0.0246615	0.0185543	0.0396182	0.0166088	0.0113999	0.0347617	0.00805307	0.00621154	0.010082	0.0105314	0.00840965	0.00500905	0.00467078	0.000985492	-0.000887834	0.00230667
A Peak Width	1.77525	2.05228	1.88418	1.60858	1.4617	1.14922	0.941485	0.973466	0.926735	0.939557	0.994999	0.900835	0.89104	0.855905	0.88252	0.817239	1.08443
B Peak Width	0.66375	0.714994	0.719573	0.71403	0.742749	0.755729	0.660889	0.712102	0.665443	0.766866	0.765856	1.18023	8.23346	10	9.99999	9.99997	0.673001
A Peak Centre Shift	91.5141	91.2701	91.3166	91.3312	91.3954	91.601	91.349	91.6606	91.6723	91.3622	91.6593	91.5231	91.8453	92.0727	91.4439	91.1429	91.0961
B Peak Centre Shift	102.55	102.398	102.289	102.171	102.028	102.109	101.875	102.148	102.123	101.77	102.044	101.929	99.5	100.476	100.726	100.5	102.962
25K	ORD	2A and 2B	Upper Confidence Bands
Wavelength	700.47	702.32	704.43	706.32	708.45	710.53	712.36	714.5	716.28	718.4	720.35	722.35	725.45	730.35	735.35	740.47	745.26
Intensity A	9.80701	9.69781	8.82082	10.4555	9.97486	9.6271	11.8614	6.75052	7.11377	10.2678	8.57192	7.77449	6.74884	6.38895	6.1228	4.28639	1.54876
Intensity B	85.5656	76.8237	56.2227	49.1949	38.1732	24.4455	20.2729	8.47855	6.57682	6.22383	4.31902	2.13763	1.55192	0.758255	1.07982	0.902889	0.615542
Background 1	3.08569	0.669677	0.81748	1.00336	0.634979	0.546838	0.436386	0.162851	0.362567	0.290036	0.145115	0.126812	0.926537	0.438061	0.862776	1.18058	0.286521
Background 2	0.0292855	0.0317064	0.0248533	0.0672893	0.0211506	0.0149347	0.0583403	0.0104138	0.00928198	0.0128154	0.01303	0.0107999	0.0151062	0.00829064	0.0065755	0.00906938	0.00441768
A Peak Width	2.52642	2.30498	2.11557	2.66539	1.58771	1.23637	1.50279	1.04805	1.01652	0.993135	1.05471	0.959622	1.2583	0.932638	0.958613	0.923944	1.35023
B Peak Width	0.703211	0.730746	0.738461	0.822844	0.764072	0.783739	0.90192	0.761732	0.74734	0.84738	0.874442	1.45665	18.2703	15.8451	14.778	20.7844	1.49158
A Peak Centre Shift	91.9823	91.4229	91.4569	92.0031	91.4758	91.6576	91.7232	91.7101	91.732	91.3976	91.6991	91.5623	92.0385	92.1142	91.4849	91.2006	91.2702
B Peak Centre Shift	102.577	102.409	102.302	102.245	102.043	102.127	102.038	102.182	102.179	101.824	102.117	102.11	104.249	102.757	102.243	103.397	103.493
25K	ORD	2A and 2B	Lower Confidence Bands
Wavelength	700.47	702.32	704.43	706.32	708.45	710.53	712.36	714.5	716.28	718.4	720.35	722.35	725.45	730.35	735.35	740.47	745.26
Intensity A	5.71003	8.35168	7.59622	4.29073	8.93316	8.7225	5.1117	6.09653	6.25303	9.52165	7.91359	7.12502	4.30042	5.7902	5.57035	3.71264	1.12037
Intensity B	78.9002	74.5581	54.2547	39.9741	36.7169	23.3199	12.2323	7.71532	5.56254	5.39981	3.56975	1.5708	0.51046	0.414809	0.607364	0.100969	0.0730357
Background 1	-1.01618	-0.873746	-0.574879	-4.72178	-0.314577	-0.195732	-4.21891	-0.308842	-0.257371	-0.269317	-0.335491	-0.335739	-1.04761	-0.0930339	0.173896	0.00503843	-0.0857073
Background 2	-0.00892703	0.0176166	0.0122554	0.0119472	0.012067	0.00786522	0.0111832	0.00569238	0.0031411	0.00734859	0.00803273	0.00601937	-0.00508808	0.00105092	-0.00460452	-0.010845	0.000195654
A Peak Width	1.02407	1.79957	1.65279	0.551781	1.3357	1.06208	0.380178	0.898878	0.836949	0.885979	0.935292	0.842049	0.523781	0.779172	0.806427	0.710534	0.818626
B Peak Width	0.624289	0.699243	0.700686	0.605216	0.721427	0.727719	0.419858	0.662471	0.583545	0.686352	0.657269	0.903812	-1.80341	4.15486	5.22202	-0.784433	-0.145578
A Peak Centre Shift	91.0458	91.1173	91.1764	90.6592	91.3149	91.5444	90.9748	91.6111	91.6126	91.3268	91.6196	91.4838	91.652	92.0313	91.4029	91.0853	90.9221
B Peak Centre Shift	102.523	102.388	102.276	102.098	102.014	102.091	101.711	102.115	102.068	101.716	101.971	101.749	94.7512	98.1942	99.2079	97.6026	102.432
25K	VBG	2A and 2B	PeakData
Wavelength	690.88	692.16	694.26	696.23	698.3	699.93	702.57	704.21	706.37	708.4	710.3	712.39	714.31	716.47
Intensity A	2.04462	4.84807	4.06816	1.06908	5.93361	5.15668	3.51685	5.80778	5.23013	6.71847	7.74502	5.43801	5.44755	5.92378
Intensity B	40.258	41.2683	50.0819	13.3025	76.5132	56.8227	47.9306	50.3893	31.172	26.8485	21.2422	10.0698	7.25998	5.67112
Background 1	2.1338	-13.3707	-0.703992	-0.190003	-0.924597	-0.721542	-2.94915	-0.18739	-0.0669332	0.0681066	0.389637	-1.36807	-0.138137	1.72297
Background 2	-0.0060593	0.122477	0.0176899	0.00464775	0.0244442	0.0196156	0.0230837	0.0146974	0.0106397	0.0106794	0.00864091	0.0254435	0.00770238	-0.00776368
A Peak Width	1.24339	12.1022	2.24347	2.19498	2.1595	1.97437	24.6056	2.02193	1.60684	1.39952	1.1394	0.939509	1.03009	0.826318
B Peak Width	0.657283	0.651907	0.794523	0.668296	0.664452	0.660168	0.681281	0.72328	0.722708	0.756535	0.694439	0.655191	0.709875	0.588725
A Peak Centre Shift	91.7416	89	91.5877	91.4365	91.6872	91.9364	89	91.5403	91.2911	91.4323	91.3049	91.2799	91.3567	91.5269
B Peak Centre Shift	102.099	101.985	102.23	102.337	102.873	103	102.893	102.508	102.098	102.085	101.832	101.796	101.864	101.976
25K	VBG	2A and 2B	Upper Confidence Bands
Wavelength	690.88	692.16	694.26	696.23	698.3	699.93	702.57	704.21	706.37	708.4	710.3	712.39	714.31	716.47
Intensity A	6.01562	15.6812	4.49745	1.17799	6.49775	5.69933	14.1495	6.28736	5.64112	7.12731	8.19201	9.62779	5.71422	9.35911
Intensity B	45.7057	48.7452	50.7966	13.4979	77.5212	57.7539	50.4229	51.1848	31.7823	27.4028	21.8135	15.0819	7.58048	9.72756
Background 1	5.58895	18.1405	-0.196072	-0.056088	-0.205567	-0.0489523	20.1583	0.377821	0.315051	0.431076	0.754892	1.80892	0.0599638	4.05804
Background 2	0.0243791	0.347707	0.0222321	0.0058316	0.030732	0.0254756	0.163614	0.0198051	0.0143303	0.0141585	0.0121202	0.055494	0.00968297	0.015373
A Peak Width	5.05978	43.5427	2.63991	2.57269	2.50901	2.32522	74.6413	2.29894	1.8053	1.53218	1.24056	2.04247	1.1063	1.54297
B Peak Width	0.788063	0.846385	0.811288	0.682711	0.677326	0.676095	0.737941	0.740112	0.743572	0.779604	0.72192	1.1345	0.756187	1.2057
A Peak Centre Shift	94.1536	97.263	91.8239	91.6594	91.8917	92.1434	108.459	91.7068	91.4173	91.5175	91.3706	92.0037	91.4071	92.006
B Peak Centre Shift	102.187	102.103	102.241	102.347	102.882	NaN	102.929	102.52	102.112	102.101	101.851	102.121	101.896	102.398
25K	VBG	2A and 2B	Lower Confidence Bands
Wavelength	690.88	692.16	694.26	696.23	698.3	699.93	702.57	704.21	706.37	708.4	710.3	712.39	714.31	716.47
Intensity A	-1.92637	-5.98506	3.63888	0.960177	5.36948	4.61404	-7.11578	5.32819	4.81913	6.30963	7.29804	1.24823	5.18088	2.48846
Intensity B	34.8103	33.7914	49.3672	13.1071	75.5051	55.8914	45.4383	49.5939	30.5618	26.2942	20.6709	5.05762	6.93948	1.61469
Background 1	-1.32135	-44.8819	-1.21191	-0.323918	-1.64363	-1.39413	-26.0566	-0.752602	-0.448917	-0.294863	0.0243811	-4.54506	-0.336238	-0.612102
Background 2	-0.0364977	-0.102754	0.0131476	0.00346389	0.0181563	0.0137557	-0.117447	0.0095898	0.00694915	0.0072004	0.00516165	-0.00460705	0.0057218	-0.0309004
A Peak Width	-2.57299	-19.3383	1.84703	1.81728	1.81	1.62352	-25.43	1.74493	1.40837	1.26686	1.03823	-0.163447	0.953883	0.10967
B Peak Width	0.526502	0.457429	0.777758	0.653882	0.651578	0.644241	0.62462	0.706449	0.701844	0.733465	0.666959	0.175878	0.663563	-0.0282478
A Peak Centre Shift	89.3296	80.737	91.3515	91.2137	91.4826	91.7294	69.5407	91.3737	91.1649	91.3472	91.2391	90.556	91.3063	91.0477
B Peak Centre Shift	102.01	101.867	102.218	102.327	102.865	NaN	102.858	102.497	102.084	102.07	101.813	101.47	101.833	101.553
25K	ORD	2A+B and 3B	PeakData
Wavelength	700.47	702.32	704.43	706.32	708.45	710.53	712.36	714.5	716.28	718.4	720.35	722.35	725.45	730.35	735.35	740.47	745.26
Intensity A	28.7541	26.4675	18.8928	14.6626	12.6022	8.84286	6.95681	4.28029	3.68683	4.64217	3.63577	2.68229	2.11676	1.32254	0.804984	0.637942	0.0356831
Intensity B	29.6081	24.6985	17.6736	14.4189	12.0919	7.21311	5.14663	2.71817	1.67455	1.06622	3.30442	3.30792	1.04402e-07	8.07508	7.69165e-08	4.34335e-05	0.0140064
Background 1	-4.61318	-4.60258	-3.40921	-1.87734	-4.78739	-5.63194	-5.37133	-3.21466	-8.26636	-3.84925	-4.49536	-4.97849	-5.23506	-10.5382	-11.1907	-3.07897	-4.05598
Background 2	0.0490614	0.0544662	0.0421788	0.0280561	0.0466019	0.0464678	0.0449561	0.0270742	0.0637629	0.0371662	0.042822	0.0456381	0.0466088	0.0906357	0.0991187	0.0365956	0.035854
A Peak Width	1.88603	2.01436	2.16506	2.39909	3.33729	4.28859	4.50427	5.1929	4.97138	5.2083	4.71608	4.48506	4.56035	2.955	1.56971	1.14576	0.0096533
B Peak Width	0.914948	1.04501	1.0415	1.04229	0.949931	0.968592	0.697016	0.549472	0.244389	0.406669	2.13208	0.00448437	1.71993e-06	0.0170608	1.72535e-09	1.83383e-05	0.00961234
A Peak Centre Shift	141.44	141.226	141.126	141.178	141.177	141.479	141.456	142.234	141.929	142.634	142.68	142.888	143	142.956	143	143	140.819
B Peak Centre Shift	153.444	153.282	153.141	153.103	152.89	153.025	152.781	153.065	153.103	152.862	155	152.367	152.016	153.395	152	152.479	154.187
25K	ORD	2A+B and 3B	Upper Confidence Bands
Wavelength	700.47	702.32	704.43	706.32	708.45	710.53	712.36	714.5	716.28	718.4	720.35	722.35	725.45	730.35	735.35	740.47	745.26
Intensity A	29.7581	27.5875	19.7901	15.2427	13.1594	9.26042	7.77208	4.50596	5.73993	5.07058	5.02216	3.29286	NaN	2.07162	NaN	NaN	77183.2
Intensity B	31.0225	26.209	18.9108	15.2783	13.0595	7.94599	7.05774	3.33169	13.1138	2.36933	5.27199	2.93268e+06	NaN	120.343	NaN	NaN	95691
Background 1	-2.40587	-1.8516	-0.94842	-0.490693	-2.96802	-3.93397	-2.60575	-2.35318	-0.280865	-2.10796	-0.24987	-3.14884	NaN	-8.91225	NaN	NaN	-3.53983
Background 2	0.0619794	0.0704491	0.0563955	0.0363306	0.0572568	0.0562553	0.0614419	0.0321355	0.110667	0.047331	0.0694997	0.0569688	NaN	0.101416	NaN	NaN	0.0395676
A Peak Width	2.00456	2.17162	2.35884	2.57149	3.62752	4.70233	5.58169	5.77604	10.7572	6.2389	8.43103	6.48938	NaN	5.84118	NaN	NaN	10515.6
B Peak Width	0.981626	1.14419	1.15573	1.13643	1.06526	1.11985	1.08528	0.735732	2.62449	1.141	4.32136	1991.12	NaN	0.41354	NaN	NaN	33058.3
A Peak Centre Shift	141.505	141.31	141.225	141.272	141.317	141.659	141.969	142.494	144.522	143.082	144.53	143.908	NaN	144.636	NaN	NaN	1030.99
B Peak Centre Shift	153.487	153.346	153.214	153.165	152.966	153.124	153.04	153.189	154.165	153.377	156.297	361.95	NaN	159.207	NaN	NaN	2024.64
25K	ORD	2A+B and 3B	Lower Confidence Bands
Wavelength	700.47	702.32	704.43	706.32	708.45	710.53	712.36	714.5	716.28	718.4	720.35	722.35	725.45	730.35	735.35	740.47	745.26
Intensity A	27.75	25.3475	17.9954	14.0826	12.045	8.4253	6.14153	4.05463	1.63373	4.21377	2.24938	2.07172	NaN	0.573464	NaN	NaN	-77183.1
Intensity B	28.1937	23.1881	16.4364	13.5595	11.1242	6.48023	3.23552	2.10466	-9.76467	-0.236892	1.33685	-2.93267e+06	NaN	-104.193	NaN	NaN	-95691
Background 1	-6.82049	-7.35357	-5.87001	-3.26398	-6.60676	-7.32992	-8.13692	-4.07613	-16.2519	-5.59054	-8.74085	-6.80815	NaN	-12.1641	NaN	NaN	-4.57212
Background 2	0.0361433	0.0384833	0.0279621	0.0197817	0.035947	0.0366804	0.0284702	0.0220129	0.0168588	0.0270015	0.0161444	0.0343073	NaN	0.079855	NaN	NaN	0.0321404
A Peak Width	1.7675	1.85709	1.97128	2.22669	3.04706	3.87484	3.42686	4.60977	-0.81446	4.17771	1.00114	2.48074	NaN	0.0688232	NaN	NaN	-10515.5
B Peak Width	0.848271	0.945838	0.927274	0.948147	0.834599	0.817337	0.308747	0.363211	-2.13571	-0.327658	-0.0571991	-1991.11	NaN	-0.379418	NaN	NaN	-33058.3
A Peak Centre Shift	141.375	141.143	141.027	141.084	141.036	141.299	140.944	141.973	139.335	142.185	140.829	141.869	NaN	141.276	NaN	NaN	-749.357
B Peak Centre Shift	153.4	153.218	153.069	153.041	152.814	152.926	152.522	152.941	152.041	152.347	153.702	-57.2162	NaN	147.584	NaN	NaN	-1716.27
25K	VBG	2A+B and 3B	PeakData
Wavelength	690.88	692.16	694.26	696.23	698.3	699.93	702.57	704.21	706.37	708.4	710.3	712.39	714.31	716.47
Intensity A	13.6013	12.061	20.7496	4.85157	27.9949	19.9284	17.6881	16.9714	10.435	8.84724	6.91773	3.60968	3.11892	2.68084
Intensity B	15.0461	16.1214	20.8957	5.1879	29.5706	21.0653	18.1561	17.5178	9.62242	9.03309	6.23235	2.78846	1.86907	1.5535
Background 1	-2.64076	-0.0667384	-2.11479	-0.529308	-2.11687	-1.28952	-1.18542	-10.4264	-0.880146	-1.34432	-1.60917	5.63303	-0.656688	0.586061
Background 2	0.0241888	0.00941667	0.0241996	0.00609006	0.028346	0.0199238	0.0180495	0.0929689	0.0155567	0.0194345	0.0210973	-0.0270879	0.00993786	0.00380525
A Peak Width	2.67544	3.45336	2.20486	2.16145	1.89044	1.91863	1.6698	1.64843	2.05851	2.85575	3.76344	2.41686	4.75688	5.11901
B Peak Width	0.880192	0.740166	0.932074	0.858227	0.877897	0.932191	0.97555	0.705311	1.05982	0.917787	0.770571	0.716143	0.688065	0.461274
A Peak Centre Shift	142.304	141.702	141.814	141.666	141.935	142.047	141.585	141.298	141.011	141.194	141.193	141.524	141.859	142.513
B Peak Centre Shift	152.953	152.837	153.106	153.243	153.794	153.972	153.814	153.406	152.964	152.955	152.747	152.796	152.658	152.894
25K	VBG	2A+B and 3B	Upper Confidence Bands
Wavelength	690.88	692.16	694.26	696.23	698.3	699.93	702.57	704.21	706.37	708.4	710.3	712.39	714.31	716.47
Intensity A	13.9145	15.3329	21.1683	4.96501	28.5638	20.4469	18.1823	23.962	10.8267	9.23401	7.22744	6.19174	3.29334	4.12662
Intensity B	15.585	23.0001	21.5355	5.36679	30.4011	21.8051	18.8003	28.1706	10.1653	9.7078	6.90362	7.49684	2.31124	6.20469
Background 1	-2.05479	7.57878	-1.46783	-0.351032	-1.2704	-0.495807	-0.520163	-0.921446	-0.297534	-0.654845	-0.958942	9.98773	-0.255043	4.06675
Background 2	0.027812	0.0557547	0.0283996	0.00724024	0.0338035	0.0250176	0.022537	0.156526	0.019663	0.0242243	0.0255308	0.00279796	0.0128668	0.0290398
A Peak Width	2.78137	5.18091	2.27707	2.24366	1.95205	1.9991	1.74266	2.7113	2.18116	3.06382	4.06261	5.23587	5.26411	10.5418
B Peak Width	0.927175	1.20903	0.974673	0.902195	0.914574	0.981046	1.02779	1.34042	1.1519	1.02224	0.896076	2.52261	0.938707	2.54554
A Peak Centre Shift	142.365	142.634	141.858	141.717	141.973	142.097	141.631	141.977	141.088	141.319	141.362	143.252	142.127	145.304
B Peak Centre Shift	152.984	153.153	153.134	153.272	153.818	154.005	153.848	153.835	153.023	153.024	152.83	154.005	152.821	154.263
25K	VBG	2A+B and 3B	Lower Confidence Bands
Wavelength	690.88	692.16	694.26	696.23	698.3	699.93	702.57	704.21	706.37	708.4	710.3	712.39	714.31	716.47
Intensity A	13.2881	8.78909	20.3309	4.73812	27.4259	19.4098	17.194	9.98067	10.0434	8.46048	6.60801	1.02762	2.94451	1.23506
Intensity B	14.5072	9.24272	20.256	5.00902	28.7402	20.3255	17.5119	6.86487	9.07956	8.35839	5.56109	-1.91992	1.42691	-3.09769
Background 1	-3.22672	-7.71226	-2.76175	-0.707584	-2.96333	-2.08324	-1.85067	-19.9313	-1.46276	-2.0338	-2.2594	1.27833	-1.05833	-2.89463
Background 2	0.0205656	-0.0369213	0.0199995	0.00493989	0.0228885	0.0148299	0.013562	0.0294122	0.0114504	0.0146447	0.0166638	-0.0569738	0.00700891	-0.0214292
A Peak Width	2.56951	1.7258	2.13265	2.07923	1.82884	1.83816	1.59695	0.585552	1.93587	2.64769	3.46427	-0.402155	4.24965	-0.30374
B Peak Width	0.833208	0.271298	0.889474	0.81426	0.84122	0.883335	0.923315	0.0702019	0.967743	0.813329	0.645066	-1.09033	0.437423	-1.62299
A Peak Centre Shift	142.242	140.771	141.769	141.616	141.896	141.997	141.538	140.62	140.934	141.07	141.024	139.797	141.591	139.723
B Peak Centre Shift	152.921	152.52	153.077	153.213	153.769	153.939	153.779	152.978	152.904	152.887	152.664	151.587	152.495	151.525

## Sheet: 50K
Temperature	Filter	Mode	Data Type
50K	ORD	A and B	PeakData
Wavelength	700.08	702.45	704.42	706.46	708.46	710.52	712.37	714.52	716.47	718.43	720.35	722.42	724.31	726.41	730.35	735.33	740.23	745.33
Intensity A	15.0711	21.8372	17.7056	18.8474	28.4155	27.0481	28.252	22.6209	24.3207	24.0475	22.875	20.257	18.3538	20.0471	17.3033	16.2854	9.5332
Intensity B	213.74	223.538	158.987	166.698	185.637	117.015	100.454	57.641	46.8828	33.3157	25.9986	17.2468	8.93983	7.34515	4.72819	2.28134	2.103
Background 1	2.18604	1.85955	1.80144	3.19588	3.08193	2.32914	3.03399	1.4791	1.40738	1.34691	1.25595	1.0423	1.14774	1.65096	0.812011	0.88925	0.692714
Background 2	-0.00373257	0.00382417	-0.00202557	-0.0139577	-0.00133841	-0.00572363	-0.0090704	-0.00272366	-0.00453036	-0.00696677	-0.00368115	-0.00206078	-0.00852092	-0.0166699	-0.00357444	-0.00440888	-0.00481106
A Peak Width	0.658337	0.634384	0.653032	0.693026	0.661145	0.621979	0.77271	0.611465	0.618961	0.631625	0.678165	0.65626	0.691903	0.6066	0.645569	0.612292	0.589989
B Peak Width	0.550792	0.535554	0.531066	0.545713	0.532168	0.537378	0.617569	0.519099	0.502044	0.512139	0.531944	0.51585	0.541482	0.438482	0.507795	0.506579	0.0359964
A Peak Centre Shift	46.6472	46.6305	46.2198	46.0338	45.6066	45.706	45.8401	45.6739	45.806	45.4182	46.094	46.0048	45.9534	47.8117	46.2862	45.8344	45.7134
B Peak Centre Shift	51.8295	51.8423	51.4126	51.2492	50.8179	50.9	51.0115	50.8905	51.0174	50.618	51.2771	51.1742	51.1522	52.9641	51.4621	51.0275	63.5771
50K	ORD	A and B	Upper Confidence Bands
Wavelength	700.08	702.45	704.42	706.46	708.46	710.52	712.37	714.52	716.47	718.43	720.35	722.42	724.31	726.41	730.35	735.33	740.23	745.33
Intensity A	18.5487	25.516	20.1547	21.3645	31.0325	28.8163	29.73	23.5456	25.1544	24.7832	23.4001	20.7236	18.7421	22.5331	17.6331	16.6321	9.91884
Intensity B	217.552	227.547	161.695	169.517	188.568	118.911	102.106	58.6387	47.8008	34.1285	26.5926	17.775	9.37782	10.2376	5.09883	2.6631	584.182
Background 1	4.0988	3.65375	3.0878	4.65965	4.40713	3.24476	3.94713	1.92926	1.8358	1.75311	1.52387	1.28843	1.36879	2.8549	0.99133	1.06861	0.924565
Background 2	0.0287833	0.0369199	0.0208767	0.0112724	0.0236154	0.0109952	0.00703921	0.00603407	0.00355149	0.000445181	0.00174687	0.00275267	-0.00433379	0.00903929	-3.11234e-05	-0.000651778	-0.000250604
A Peak Width	0.889387	0.794091	0.791162	0.834595	0.752548	0.683155	0.834982	0.648762	0.650761	0.66084	0.70147	0.678928	0.714036	0.718552	0.664021	0.631739	0.625891
B Peak Width	0.56536	0.54972	0.544441	0.559335	0.544592	0.550221	0.632713	0.532315	0.516476	0.530542	0.550018	0.53927	0.580793	0.693613	0.566705	0.633029	5.41096
A Peak Centre Shift	46.7987	46.7376	46.31	46.1262	45.6675	45.7466	45.8806	45.6989	45.8272	45.4375	46.1096	46.02	45.968	47.887	46.2985	45.8475	45.7373
B Peak Centre Shift	51.8393	51.8519	51.4216	51.2586	50.8263	50.9088	51.0216	50.8996	51.0274	50.6306	51.2892	51.1899	51.1787	53.1405	51.502	51.1117	63.8219
50K	ORD	A and B	Lower Confidence Bands
Wavelength	700.08	702.45	704.42	706.46	708.46	710.52	712.37	714.52	716.47	718.43	720.35	722.42	724.31	726.41	730.35	735.33	740.23	745.33
Intensity A	11.5936	18.1584	15.2565	16.3303	25.7986	25.2799	26.7739	21.6962	23.4869	23.3119	22.35	19.7905	17.9655	17.5611	16.9735	15.9387	9.14757
Intensity B	209.929	219.528	156.279	163.88	182.706	115.119	98.8017	56.6433	45.9647	32.503	25.4047	16.7186	8.50185	4.45269	4.35756	1.89958	-579.976
Background 1	0.273283	0.0653643	0.51507	1.73212	1.75673	1.41352	2.12085	1.02893	0.978957	0.940717	0.988017	0.796177	0.92669	0.447019	0.632693	0.709887	0.460863
Background 2	-0.0362485	-0.0292715	-0.0249278	-0.0391879	-0.0262923	-0.0224425	-0.02518	-0.0114814	-0.0126122	-0.0143787	-0.00910917	-0.00687424	-0.012708	-0.0423791	-0.00711775	-0.00816598	-0.00937151
A Peak Width	0.427288	0.474677	0.514903	0.551456	0.569742	0.560803	0.710438	0.574167	0.587161	0.60241	0.654859	0.633592	0.66977	0.494648	0.627116	0.592844	0.554087
B Peak Width	0.536223	0.521388	0.51769	0.532092	0.519744	0.524534	0.602424	0.505883	0.487612	0.493737	0.513871	0.492429	0.502172	0.18335	0.448885	0.380129	-5.33897
A Peak Centre Shift	46.4957	46.5234	46.1297	45.9414	45.5457	45.6654	45.7997	45.6489	45.7849	45.3989	46.0785	45.9897	45.9388	47.7365	46.274	45.8214	45.6896
B Peak Centre Shift	51.8198	51.8327	51.4036	51.2399	50.8096	50.8913	51.0013	50.8815	51.0075	50.6054	51.265	51.1586	51.1256	52.7878	51.4221	50.9433	63.3322
50K	VBG	A and B	PeakData
Wavelength	690.61	692.13	694.2	696.33	698.25	700.19	702.23	704.32	706.33	708.26	710.18	712.39	714.47	716.33
Intensity A	4.89745	5.5647	6.08884	10.31	10.0607	13.6844	18.0011	24.6838	13.9425	20.9287	18.753	18.3076	12.3822	19.9898
Intensity B	88.845	108.054	89.5388	133.6	120.87	145.122	156.168	179.217	81.1203	91.375	60.5621	45.8501	26.4526	29.9428
Background 1	0.592961	0.547822	0.737103	0.985	1.21543	1.31529	2.10684	3.25709	1.18078	1.8145	1.49753	0.937073	0.852986	0.299589
Background 2	-0.000272179	0.00150248	-0.00208249	0.001682	-0.00351166	-0.0027333	-0.00597723	-0.0186638	-0.00347667	-0.00786362	-0.00814324	-0.000168877	-0.00576623	0.0119397
A Peak Width	-0.586023	-0.669347	0.658638	0.6006	0.607062	0.753123	0.628071	0.618377	-0.651441	0.607656	-0.595139	-0.675245	-0.595518	0.586979
B Peak Width	0.564107	0.52836	0.541565	0.5383	0.569286	0.764822	0.535627	0.544782	0.621427	0.529249	0.519885	0.578086	0.517787	0.494125
A Peak Centre Shift	45.7678	45.7853	46.2822	46.6	46.1969	46.2937	46.4424	45.5063	45.9065	45.5175	45.8349	45.2573	45.7201	45.7247
B Peak Centre Shift	50.9081	50.9487	51.3719	51.72	51.3877	51.53	51.6247	50.6853	51.1182	50.7041	51.0232	50.4569	50.9208	50.9335
50K	VBG	A and B	Upper Confidence Bands
Wavelength	690.61	692.13	694.2	696.33	698.25	700.19	702.23	704.32	706.33	708.26	710.18	712.39	714.47	716.33
Intensity A	6.73525	7.56601	7.60311	12.54	12.4186	17.7813	20.5106	27.7579	15.3962	22.5092	19.5893	19.1371	12.9013	22.482
Intensity B	90.7084	110.317	91.2212	136	123.305	149.184	158.869	182.476	82.6088	93.0756	61.459	46.7439	27.0093	32.6368
Background 1	1.72484	1.97726	1.6462	1.89	2.78444	3.96815	3.67097	5.36135	2.05673	2.79699	2.04119	1.40346	1.17008	1.89812
Background 2	0.0185886	0.0247311	0.0139811	0.01855	0.0225703	0.0451106	0.0215219	0.0169984	0.0127771	0.0098016	0.0013721	0.0095152	0.00010781	0.0407255
A Peak Width	-0.246562	-0.290733	0.908123	0.7933	0.827784	1.10023	0.761611	0.738004	-0.548411	0.677467	-0.554389	-0.62922	-0.557753	0.698607
B Peak Width	0.581774	0.544972	0.556703	0.5523	0.58645	0.797246	0.549304	0.559543	0.638477	0.543876	0.531347	0.594958	0.533913	0.55963
A Peak Centre Shift	45.9856	46.0261	46.4462	46.73	46.3387	46.5192	46.53	45.5832	45.9744	45.5635	45.8614	45.288	45.7451	45.7978
B Peak Centre Shift	50.9199	50.9596	51.3819	51.73	51.3991	51.5514	51.634	50.6953	51.1295	50.7139	51.0309	50.4683	50.9317	50.9785
50K	VBG	A and B	Lower Confidence Bands
Wavelength	690.61	692.13	694.2	696.33	698.25	700.19	702.23	704.32	706.33	708.26	710.18	712.39	714.47	716.33
Intensity A	3.05965	3.56339	4.57457	8.075	7.7027	9.58747	15.4916	21.6098	12.4889	19.3483	17.9168	17.4781	11.863	17.4976
Intensity B	86.9815	105.792	87.8563	131.3	118.436	141.061	153.467	175.959	79.6317	89.6745	59.6651	44.9563	25.8959	27.2488
Background 1	-0.538913	-0.881615	-0.171996	0.07996	-0.353572	-1.33757	0.54271	1.15284	0.304817	0.832013	0.953876	0.47069	0.535895	-1.29895
Background 2	-0.019133	-0.0217261	-0.018146	-0.01519	-0.0295936	-0.0505772	-0.0334764	-0.0543259	-0.0197304	-0.0255288	-0.0176586	-0.00985296	-0.0116403	-0.0168461
A Peak Width	-0.925485	-1.04796	0.409153	0.4078	0.38634	0.406017	0.49453	0.498751	-0.754471	0.537845	-0.635889	-0.72127	-0.633283	0.475351
B Peak Width	0.54644	0.511749	0.526427	0.5244	0.552121	0.732398	0.52195	0.53002	0.604377	0.514622	0.508423	0.561214	0.50166	0.42862
A Peak Centre Shift	45.5499	45.5445	46.1183	46.47	46.0551	46.0682	46.3547	45.4293	45.8386	45.4715	45.8085	45.2267	45.695	45.6517
B Peak Centre Shift	50.8963	50.9378	51.3618	51.71	51.3762	51.5086	51.6153	50.6754	51.1068	50.6944	51.0156	50.4456	50.9099	50.8884
50K	ORD	2A and 2B	Peakdata
Wavelength	700.08	702.45	704.42	706.46	708.46	710.52	712.37	714.52	716.47	718.43	720.35	722.42	724.31	726.41	730.35	735.33	740.23	745.33
Intensity A	8.25205	9.00357	6.88398	7.53527	9.09411	7.68592	9.5217	5.85814	5.8329	5.69885	5.41549	4.42078	3.98217	3.86757	3.09896	2.86404	1.57148	0.0192186
Intensity B	70.9483	67.2036	47.6133	46.2643	48.5546	30.9173	27.2967	13.6329	10.5136	6.44394	5.45565	3.21724	1.47405	0.788869	0.0884965	0.413593	0.277795	0.000375951
Background 1	-1.45088	0.0629801	0.162387	0.459119	0.853968	0.806947	1.39619	0.452645	0.431618	0.362691	0.457447	0.293777	0.132677	0.288788	1.5277	0.228578	0.30408	-2.51231
Background 2	0.0402259	0.0263671	0.0189619	0.0226273	0.0237244	0.0142522	0.0132971	0.00933698	0.00844814	0.00764235	0.00700807	0.00674377	0.00581879	0.00326507	-0.00467525	0.00319765	-0.000150455	0.0351374
A Peak Width	2.47453	2.33914	2.32682	2.43657	2.34054	1.85912	1.71146	1.4996	1.33443	1.27404	1.28386	1.1996	1.11232	1.02916	0.963996	0.972167	0.961029	0.0232059
B Peak Width	0.745617	0.75613	0.746472	0.80835	0.812561	0.80002	0.890808	0.780668	0.782182	0.885768	0.855814	0.79494	1.5563	3.31955	0.194018	9.07293	10	1.29229e-06
A Peak Centre Shift	91.5673	91.6876	91.0926	90.988	90.72	90.9605	91.1879	91.0906	91.1896	90.88	91.5807	91.5988	91.5261	93.3569	91.8656	91.3982	91.2645	91.8241
B Peak Centre Shift	102.637	102.666	102.232	102.05	101.602	101.673	101.793	101.699	101.747	101.376	102.047	101.896	101.896	103.021	100	100	102.23	102.884
50K	ORD	2A and 2B	Upper Confidence Bands
Wavelength	700.08	702.45	704.42	706.46	708.46	710.52	712.37	714.52	716.47	718.43	720.35	722.42	724.31	726.41	730.35	735.33	740.23	745.33
Intensity A	8.93682	9.57991	7.3553	8.06363	9.58527	8.148	9.99943	6.20934	6.17143	5.98089	5.68962	4.7176	4.24382	4.12928	5.28844	3.10643	1.81307	NaN
Intensity B	72.1741	68.208	48.4359	47.1683	49.3803	31.6174	27.9554	14.1181	10.9545	6.78134	5.79067	3.58102	1.69526	0.939523	8.93773	0.586611	0.490654	NaN
Background 1	-0.431	0.777831	0.784358	1.22399	1.45698	1.3171	1.91461	0.774535	0.731225	0.614871	0.686068	0.538944	0.346329	0.509168	3.17204	0.466435	0.638086	NaN
Background 2	0.0489685	0.0328531	0.0245177	0.0293479	0.0293537	0.0190113	0.018098	0.0125195	0.0113843	0.0100831	0.00937932	0.00925185	0.0080005	0.00586894	0.012491	0.00705939	0.00508256	NaN
A Peak Width	2.83827	2.591	2.59906	2.73543	2.55204	2.04089	1.85039	1.63979	1.45438	1.3719	1.38321	1.32242	1.22357	1.13658	1.98617	1.11317	1.22459	NaN
B Peak Width	0.76469	0.772826	0.765527	0.831801	0.833073	0.826854	0.922815	0.821887	0.830827	0.954909	0.934759	0.929143	1.92249	4.53733	25.4474	16.6258	23.421	NaN
A Peak Centre Shift	91.7711	91.837	91.2513	91.1579	90.8462	91.0721	91.2737	91.1805	91.267	90.943	91.6456	91.6793	91.5992	93.4269	92.5467	91.4787	91.4107	NaN
B Peak Centre Shift	102.65	102.677	102.245	102.066	101.616	101.691	101.815	101.727	101.78	101.423	102.1	101.986	102.129	103.655	NaN	NaN	106.341	NaN
50K	ORD	2A and 2B	Lower Confidence Bands
Wavelength	700.08	702.45	704.42	706.46	708.46	710.52	712.37	714.52	716.47	718.43	720.35	722.42	724.31	726.41	730.35	735.33	740.23	745.33
Intensity A	7.56728	8.42723	6.41266	7.00691	8.60296	7.22385	9.04398	5.50694	5.49437	5.4168	5.14136	4.12397	3.72052	3.60586	0.90949	2.62165	1.32989	NaN
Intensity B	69.7225	66.1993	46.7907	45.3604	47.729	30.2172	26.6379	13.1476	10.0727	6.10654	5.12063	2.85347	1.25284	0.638215	-8.76073	0.240575	0.0649365	NaN
Background 1	-2.47076	-0.651871	-0.459585	-0.305757	0.25096	0.296792	0.87778	0.130756	0.132011	0.110511	0.228827	0.0486115	-0.0809736	0.0684091	-0.116654	-0.00927846	-0.0299253	NaN
Background 2	0.0314832	0.0198812	0.013406	0.0159067	0.018095	0.00949315	0.00849615	0.00615444	0.00551202	0.00520162	0.00463682	0.00423569	0.00363708	0.000661197	-0.0218415	-0.000664095	-0.00538347	NaN
A Peak Width	2.11079	2.08728	2.05459	2.13771	2.12903	1.67735	1.57253	1.35942	1.21448	1.17617	1.18451	1.07677	1.00107	0.921731	-0.0581819	0.831165	0.69747	NaN
B Peak Width	0.726545	0.739434	0.727417	0.784898	0.792049	0.773186	0.858801	0.739448	0.733536	0.816627	0.776869	0.660738	1.1901	2.10178	-25.0594	1.52006	-3.42101	NaN
A Peak Centre Shift	91.3636	91.5382	90.9339	90.8181	90.5938	90.8489	91.1022	91.0008	91.1122	90.8169	91.5157	91.5182	91.453	93.287	91.1845	91.3178	91.1182	NaN
B Peak Centre Shift	102.624	102.655	102.219	102.035	101.588	101.655	101.772	101.671	101.714	101.33	101.995	101.806	101.662	102.387	NaN	NaN	98.1196	NaN
50K	VBG	2A and 2B	PeakData
Wavelength	690.61	692.13	694.2	696.33	698.25	700.19	702.23	704.32	706.33	708.26	710.18	712.39	714.47	716.33
Intensity A	2.87121	3.27596	2.85025	4.52349	4.81916	8.03528	8.11193	9.43949	5.05958	6.36422	5.942	5.30468	3.2349	5.0232
Intensity B	31.0113	35.024	30.4648	43.5604	41.4633	50.8476	47.7028	54.4296	24.4795	25.5835	16.33	12.2152	6.07006	6.60842
Background 1	-1.68137	-2.02735	-0.444645	-0.57992	-0.832798	-0.102091	-1.06405	0.375866	-0.0323161	0.477451	0.5126	0.357576	0.0510903	0.158809
Background 2	0.0257425	0.0295728	0.0136811	0.0206434	0.0226225	0.021542	0.0290085	0.0218784	0.0127182	0.0108046	0.00647	0.00733553	0.00557831	0.00659326
A Peak Width	2.90576	3.1717	2.82507	2.73881	-2.46524	-2.19209	-3.04307	2.11304	2.0415	-1.72462	1.318	-1.41893	-1.44731	-1.23792
B Peak Width	0.721341	0.705536	0.721082	0.726061	0.750466	0.959154	0.764001	0.77198	0.868919	0.75603	0.7608	0.812752	0.801635	0.794177
A Peak Centre Shift	91.6457	91.3225	91.7351	91.9589	91.2931	91.4044	90.6426	90.6451	91.161	90.8154	91.26	90.6774	91.1198	91.2354
B Peak Centre Shift	101.668	101.753	102.147	102.507	102.196	102.346	102.421	101.483	101.939	101.524	101.8	101.295	101.764	101.708
50K	VBG	2A and 2B	Upper Confidence Bands
Wavelength	690.61	692.13	694.2	696.33	698.25	700.19	702.23	704.32	706.33	708.26	710.18	712.39	714.47	716.33
Intensity A	3.26746	3.71029	3.11722	4.84927	5.21248	8.54934	9.34709	9.99842	5.35455	6.74233	6.304	5.62278	3.46022	5.29455
Intensity B	31.7875	35.9104	30.9855	44.183	42.1655	51.6188	50.1199	55.3457	24.9289	26.152	16.8	12.6342	6.37189	6.94639
Background 1	-1.05766	-1.24521	-0.0765268	-0.117366	-0.274555	0.481966	0.825883	1.07277	0.28321	0.859413	0.8462	0.618532	0.253331	0.388503
Background 2	0.0310105	0.0360717	0.0169303	0.0246823	0.0274569	0.0269347	0.0457745	0.0281294	0.0157378	0.0144304	0.009597	0.0100816	0.00758137	0.00885123
A Peak Width	3.63711	3.96667	3.28844	3.08539	-2.11272	-1.96064	-2.21388	2.32399	2.23422	-1.5609	1.445	-1.28833	-1.29067	-1.13508
B Peak Width	0.748162	0.732067	0.739299	0.741407	0.76927	0.980877	0.821316	0.791201	0.892664	0.780838	0.7932	0.854486	0.860858	0.854441
A Peak Centre Shift	92.0434	91.7355	91.999	92.1553	91.493	91.5444	91.1034	90.7698	91.2799	90.9177	91.34	90.7624	91.2205	91.3022
B Peak Centre Shift	101.686	101.771	102.159	102.517	102.209	102.361	102.46	101.496	101.955	101.541	101.8	101.323	101.804	101.749
50K	VBG	2A and 2B	Lower Confidence Bands
Wavelength	690.61	692.13	694.2	696.33	698.25	700.19	702.23	704.32	706.33	708.26	710.18	712.39	714.47	716.33
Intensity A	2.47496	2.84163	2.58328	4.19771	4.42585	7.52121	6.87677	8.88056	4.76462	5.98611	5.58	4.98658	3.00958	4.75185
Intensity B	30.2351	34.1377	29.9441	42.9377	40.7612	50.0763	45.2857	53.5136	24.0301	25.0151	15.86	11.7961	5.76822	6.27046
Background 1	-2.30509	-2.8095	-0.812764	-1.04247	-1.39104	-0.686149	-2.95398	-0.321042	-0.347842	0.0954883	0.1789	0.0966191	-0.15115	-0.0708847
Background 2	0.0204745	0.0230739	0.0104319	0.0166044	0.0177881	0.0161494	0.0122425	0.0156275	0.00969857	0.00717885	0.0033	0.00458949	0.00357525	0.00433529
A Peak Width	2.17442	2.37674	2.3617	2.39223	-2.81776	-2.42355	-3.87226	1.90209	1.84878	-1.88835	1.191	-1.54953	-1.60394	-1.34077
B Peak Width	0.69452	0.679006	0.702866	0.710715	0.731662	0.937432	0.706687	0.752759	0.845174	0.731223	0.7284	0.771019	0.742412	0.733912
A Peak Centre Shift	91.2481	90.9095	91.4712	91.7625	91.0931	91.2643	90.1817	90.5204	91.0421	90.713	91.18	90.5924	91.0191	91.1686
B Peak Centre Shift	101.65	101.736	102.135	102.496	102.183	102.332	102.382	101.47	101.923	101.507	101.8	101.268	101.724	101.667
50K	ORD	2A+B and 3B	PeakData
Wavelength	700.08	702.45	704.42	706.46	708.46	710.52	712.37	714.52	716.47	718.43	720.35	722.42	724.31	726.41	730.35	735.33	740.23	745.33
Intensity A	22.9231	21.9186	15.9569	15.6606	15.5573	9.81845	10.6056	5.46862	3.53281	2.19899	3.1769	2.13349	1.89673	1.72302	0.988767	0.564382	0.0125811	0.016372
Intensity B	25.1236	21.6085	14.7403	15.0318	14.2653	7.67046	7.66233	3.60489	6.28434	1.55217	0.957913	1.47482	1.91852	0.686823	5.63659e-05	2.46305e-09	0.0234441	0.0023
Background 1	6.45375	1.67014	4.30894	7.94	-4.06597	-19.5843	-9.4089	-3.97546	-14.9586	4.63373	-2.39419	-3.48423	-2.30841	0.113376	-7.61934	-9.00998	-9.72737	2.34225
Background 2	-0.0107744	0.0168205	-0.00637848	-0.0228983	0.0547644	0.156027	0.082348	0.0375501	0.122472	-0.0145506	0.0253429	0.0344659	0.023463	0.00361352	0.0658783	0.0775853	0.0802155	-0.0105829
A Peak Width	2.13446	2.30758	2.05417	1.99853	3.24199	3.82673	4.64364	4.54298	3.3032	3.57074	6.68674	5.7145	6.26034	6.32729	1.46151	0.568312	0.0100555	0.0156179
B Peak Width	0.886543	1.05904	1.02879	0.990536	1.04432	0.635757	1.00966	0.806112	0.0249624	0.173993	0.492059	0.0738001	0.0443986	10	1.19429e-05	9.31533e-09	0.00376825	0.0198444
A Peak Centre Shift	141.827	141.725	141.161	141.007	140.72	140.5	141.092	141.09	140.729	141.621	142.504	142.372	143.127	144.3	144.462	144.317	142.542	142.348
B Peak Centre Shift	153.424	153.456	153.01	152.805	152.382	152.427	152.581	152.557	152.782	152.267	152.824	152.497	152.827	151.753	150.133	149.044	153.976	151.496
50K	ORD	2A+B and 3B	Upper Confidence Bands
Wavelength	700.08	702.45	704.42	706.46	708.46	710.52	712.37	714.52	716.47	718.43	720.35	722.42	724.31	726.41	730.35	735.33	740.23	745.33
Intensity A	25.051	22.5545	16.4466	16.1362	16.0878	16.6156	11.0653	5.69325	6.75908	3.95267	3.36317	2.31825	2.05616	6.73564	NaN	NaN	727985	195892
Intensity B	28.032	22.5026	15.4006	15.6704	15.1244	21.5932	8.36605	4.08405	33682.2	8.04056	1.50551	50.9829	324.849	7.07333	NaN	NaN	2.22438e+07	30523.7
Background 1	15.8426	4.00242	6.10001	9.76138	-1.83691	14.9711	-6.8109	-2.99415	-2.78757	11.5774	-1.6069	-2.71551	-1.62791	8.6958	NaN	NaN	-6.17709	8.02925
Background 2	0.0448553	0.0310518	0.00453297	-0.0118407	0.0685794	0.366726	0.0979465	0.0437863	0.200593	0.0297655	0.0306941	0.0396461	0.0280392	0.0824217	NaN	NaN	0.104921	0.030289
A Peak Width	2.52695	2.43711	2.17676	2.11803	3.46198	9.27216	5.04911	4.92845	9.15526	9.18049	7.56974	6.78692	7.42631	13.0641	NaN	NaN	292843	94965.2
B Peak Width	1.05346	1.12708	1.1009	1.05685	1.14177	2.37085	1.15522	0.972388	69.5228	1.32267	0.93039	1.68912	4.1946	78.9247	NaN	NaN	1.7893e+06	1.02032
A Peak Centre Shift	142.003	141.79	141.222	141.065	140.826	142.861	141.255	141.271	143.72	144.439	142.873	142.855	143.629	147.962	NaN	NaN	8755.41	1992.67
B Peak Centre Shift	153.526	153.5	153.056	152.847	152.445	153.58	152.674	152.664	168.049	153.821	153.107	152.749	153.004	184.418	NaN	NaN	11878.7	151.809
50K	ORD	2A+B and 3B	Lower Confidence Bands
Wavelength	700.08	702.45	704.42	706.46	708.46	710.52	712.37	714.52	716.47	718.43	720.35	722.42	724.31	726.41	730.35	735.33	740.23	745.33
Intensity A	20.7953	21.2828	15.4672	15.1851	15.0268	3.02126	10.1459	5.244	0.306535	0.445307	2.99062	1.94874	1.73731	-3.28959	NaN	NaN	-727985	-195892
Intensity B	22.2153	20.7143	14.08	14.3932	13.4063	-6.25224	6.95861	3.12573	-33669.6	-4.93621	0.410316	-48.0332	-321.012	-5.69968	NaN	NaN	-2.22438e+07	-29903
Background 1	-2.93509	-0.662143	2.51787	6.11863	-6.29503	-54.1398	-12.0069	-4.95678	-27.1297	-2.30991	-3.18147	-4.25295	-2.98891	-8.46905	NaN	NaN	-13.2776	-3.34475
Background 2	-0.066404	0.00258923	-0.0172899	-0.0339559	0.0409493	-0.0546725	0.0667495	0.0313138	0.0443512	-0.0588667	0.0199917	0.0292858	0.0188868	-0.0751946	NaN	NaN	0.0555097	-0.0514549
A Peak Width	1.74197	2.17805	1.93157	1.87904	3.022	-1.6187	4.23816	4.15752	-2.54886	-2.03902	5.80374	4.64208	5.09438	-0.409507	NaN	NaN	-292843	-94965.1
B Peak Width	0.719627	0.991005	0.956684	0.924223	0.946871	-1.09933	0.864104	0.639836	-69.4729	-0.974689	0.0537286	-1.54152	-4.1058	-58.9247	NaN	NaN	-1.7893e+06	-0.980631
A Peak Centre Shift	141.651	141.661	141.1	140.949	140.614	138.139	140.929	140.91	137.737	138.803	142.136	141.89	142.626	140.638	NaN	NaN	-8470.33	-1707.98
B Peak Centre Shift	153.321	153.412	152.964	152.763	152.319	151.274	152.488	152.45	137.514	150.714	152.542	152.244	152.649	119.088	NaN	NaN	-11570.8	151.182
50K	VBG	2A+B and 3B	PeakData
Wavelength	690.61	692.13	694.2	696.33	698.25	700.19	702.23	704.32	706.33	708.26	710.18	712.39	714.47	716.33
Intensity A	9.54305	10.8913	9.62209	14.6659	14.3	19.5662	15.7122	17.9915	8.36987	7.87093	5.42127	3.92419	2.29529	2.89826
Intensity B	11.1641	13.0329	11.0965	17.4938	14.5671	17.9389	15.0778	16.8016	8.40685	7.52924	4.83094	2.9044	1.61249	1.70803
Background 1	-2.44676	-2.72352	-1.33157	-1.70048	-1.45603	-1.45108	-1.00859	-9.93532	-0.417033	-0.99373	-1.04957	-3.46969	-0.382884	-1.01918
Background 2	0.0242313	0.0260641	0.0172175	0.0242213	0.0220604	0.0283579	0.0244808	0.0965172	0.0139558	0.0193209	0.0162849	0.0382751	0.00778198	0.0144218
A Peak Width	3.14349	3.09664	2.88486	2.75164	2.57154	2.72973	2.69206	2.51051	2.88291	3.40624	3.88954	2.89957	4.28753	4.80598
B Peak Width	0.926671	0.858977	0.916535	0.87491	1.013	1.20659	1.10454	0.878981	1.038	0.957166	0.883659	0.534691	0.797973	0.602616
A Peak Centre Shift	141.988	141.931	141.976	142.185	141.604	141.547	141.564	140.624	141.066	140.766	141.196	140.439	141.511	141.834
B Peak Centre Shift	152.448	152.511	152.95	153.249	153.02	153.124	153.19	152.249	152.682	152.331	152.686	152.045	152.596	152.446
50K	VBG	2A+B and 3B	Upper Confidence Bands
Wavelength	690.61	692.13	694.2	696.33	698.25	700.19	702.23	704.32	706.33	708.26	710.18	712.39	714.47	716.33
Intensity A	9.80509	11.1609	9.86275	14.9956	14.6146	20.0007	16.1731	22.0008	8.67228	8.15907	5.65314	5.75004	2.44814	3.06221
Intensity B	11.5862	13.5345	11.5182	18.5547	15.0632	18.5857	15.7903	23.5199	8.90488	8.06381	5.30707	7.11013	1.95621	2.15466
Background 1	-1.95337	-2.14689	-0.897664	-1.10738	-0.890806	-0.707347	-0.207822	-2.98752	0.115523	-0.429454	-0.553695	-0.216352	-0.0458991	-0.634944
Background 2	0.0272502	0.0295855	0.0200086	0.0280223	0.0256612	0.0333599	0.0298252	0.142326	0.0176851	0.0232102	0.0196672	0.0630002	0.0102369	0.0171909
A Peak Width	3.29091	3.2343	3.00757	2.85655	2.66685	2.83052	2.82342	3.43789	3.05654	3.62218	4.18819	5.17963	4.81226	5.32812
B Peak Width	0.980042	0.908435	0.968789	0.926778	1.06483	1.27352	1.18414	1.40473	1.13272	1.06131	1.01692	1.70922	1.06149	0.84279
A Peak Centre Shift	142.094	142.007	142.048	142.247	141.661	141.607	141.642	141.184	141.17	140.891	141.363	141.783	141.798	142.108
B Peak Centre Shift	152.484	152.544	152.985	153.307	153.055	153.168	153.242	152.601	152.744	152.399	152.773	152.815	152.766	152.604
50K	VBG	2A+B and 3B	Lower Confidence Bands
Wavelength	690.61	692.13	694.2	696.33	698.25	700.19	702.23	704.32	706.33	708.26	710.18	712.39	714.47	716.33
Intensity A	9.28102	10.6216	9.38143	14.3361	13.9853	19.1318	15.2513	13.9821	8.06747	7.58278	5.18939	2.09835	2.14244	2.73431
Intensity B	10.7419	12.5312	10.6747	16.433	14.071	17.2922	14.3654	10.0832	7.90882	6.99468	4.35482	-1.30133	1.26877	1.2614
Background 1	-2.94015	-3.30014	-1.76547	-2.29359	-2.02126	-2.19482	-1.80937	-16.8831	-0.949589	-1.55801	-1.54545	-6.72303	-0.719869	-1.40341
Background 2	0.0212124	0.0225428	0.0144264	0.0204203	0.0184596	0.0233559	0.0191363	0.0507083	0.0102265	0.0154315	0.0129025	0.01355	0.00532708	0.0116528
A Peak Width	2.99607	2.95899	2.76215	2.64673	2.47622	2.62894	2.5607	1.58312	2.70928	3.1903	3.5909	0.619499	3.7628	4.28385
B Peak Width	0.873299	0.809519	0.864281	0.823042	0.961181	1.13966	1.02495	0.35323	0.943272	0.853026	0.750395	-0.639836	0.534454	0.362441
A Peak Centre Shift	141.882	141.854	141.904	142.123	141.548	141.486	141.485	140.065	140.962	140.641	141.029	139.095	141.225	141.559
B Peak Centre Shift	152.413	152.478	152.915	153.191	152.985	153.08	153.138	151.898	152.621	152.263	152.599	151.275	152.426	152.288
50K	ORD	3A+B and 4B	PeakData
Wavelength	700.08	702.45	704.42	706.46	708.46	710.52	712.37	714.52	716.47	718.43	720.35	722.42	724.31	726.41	730.35	735.33	740.23	745.33
Intensity A	16.5908	15.7581	10.9624	10.0382	9.31901	6.18346	6.55049	3.06329	2.0362	2.00357	1.55002	0.79717	0.719723	0.475	0.0468366	0.0745211	0.00375515	0.0460229
Intensity B	8.94694	7.98392	7.34536	4.90351	4.77151	2.49684	1.98187	0.78487	0.433493	5.81485e-08	0.1	2.16843e-10	1.78779e-11	4.85847e-09	3.86489e-09	3.05282e-08	1.29065e-09	2.65517e-07
Background 1	-1.31249	1.01032	1.00462	2.26754	13.2175	11.7243	5.32164	5.51283	10.7081	5.79879	7.36242	8.27359	4.55094	7.87956	10.4777	9.77003	9.77607	4.8948
Background 2	0.028763	0.0176905	0.0110259	0.00815592	-0.0399289	-0.040236	-0.00715453	-0.0184766	-0.0428995	-0.0212462	-0.0285063	-0.0337451	-0.014669	-0.0333148	-0.043683	-0.0424155	-0.0447946	-0.0219262
A Peak Width	2.10286	2.1339	2.05018	2.47864	1.9644	1.55812	2.32848	2.59727	1.08905	2.03988	1.83628	1.14765	0.169512	0.917506	0.0200987	0.0115601	0.00419527	0.00428254
B Peak Width	1.02524	0.952224	0.848053	0.960702	0.565056	0.452243	0.512373	0.59432	0.0516393	3.92244e-08	0.0278275	4.53273e-08	2.63712e-09	2.51842e-09	8.17406e-07	1.17926e-05	2.23301e-14	5.50776e-06
A Peak Centre Shift	192.482	192.357	191.932	191.537	191.129	191.243	191.143	190.941	191.208	190.473	191.356	191.558	191.364	193.101	191.041	189.734	189.416	192.178
B Peak Centre Shift	204.096	204.267	203.712	203.494	202.944	203.032	203.204	203.018	202.629	200.011	203.474	200.002	207	206.999	206.994	200.056	200	201.494
50K	ORD	3A+B and 4B	Upper Confidence Bands
Wavelength	700.08	702.45	704.42	706.46	708.46	710.52	712.37	714.52	716.47	718.43	720.35	722.42	724.31	726.41	730.35	735.33	740.23	745.33
Intensity A	17.949	16.988	11.8345	10.8185	17.7484	12.4108	8.9643	3.37076	5.88486	NaN	2.04157	NaN	NaN	NaN	NaN	NaN	NaN	NaN
Intensity B	10.8669	9.81623	12.8204	6.14298	20.4012	14.1435	7.08207	1.42443	1044.57	NaN	3513.41	NaN	NaN	NaN	NaN	NaN	NaN	NaN
Background 1	0.444195	2.50535	2.06007	3.33432	22.9319	18.1598	8.45535	5.91987	14.0117	NaN	7.90841	NaN	NaN	NaN	NaN	NaN	NaN	NaN
Background 2	0.0368158	0.0247947	0.0160391	0.013194	0.00772007	-0.00857219	0.00815895	-0.0164178	-0.0261069	NaN	-0.0256419	NaN	NaN	NaN	NaN	NaN	NaN	NaN
A Peak Width	2.41017	2.39383	2.30448	2.79352	4.69644	3.92994	3.67224	3.00718	4.12982	NaN	2.72355	NaN	NaN	NaN	NaN	NaN	NaN	NaN
B Peak Width	1.35079	1.27316	1.33393	1.31816	3.24109	3.50495	2.41311	1.29921	73.6209	NaN	13.2763	NaN	NaN	NaN	NaN	NaN	NaN	NaN
A Peak Centre Shift	192.692	192.523	192.095	191.73	192.905	192.812	192.001	191.201	193.266	NaN	191.939	NaN	NaN	NaN	NaN	NaN	NaN	NaN
B Peak Centre Shift	204.316	204.485	204.072	203.736	204.801	205.1	204.534	203.501	241.831	NaN	204.731	NaN	NaN	NaN	NaN	NaN	NaN	NaN
50K	ORD	3A+B and 4B	Lower Confidence Bands
Wavelength	700.08	702.45	704.42	706.46	708.46	710.52	712.37	714.52	716.47	718.43	720.35	722.42	724.31	726.41	730.35	735.33	740.23	745.33
Intensity A	15.2327	14.5282	10.0902	9.25791	0.889583	-0.0438502	4.13669	2.75581	-1.81246	NaN	1.05848	NaN	NaN	NaN	NaN	NaN	NaN	NaN
Intensity B	7.02697	6.15161	1.87034	3.66403	-10.8582	-9.14979	-3.11834	0.145309	-1043.71	NaN	-3505.71	NaN	NaN	NaN	NaN	NaN	NaN	NaN
Background 1	-3.06918	-0.48471	-0.0508423	1.20076	3.50317	5.28874	2.18794	5.10579	7.40443	NaN	6.81642	NaN	NaN	NaN	NaN	NaN	NaN	NaN
Background 2	0.0207101	0.0105863	0.00601267	0.00311784	-0.0875779	-0.0718998	-0.022468	-0.0205353	-0.0596921	NaN	-0.0313708	NaN	NaN	NaN	NaN	NaN	NaN	NaN
A Peak Width	1.79556	1.87397	1.79587	2.16376	-0.767648	-0.813688	0.984715	2.18735	-1.95172	NaN	0.949012	NaN	NaN	NaN	NaN	NaN	NaN	NaN
B Peak Width	0.699692	0.631284	0.362175	0.603248	-2.11097	-2.60047	-1.38836	-0.110574	-73.5176	NaN	-13.2206	NaN	NaN	NaN	NaN	NaN	NaN	NaN
A Peak Centre Shift	192.272	192.19	191.769	191.344	189.354	189.675	190.286	190.68	189.151	NaN	190.774	NaN	NaN	NaN	NaN	NaN	NaN	NaN
B Peak Centre Shift	203.876	204.048	203.352	203.251	201.087	200.965	201.875	202.534	163.427	NaN	202.217	NaN	NaN	NaN	NaN	NaN	NaN	NaN
50K	VBG	3A+B and 4B	PeakData
Wavelength	690.61	692.13	694.2	696.33	698.25	700.19	702.23	704.32	706.33	708.26	710.18	712.39	714.47	716.33
Intensity A	6.38972	7.02421	7.28402	10.625	10.022	14.1805	10.9536	11.8163	5.7975	5.56501	3.81987	2.55782	1.52606	1.84337
Intensity B	4.75235	4.91087	4.05856	5.72371	5.65623	6.48887	5.08998	5.30569	3.0567	2.58544	1.37193	0.705245	0.565299	0.788721
Background 1	-1.96094	-2.68566	-1.24972	-1.49951	-1.62639	-0.976439	0.364714	7.01681	2.0542	2.71291	2.4176	5.69176	2.26263	3.56075
Background 2	0.0183943	0.022466	0.015187	0.0206799	0.0207213	0.0236299	0.0148067	-0.0112699	-0.000764613	-0.00286826	-0.00412114	-0.020125	-0.00716736	-0.0119817
A Peak Width	3.22297	3.0491	2.46704	2.38397	2.33944	2.28429	2.22993	1.8213	2.20642	2.21146	2.13872	1.74706	2.39702	2.05069
B Peak Width	0.791461	0.836125	0.870368	0.941607	0.928196	1.06768	0.966898	0.815691	1.12036	0.9428	0.897395	0.522672	0.410487	0.233987
A Peak Centre Shift	192.62	192.445	192.501	192.677	192.181	192.202	192.274	191.262	191.515	191.042	191.311	190.649	191.268	191.216
B Peak Centre Shift	203.201	203.244	203.721	204.051	203.696	203.918	203.917	202.881	203.387	202.913	203.266	202.758	203.144	203.028
50K	VBG	3A+B and 4B	Upper Confidence Bands
Wavelength	690.61	692.13	694.2	696.33	698.25	700.19	702.23	704.32	706.33	708.26	710.18	712.39	714.47	716.33
Intensity A	6.97694	8.05887	7.92366	11.4556	10.8162	15.2621	11.789	15.7739	6.16853	5.92704	4.11861	4.65267	1.72902	2.12328
Intensity B	5.92069	6.861	5.12824	7.03694	6.90902	8.06281	6.35218	11.1982	3.57496	3.13715	1.83094	4.5327	1.04347	1.81472
Background 1	-0.966299	-0.968633	-0.395238	-0.395914	-0.560234	0.368284	1.40433	11.5224	2.50106	3.15676	2.78162	7.87761	2.51993	3.89236
Background 2	0.0227879	0.0300606	0.0191103	0.02575	0.0256153	0.030011	0.0197413	0.0101572	0.00142831	-0.000694321	-0.00233665	-0.00879155	-0.00586507	-0.0103023
A Peak Width	3.73606	3.81882	2.81548	2.68264	2.63671	2.55843	2.49688	2.76241	2.42605	2.43545	2.39822	3.91195	2.89364	2.52919
B Peak Width	1.07962	1.32741	1.20715	1.2595	1.23048	1.45025	1.3196	2.13769	1.40205	1.23881	1.33813	4.64486	0.906663	0.664311
A Peak Centre Shift	192.916	192.893	192.717	192.864	192.366	192.376	192.444	191.871	191.656	191.186	191.478	192.079	191.586	191.528
B Peak Centre Shift	203.396	203.577	203.951	204.267	203.902	204.177	204.157	203.787	203.577	203.114	203.566	205.58	203.506	203.291
50K	VBG	3A+B and 4B	Lower Confidence Bands
Wavelength	690.61	692.13	694.2	696.33	698.25	700.19	702.23	704.32	706.33	708.26	710.18	712.39	714.47	716.33
Intensity A	5.8025	5.98956	6.64439	9.79438	9.2278	13.0988	10.1182	7.85863	5.42648	5.20298	3.52113	0.462968	1.32311	1.56346
Intensity B	3.584	2.96073	2.98887	4.41047	4.40344	4.91493	3.82779	-0.586805	2.53844	2.03373	0.912928	-3.12221	0.0871235	-0.237276
Background 1	-2.95558	-4.40269	-2.10419	-2.6031	-2.69255	-2.32116	-0.674899	2.51125	1.60734	2.26907	2.05357	3.50591	2.00534	3.22914
Background 2	0.0140007	0.0148714	0.0112638	0.0156097	0.0158274	0.0172489	0.00987216	-0.0326969	-0.00295753	-0.0050422	-0.00590563	-0.0314585	-0.00846965	-0.0136611
A Peak Width	2.70988	2.27937	2.1186	2.0853	2.04216	2.01015	1.96299	0.880184	1.98679	1.98747	1.87923	-0.417826	1.9004	1.5722
B Peak Width	0.503301	0.344843	0.533582	0.623714	0.625914	0.6851	0.614199	-0.506304	0.83867	0.646795	0.456663	-3.59951	-0.08569	-0.196337
A Peak Centre Shift	192.324	191.996	192.285	192.491	191.996	192.028	192.104	190.652	191.374	190.898	191.144	189.219	190.949	190.905
B Peak Centre Shift	203.006	202.912	203.492	203.835	203.49	203.659	203.677	201.975	203.197	202.712	202.966	199.937	202.782	202.765

## Sheet: 100K
Temperature	Filter	Mode	Data Type
100K	ORD	A and B	PeakData
Wavelength	700.4	702.41	704.35	706.4	708.51	710.37	712.44	714.43	716.36	718.56	720.5	722.44	724.47	726.26	728.35	730.36	735.06	740.38	745.42
Intensity A	13.1834	13.2878	16.7939	15.6053	16.6507	21.7352	23.4388	24.4269	27.4092	25.2217	25.1623	18.5276	21.0778	18.0845	16.648	17.7766	10.3687	3.26144	3.4725
Intensity B	125.037	109.847	118.904	104.501	98.3156	100.241	90.7632	80.6418	74.4881	52.7865	44.6737	27.7308	27.2497	17.5981	12.6785	10.1635	4.6434	1.49378	0.699225
Background 1	3.39575	2.53252	3.33408	4.1974	3.12708	3.817	3.81983	4.26214	3.97154	3.35327	2.79109	2.33005	2.53358	1.88547	4.53646	2.0096	1.28748	0.697264	0.675574
Background 2	-0.0107892	-0.00115141	-0.00892328	-0.014181	-0.0035542	-0.0124498	-0.015242	-0.0240289	-0.0151844	-0.0160716	-0.0069734	-0.0109089	-0.012825	-0.00884296	-0.0501724	-0.013012	-0.00792274	-0.00636299	-0.00531197
A Peak Width	0.723193	0.755936	0.746961	0.760255	0.743368	0.759229	0.716168	0.699607	0.724739	0.715651	0.764186	0.747033	0.754975	0.730498	0.678021	0.719788	0.731128	0.861165	0.746384
B Peak Width	0.564098	0.569577	0.574468	0.586609	0.573807	0.564656	0.555391	0.556239	0.547724	0.545386	0.549303	0.555813	0.555677	0.516211	0.467872	0.545904	0.4872	0.20201	0.539001
A Peak Centre Shift	45.9832	46.098	45.8007	45.8326	45.8936	45.6158	45.6798	45.7778	45.5721	45.3197	45.7487	45.4386	45.7782	45.848	46.048	46.0126	45.8569	45.6219	45.5913
B Peak Centre Shift	51.1326	51.2532	50.9766	51.0154	51.0669	50.7795	50.8377	50.9583	50.7347	50.4824	50.9301	50.5951	50.9387	51.0076	51.2087	51.1647	50.9863	50.8144	50.6486
100K	ORD	A and B	Upper Confidence Bands
Wavelength	700.4	702.41	704.35	706.4	708.51	710.37	712.44	714.43	716.36	718.56	720.5	722.44	724.47	726.26	728.35	730.36	735.06	740.38	745.42
Intensity A	14.9083	14.6411	18.48	17.0917	17.9612	23.0516	24.8134	25.431	28.4902	25.9308	25.7838	18.9821	21.6224	18.5047	22.736	18.1422	10.6941	3.5393	3.72877
Intensity B	126.996	111.41	120.818	106.195	99.8069	101.761	92.3257	81.7681	75.73	53.5992	45.4031	28.2583	27.8828	18.0971	20.0285	10.5831	5.03975	2.48554	1.0004
Background 1	4.4237	3.26159	4.29522	5.11306	3.83214	4.5764	4.63702	4.88996	4.57705	3.77595	3.13044	2.5884	2.86107	2.1085	7.78447	2.22067	1.47079	0.864586	0.835374
Background 2	0.00649508	0.0122039	0.00811886	0.00154406	0.00969959	0.00136716	-0.000812272	-0.0132512	-0.00380348	-0.00840771	-0.000148725	-0.00589276	-0.00665928	-0.00414203	0.0159517	-0.0088581	-0.00407571	-0.00266674	-0.00204788
A Peak Width	0.868942	0.872771	0.861523	0.872032	0.831937	0.829446	0.780462	0.743919	0.768067	0.746381	0.79271	0.774823	0.784709	0.756042	1.04968	0.742165	0.76573	0.973205	0.830039
B Peak Width	0.577242	0.581591	0.588137	0.600763	0.586727	0.577333	0.569586	0.567785	0.561253	0.557836	0.562626	0.57153	0.57481	0.538022	0.869942	0.579441	0.548876	0.38439	0.886313
A Peak Centre Shift	46.0777	46.175	45.8756	45.905	45.9521	45.6618	45.7218	45.8065	45.6007	45.3398	45.7676	45.4569	45.7977	45.8649	46.2955	46.0274	45.8799	45.6951	45.6464
B Peak Centre Shift	51.1414	51.2612	50.9859	51.0248	51.0756	50.7881	50.8472	50.966	50.7438	50.4908	50.9391	50.6056	50.9516	51.0222	51.4773	51.1872	51.0282	50.8789	50.8805
100K	ORD	A and B	Lower Confidence Bands
Wavelength	700.4	702.41	704.35	706.4	708.51	710.37	712.44	714.43	716.36	718.56	720.5	722.44	724.47	726.26	728.35	730.36	735.06	740.38	745.42
Intensity A	11.4586	11.9344	15.1078	14.119	15.3403	20.4187	22.0641	23.4227	26.3283	24.5126	24.5408	18.0731	20.5332	17.6642	10.56	17.4109	10.0433	2.98358	3.21622
Intensity B	123.077	108.285	116.991	102.807	96.8243	98.7203	89.2006	79.5154	73.2463	51.9738	43.9443	27.2033	26.6167	17.0992	5.32844	9.74386	4.24706	0.502013	0.39805
Background 1	2.36781	1.80344	2.37294	3.28174	2.42203	3.0576	3.00264	3.63432	3.36604	2.93059	2.45175	2.0717	2.20609	1.66243	1.28844	1.79852	1.10417	0.529941	0.515774
Background 2	-0.0280736	-0.0145068	-0.0259654	-0.0299061	-0.016808	-0.0262667	-0.0296718	-0.0348066	-0.0265654	-0.0237354	-0.0137981	-0.015925	-0.0189906	-0.0135439	-0.116297	-0.017166	-0.0117698	-0.0100592	-0.00857606
A Peak Width	0.577445	0.639102	0.632398	0.648478	0.6548	0.689012	0.651874	0.655294	0.681412	0.684922	0.735662	0.719243	0.725242	0.704954	0.306367	0.697412	0.696526	0.749124	0.662729
B Peak Width	0.550954	0.557562	0.560798	0.572455	0.560888	0.551979	0.541196	0.544692	0.534194	0.532935	0.53598	0.540097	0.536544	0.4944	0.0658026	0.512368	0.425524	0.0196295	0.191688
A Peak Centre Shift	45.8888	46.0211	45.7258	45.7602	45.8351	45.5699	45.6378	45.749	45.5435	45.2996	45.7298	45.4203	45.7587	45.831	45.8004	45.9978	45.834	45.5486	45.5363
B Peak Centre Shift	51.1239	51.2451	50.9673	51.0059	51.0582	50.7709	50.8282	50.9505	50.7256	50.4741	50.9211	50.5845	50.9257	50.993	50.9401	51.1422	50.9444	50.7498	50.4168
100K	VBG	A and B	PeakData
Wavelength	690.5	692.25	694.2	696.25	698.32	700.29	702.21	704.21	706.32	708.32	710.33	712.39	714.3	716.25
Intensity A	3.16784	3.32494	3.83895	6.11714	5.67872	8.9249	8.10892	10.7327	10.7617	12.9611	11.3192	12.98	8.97208	12.5485
Intensity B	46.5013	45.2135	52.8525	71.2566	62.9656	86.2508	72.5252	78.3026	66.2838	69.7751	54.3962	46.2733	26.9674	32.8775
Background 1	0.909083	0.981714	2.5884	1.39137	1.38263	1.60911	1.57473	1.9526	1.54895	1.91464	1.78978	1.86823	2.41319	1.38458
Background 2	-0.00189834	-0.00332271	-0.025925	-0.00065454	-0.0024522	0.00309555	-0.000567712	-0.00418243	0.00237474	-0.00214369	-0.00357636	-0.00672042	-0.0198673	-0.00344492
A Peak Width	0.881127	0.790785	0.572257	0.785265	0.855436	0.75307	0.75934	0.736642	0.76259	0.752918	0.746906	0.723555	0.704551	0.720309
B Peak Width	0.58101	0.559153	0.564451	0.562785	0.605065	0.573634	0.568258	0.572229	0.631817	0.571387	0.556286	0.577039	0.58884	0.539562
A Peak Centre Shift	45.8349	45.5332	46.1835	45.9653	46.2088	46.2866	46.4559	46.2287	45.674	45.3564	45.4511	45.5548	45.6633	45.7485
B Peak Centre Shift	51.0764	50.7242	51.2814	51.1252	51.4245	51.4591	51.5711	51.3786	50.8512	50.5434	50.6164	50.7119	50.8126	50.9184
100K	VBG	A and B	Upper Confidence Bands
Wavelength	690.5	692.25	694.2	696.25	698.32	700.29	702.21	704.21	706.32	708.32	710.33	712.39	714.3	716.25
Intensity A	3.93368	4.00308	8.17466	7.17518	6.50724	10.0221	9.2352	11.8714	11.727	13.9728	12.061	13.6567	15.0695	13.0359
Intensity B	47.4458	46.0226	57.2235	72.4986	63.9497	87.5028	73.8218	79.5944	67.3449	70.9319	55.2564	47.0302	33.6349	33.4392
Background 1	1.2898	1.31761	4.22217	1.88714	1.81202	2.0909	2.09485	2.49833	1.9816	2.38885	2.15399	2.21328	5.1778	1.61863
Background 2	0.00493774	0.00255087	0.00556671	0.00851488	0.00521872	0.012573	0.00934014	0.00586933	0.0111007	0.00706922	0.00327358	-0.000430589	0.0358245	0.00111642
A Peak Width	1.20614	1.0361	1.52443	0.990286	1.04608	0.891753	0.91789	0.854363	0.865341	0.841313	0.820727	0.780632	1.42101	0.762291
B Peak Width	0.598525	0.57395	0.633211	0.577225	0.619097	0.585941	0.583254	0.586187	0.646912	0.585378	0.569297	0.591001	0.805026	0.553175
A Peak Centre Shift	46.0478	45.6944	46.833	46.1011	46.3336	46.3791	46.5614	46.3067	45.7424	45.4152	45.5	45.5925	46.142	45.7765
B Peak Centre Shift	51.0881	50.7341	51.3281	51.1351	51.434	51.4675	51.5813	51.388	50.8613	50.5529	50.6252	50.7213	50.9581	50.9276
100K	VBG	A and B	Lower Confidence Bands
Wavelength	690.5	692.25	694.2	696.25	698.32	700.29	702.21	704.21	706.32	708.32	710.33	712.39	714.3	716.25
Intensity A	2.40201	2.64679	-0.496764	5.0591	4.8502	7.82774	6.98263	9.59398	9.79635	11.9494	10.5774	12.3033	2.87466	12.0611
Intensity B	45.5568	44.4045	48.4815	70.0145	61.9815	84.9988	71.2286	77.0107	65.2227	68.6182	53.5359	45.5164	20.2998	32.3158
Background 1	0.528364	0.645814	0.954637	0.8956	0.953245	1.12732	1.05461	1.40688	1.11631	1.44043	1.42557	1.52317	-0.351414	1.15053
Background 2	-0.00873442	-0.00919629	-0.0574166	-0.00982396	-0.0101231	-0.00638187	-0.0104756	-0.0142342	-0.0063512	-0.0113566	-0.0104263	-0.0130102	-0.0755591	-0.00800626
A Peak Width	0.556114	0.545473	-0.379916	0.580244	0.664794	0.614386	0.60079	0.61892	0.65984	0.664524	0.673085	0.666479	-0.0119044	0.678327
B Peak Width	0.563495	0.544357	0.495691	0.548345	0.591034	0.561327	0.553262	0.558271	0.616722	0.557395	0.543276	0.563077	0.372654	0.525949
A Peak Centre Shift	45.622	45.3719	45.5341	45.8294	46.0839	46.194	46.3504	46.1506	45.6055	45.2976	45.4022	45.5171	45.1846	45.7205
B Peak Centre Shift	51.0647	50.7143	51.2346	51.1153	51.4151	51.4507	51.5609	51.3692	50.8411	50.5339	50.6077	50.7025	50.6671	50.9091
100K	ORD	2A and 2B	Peakdata
Wavelength	700.4	702.41	704.35	706.4	708.51	710.37	712.44	714.43	716.36	718.56	720.5	722.44	724.47	726.26	728.35	730.36	735.06	740.38	745.42
Intensity A	5.28364	5.07875	5.97221	5.57883	5.51275	7.44479	6.74348	6.50442	6.54414	5.23735	6.05588	3.89722	4.15922	3.53606	3.25621	2.93367	1.74233	0.512669	0.436514
Intensity B	33.0747	28.5642	30.5731	28.5515	24.9755	23.9993	21.7967	18.1129	15.8259	10.7501	8.63224	4.98564	5.04309	3.34737	2.23548	1.8752	0.572991	0.318401	0.283191
Background 1	-0.912192	0.529886	0.980613	1.58871	1.66977	1.53464	2.10386	1.80073	2.04952	0.470919	1.56215	1.15846	1.16822	0.796107	-0.23136	0.750099	0.442242	0.431407	0.315588
Background 2	0.0379239	0.0204721	0.0204095	0.019933	0.0136515	0.0162149	0.00874752	0.010636	0.0108811	0.0212776	0.00773609	0.00463479	0.00548667	0.00566717	0.0191133	0.0050574	0.00369486	-0.000634845	-1.98731e-05
A Peak Width	3.49483	3.02918	2.93115	2.7326	2.49187	2.62541	2.03351	2.07163	1.87565	1.90808	1.60193	1.8074	1.84492	1.52943	1.10795	1.63219	1.32692	1.1088	2.37894
B Peak Width	0.836189	0.889328	0.886475	0.846466	0.875249	0.864731	0.876101	0.903527	0.896345	0.919476	0.999572	1.16747	1.06552	0.937437	0.582454	1.15669	1.62873	0.55876	1.0081
A Peak Centre Shift	91.2211	91.4678	91.0647	91.0006	91.0606	91.571	90.848	90.993	90.8075	90.4695	91.12	90.7892	91.0757	91.2185	91.4051	91.4788	91.1588	90.6527	91.2407
B Peak Centre Shift	101.705	101.826	101.526	101.565	101.629	101.328	101.425	101.511	101.279	101.003	101.488	101.184	101.426	101.502	101.672	101.592	101.1	101.217	102.675
100K	ORD	2A and 2B	Upper Confidence Bands
Wavelength	700.4	702.41	704.35	706.4	708.51	710.37	712.44	714.43	716.36	718.56	720.5	722.44	724.47	726.26	728.35	730.36	735.06	740.38	745.42
Intensity A	5.78254	5.36556	6.32561	5.9531	5.8485	8.42736	7.12769	6.84849	6.90939	6.267	6.35524	4.13222	4.39393	3.76512	5.26782	3.14185	1.94747	0.991704	0.579767
Intensity B	34.0428	29.0833	31.1978	29.2103	25.5362	25.6886	22.3773	18.6292	16.3513	12.2238	9.01741	5.27668	5.35031	3.63889	4.98921	2.12161	0.75845	0.992557	0.500863
Background 1	0.0911097	0.956561	1.52735	2.17702	2.09576	2.86324	2.57414	2.24669	2.44373	1.6509	1.84343	1.40245	1.42201	1.00667	1.35642	0.958126	0.630713	0.826622	0.503498
Background 2	0.0462919	0.0242743	0.0252198	0.0250667	0.0176209	0.028433	0.0130575	0.01467	0.0146947	0.0324912	0.010635	0.00710365	0.00801689	0.00794378	0.0360067	0.00724985	0.00583692	0.00393978	0.00214628
A Peak Width	4.13698	3.33485	3.24836	3.0614	2.74836	3.22267	2.2264	2.25639	2.04423	2.51988	1.72567	1.9808	2.01156	1.68297	2.15108	1.81365	1.56729	2.69082	3.66861
B Peak Width	0.87305	0.913594	0.913668	0.875608	0.904575	0.955983	0.910856	0.94197	0.940808	1.10793	1.07369	1.27179	1.1641	1.06212	1.64527	1.39169	2.49477	2.3543	2.25153
A Peak Centre Shift	91.5441	91.6387	91.2378	91.1827	91.2122	91.9176	90.9636	91.1022	90.9121	90.844	91.199	90.8981	91.1797	91.3174	92.0866	91.5946	91.315	91.6886	92.018
B Peak Centre Shift	101.729	101.843	101.544	101.584	101.649	101.389	101.448	101.536	101.309	101.129	101.533	101.252	101.491	101.584	102.39	101.744	101.626	102.396	103.45
100K	ORD	2A and 2B	Lower Confidence Bands
Wavelength	700.4	702.41	704.35	706.4	708.51	710.37	712.44	714.43	716.36	718.56	720.5	722.44	724.47	726.26	728.35	730.36	735.06	740.38	745.42
Intensity A	4.78473	4.79195	5.61881	5.20457	5.17701	6.46222	6.35927	6.16035	6.17889	4.20771	5.75653	3.66222	3.9245	3.307	1.24459	2.7255	1.53718	0.0336332	0.293261
Intensity B	32.1066	28.0451	29.9484	27.8927	24.4148	22.31	21.216	17.5966	15.3005	9.2765	8.24707	4.69461	4.73586	3.05584	-0.518247	1.62878	0.387533	-0.355755	0.0655189
Background 1	-1.91549	0.10321	0.433874	1.00039	1.24377	0.20603	1.63358	1.35477	1.65531	-0.70906	1.28086	0.914473	0.914441	0.585541	-1.81914	0.542071	0.25377	0.0361921	0.127679
Background 2	0.0295559	0.0166699	0.0155992	0.0147993	0.00968212	0.00399676	0.00443755	0.00660212	0.00706756	0.010064	0.00483721	0.00216592	0.00295645	0.00339055	0.00221992	0.00286495	0.0015528	-0.00520947	-0.00218603
A Peak Width	2.85268	2.72351	2.61394	2.4038	2.23539	2.02815	1.84062	1.88687	1.70707	1.29627	1.4782	1.63401	1.67827	1.37589	0.0648173	1.45073	1.08655	-0.473227	1.08927
B Peak Width	0.799328	0.865061	0.859281	0.817323	0.845924	0.77348	0.841346	0.865084	0.851881	0.731026	0.925452	1.06316	0.966932	0.812756	-0.480357	0.921683	0.762685	-1.23678	-0.235337
A Peak Centre Shift	90.8982	91.2969	90.8916	90.8185	90.909	91.2244	90.7324	90.8837	90.7029	90.095	91.041	90.6803	90.9716	91.1195	90.7237	91.3631	91.0026	89.6168	90.4634
B Peak Centre Shift	101.68	101.81	101.508	101.545	101.609	101.268	101.401	101.485	101.25	100.877	101.443	101.115	101.361	101.421	100.955	101.44	100.573	100.037	101.901
100K	VBG	2A and 2B	PeakData
Wavelength	690.5	692.25	694.2	696.25	698.32	700.29	702.21	704.21	706.32	708.32	710.33	712.39	714.3	716.25
Intensity A	1.65162	1.64461	1.76653	2.68872	2.38822	3.83593	3.19206	4.01391	4.04198	4.19487	3.24117	3.4556	1.4984	3.0254
Intensity B	14.3767	13.0798	16.3392	21.0095	18.9419	24.2192	19.6051	29.6514	18.0439	17.7282	12.9435	10.8878	3.22407	6.91349
Background 1	-1.11469	-1.23762	-0.311202	-3.10479	-0.936753	0.306784	0.535166	-0.698569	0.820915	0.977429	0.94778	0.833523	0.777637	0.444471
Background 2	0.019668	0.0205892	0.0139074	0.0464661	0.0257243	0.0160473	0.0112826	0.0253557	0.0103519	0.00939265	0.00685434	0.00688521	0.00596708	0.00662707
A Peak Width	5.59887	4.54107	5.15716	-4.88654	3.89049	3.34103	3.13798	1.60651	-2.34625	2.35973	2.52151	-2.14037	0.00971199	-3.67529
B Peak Width	0.741199	0.818648	0.750619	0.753587	0.840928	0.846865	0.854894	1.42182	0.916834	0.886818	0.861575	0.921885	1.38786	0.813561
A Peak Centre Shift	91.9536	91.0669	92.534	91.2533	91.986	91.9234	91.872	91.3167	90.9829	90.689	90.8674	90.9448	90.0687	92.1996
B Peak Centre Shift	101.593	101.247	101.825	101.653	101.951	102.039	102.143	101.007	101.434	101.115	101.193	101.257	101.3	101.527
100K	VBG	2A and 2B	Upper Confidence Bands
Wavelength	690.5	692.25	694.2	696.25	698.32	700.29	702.21	704.21	706.32	708.32	710.33	712.39	714.3	716.25
Intensity A	1.85526	1.90061	1.92933	4.1207	3.73243	4.10664	3.43775	6.29726	4.30241	4.4654	3.46502	3.67857	108178	3.49102
Intensity B	14.857	13.616	16.7406	24.3537	21.696	24.7456	20.0657	32.3131	18.4568	18.1652	13.3218	11.2244	3.92962	7.88166
Background 1	-0.560757	-0.602163	0.0412196	0.219774	1.72944	0.711241	0.903398	1.63889	1.12475	1.31031	1.248	1.11471	1.37071	1.18507
Background 2	0.0240515	0.025704	0.0168389	0.0738805	0.0480785	0.0196814	0.0145646	0.0466121	0.0132366	0.0125012	0.0096111	0.00945717	0.0120105	0.0135638
A Peak Width	7.17928	6.03847	6.20413	0.640651	8.24198	3.79375	3.58637	3.08213	-2.09558	2.61496	2.81989	-1.90862	353.006	-2.61693
B Peak Width	0.78053	0.87027	0.779849	0.937582	1.02722	0.874707	0.885066	1.61097	0.948226	0.919445	0.899154	0.964484	1.85526	0.988358
A Peak Centre Shift	92.6108	91.7369	93.0218	93.8023	94.1609	92.1732	92.1182	92.2311	91.134	90.841	91.0413	91.0826	166.429	92.7736
B Peak Centre Shift	101.618	101.281	101.844	101.773	102.074	102.058	102.163	101.168	101.455	101.136	101.219	101.285	101.604	101.641
100K	VBG	2A and 2B	Lower Confidence Bands
Wavelength	690.5	692.25	694.2	696.25	698.32	700.29	702.21	704.21	706.32	708.32	710.33	712.39	714.3	716.25
Intensity A	1.44798	1.38861	1.60374	1.25674	1.044	3.56522	2.94637	1.73056	3.78155	3.92433	3.01732	3.23262	-108175	2.55977
Intensity B	13.8964	12.5436	15.9378	17.6654	16.1878	23.6928	19.1445	26.9897	17.631	17.2911	12.5653	10.5512	2.51852	5.94531
Background 1	-1.66863	-1.87308	-0.663623	-6.42936	-3.60295	-0.0976732	0.166934	-3.03603	0.51708	0.64455	0.647559	0.552334	0.184565	-0.296127
Background 2	0.0152845	0.0154744	0.0109759	0.0190517	0.00337008	0.0124132	0.00800052	0.00409922	0.00746725	0.00628411	0.00409757	0.00431324	-7.63097e-05	-0.000309645
A Peak Width	4.01845	3.04367	4.11018	-10.4137	-0.461012	2.8883	2.68959	0.130881	-2.59693	2.1045	2.22313	-2.37211	-352.987	-4.73365
B Peak Width	0.701868	0.767026	0.721389	0.569591	0.654632	0.819023	0.824722	1.23267	0.885443	0.85419	0.823996	0.879285	0.92045	0.638765
A Peak Centre Shift	91.2964	90.3968	92.0463	88.7043	89.8111	91.6736	91.6259	90.4022	90.8319	90.537	90.6935	90.807	13.708	91.6256
B Peak Centre Shift	101.568	101.214	101.807	101.533	101.828	102.021	102.123	100.846	101.413	101.093	101.168	101.228	100.997	101.413
100K	ORD	2A+B and 3B	PeakData
Wavelength	700.4	702.41	704.35	706.4	708.51	710.37	712.44	714.43	716.36	718.56	720.5	722.44	724.47	726.26	728.35	730.36	735.06	740.38	745.42
Intensity A	12.499	9.17869	8.68532	8.16777	7.58032	7.23399	6.07373	5.48079	5.22215	3.78852	3.36166	2.62919	2.78437	1.90637	0.542037	1.55571	1.37151	0.359664	0.517041
Intensity B	10.7396	8.45549	8.43045	8.07493	7.0134	6.31709	5.01116	4.2434	3.40029	2.27133	1.46046	0.999293	1.09995	1.04765	0.19542	0.447576	3.08828	0.00111611	1.42635
Background 1	-21.3448	-7.80023	0.0169491	0.297432	-3.38952	-3.22543	-1.21928	-0.665	-5.5787	-3.81988	-7.30923	-3.34705	-3.69941	-1.16737	-4.20436	-2.01011	0.496749	-1.3553	-1.65703
Background 2	0.150487	0.0692991	0.030793	0.0273721	0.0449487	0.0475135	0.0320129	0.0302493	0.0650577	0.049402	0.0742838	0.0366628	0.0389422	0.0188019	0.0471734	0.0246965	0.00113669	0.0138928	0.016879
A Peak Width	5.5395	5.02512	3.54281	3.57932	4.84201	4.85652	5.39981	4.66141	5.24307	5.49235	5.13503	7.26721	7.66848	8.31646	0.377211	9.49198	10.3077	0.121853	0.261724
B Peak Width	1.2434	1.10923	1.04116	-1.04351	0.938155	0.988429	0.9929	0.81526	0.712512	0.58599	0.446284	0.510396	0.57256	0.69572	0.00491909	0.641219	0.0364396	0.000140922	0.301561
A Peak Centre Shift	141.164	141.19	141.196	141.12	141.176	140.746	141.055	141.121	140.73	140.721	140.723	140.977	141.285	142.138	141.591	143.108	144.659	141.366	141.523
B Peak Centre Shift	152.291	152.433	152.034	152.096	152.213	151.974	152.027	152.027	151.752	151.419	152.105	151.933	151.984	151.947	152.493	152.633	151.973	154.839	152.5
100K	ORD	2A+B and 3B	Upper Confidence Bands
Wavelength	700.4	702.41	704.35	706.4	708.51	710.37	712.44	714.43	716.36	718.56	720.5	722.44	724.47	726.26	728.35	730.36	735.06	740.38	745.42
Intensity A	13.1016	9.61119	10.4499	8.56402	7.92902	7.60579	6.52749	5.90427	6.03842	4.34241	3.79338	2.81456	3.00459	2.20312	1.38814	1.92363	2.95212	NaN	0.964727
Intensity B	11.4906	9.06394	11.1183	8.53305	7.63902	6.91895	5.53702	4.98452	5.2161	3.57166	2.81919	1.47126	1.58728	1.44247	1.47829e+06	0.845175	448.197	NaN	220895
Background 1	-18.8786	-5.87619	6.80609	2.28274	-1.89206	-1.57227	0.99472	1.26386	-2.10482	-1.29513	-5.80396	-2.49335	-2.68926	-0.0267886	-3.14116	-0.774435	5.65921	NaN	-0.25307
Background 2	0.164112	0.0801161	0.0694718	0.0389098	0.0535432	0.0569737	0.0446011	0.0412926	0.08532	0.0640287	0.0834236	0.0423515	0.0455609	0.0284804	0.0549207	0.0354168	0.0478606	NaN	0.028834
A Peak Width	6.02671	5.46695	4.92687	3.86409	5.30615	5.38454	6.11495	5.37862	6.99766	7.20597	6.50107	8.37208	9.02352	10.3354	1.23359	12.6469	18.7544	NaN	0.604076
B Peak Width	1.39283	1.23752	1.56452	-0.943448	1.06804	1.13545	1.16411	1.03495	1.2932	1.09542	1.06345	0.89072	0.980457	1.16732	18639.7	1.65559	2.90813	NaN	23238.1
A Peak Centre Shift	141.354	141.363	141.816	141.235	141.368	140.955	141.288	141.408	141.466	141.405	141.366	141.405	141.76	142.871	142.211	144.201	147.524	NaN	141.801
B Peak Centre Shift	152.379	152.513	152.366	152.155	152.298	152.069	152.132	152.169	152.133	151.755	152.512	152.172	152.238	152.211	1256.94	153.207	152.453	NaN	3357.07
100K	ORD	2A+B and 3B	Lower Confidence Bands
Wavelength	700.4	702.41	704.35	706.4	708.51	710.37	712.44	714.43	716.36	718.56	720.5	722.44	724.47	726.26	728.35	730.36	735.06	740.38	745.42
Intensity A	11.8964	8.7462	6.92071	7.77152	7.23162	6.86219	5.61997	5.05732	4.40588	3.23463	2.92993	2.44383	2.56415	1.60962	-0.304069	1.18779	-0.209096	NaN	0.0693542
Intensity B	9.98857	7.84705	5.7426	7.61682	6.38777	5.71524	4.4853	3.50228	1.58449	0.970995	0.10172	0.527329	0.612627	0.652839	-1.47829e+06	0.049977	-442.021	NaN	-220892
Background 1	-23.811	-9.72427	-6.77219	-1.68788	-4.88699	-4.87859	-3.43329	-2.59386	-9.05258	-6.34463	-8.8145	-4.20075	-4.70956	-2.30796	-5.26755	-3.24578	-4.66571	NaN	-3.061
Background 2	0.136861	0.0584821	-0.00788579	0.0158343	0.0363543	0.0380532	0.0194247	0.0192059	0.0447954	0.0347753	0.0651439	0.0309741	0.0323234	0.00912334	0.0394261	0.0139762	-0.0455872	NaN	0.00492397
A Peak Width	5.05229	4.58329	2.15875	3.29455	4.37787	4.3285	4.68467	3.94421	3.48848	3.77874	3.76899	6.16233	6.31344	6.29748	-0.479171	6.33709	1.86099	NaN	-0.0806276
B Peak Width	1.09396	0.980936	0.517792	-1.14356	0.808267	0.841405	0.821689	0.595574	0.131823	0.0765617	-0.170883	0.130072	0.164663	0.22412	-18639.7	-0.373149	-2.83525	NaN	-23237.5
A Peak Centre Shift	140.975	141.016	140.577	141.004	140.984	140.536	140.823	140.835	139.994	140.037	140.079	140.549	140.81	141.406	140.971	142.015	141.795	NaN	141.244
B Peak Centre Shift	152.204	152.352	151.702	152.037	152.129	151.88	151.922	151.884	151.37	151.084	151.698	151.693	151.729	151.683	-951.958	152.059	151.493	NaN	-3052.07
100K	VBG	2A+B and 3B	PeakData
Wavelength	690.5	692.25	694.2	696.25	698.32	700.29	702.21	704.21	706.32	708.32	710.33	712.39	714.3	716.25
Intensity A	3.78235	3.65682	4.31579	5.53372	5.32273	6.69712	5.61926	5.51901	5.42308	5.08373	2.93227	3.42657	2.68243	2.32211
Intensity B	4.75364	4.46882	5.27076	6.33643	5.82606	7.0137	5.72925	5.98476	5.44349	4.84897	1.94243	2.23156	1.65521	1.50988
Background 1	-1.60146	-1.67608	-0.64157	-1.04059	-1.14661	-0.416074	-0.561685	2.70032	0.16457	-0.255171	-6.32122	-0.636851	0.424678	-0.153637
Background 2	0.0190067	0.0186245	0.0139665	0.0191121	0.0192643	0.0186709	0.0169976	-0.000351629	0.0135705	0.0165701	0.066022	0.0163684	0.00402637	0.0109927
A Peak Width	4.42407	4.42709	4.22187	4.30813	4.3258	4.17409	4.18662	3.55328	4.06163	4.5262	2.55572	4.84766	6.67506	4.81051
B Peak Width	0.857358	0.839927	0.877408	0.962645	1.02025	-1.07713	0.999182	1.00787	0.973782	0.941534	0.349053	1.13041	0.329048	0.95471
A Peak Centre Shift	142.759	142.03	142.451	142.221	142.027	141.964	141.883	141.622	141.117	140.679	140.451	140.745	144.094	140.979
B Peak Centre Shift	152.108	151.844	152.352	152.239	152.524	152.561	152.656	152.465	152.016	151.759	151.654	151.911	151.931	151.973
100K	VBG	2A+B and 3B	Upper Confidence Bands
Wavelength	690.5	692.25	694.2	696.25	698.32	700.29	702.21	704.21	706.32	708.32	710.33	712.39	714.3	716.25
Intensity A	3.94845	3.81301	4.4788	5.7165	5.51699	6.90303	5.80384	6.80222	5.64217	5.28328	10.2938	3.58053	3.22114	2.46927
Intensity B	5.11688	4.81047	5.61953	6.71041	6.21295	7.40973	6.09805	8.34894	5.881	5.27411	21.0623	2.53936	3.83607	1.82754
Background 1	-1.16384	-1.23755	-0.271002	-0.600039	-0.657831	0.0305934	-0.149508	5.3794	0.624461	0.202455	6.24154	-0.247405	1.84812	0.201313
Background 2	0.0216364	0.0212384	0.0163029	0.0218599	0.0222902	0.0216153	0.0196909	0.0171603	0.0167474	0.0196743	0.151752	0.0189567	0.0148874	0.0135553
A Peak Width	4.82355	4.81549	4.52905	4.58725	4.63639	4.41512	4.4447	5.03177	4.3611	4.86365	13.1216	5.28021	9.70449	5.39956
B Peak Width	0.9601	0.939345	0.967275	1.05146	1.12579	-0.981741	1.099	1.61821	1.09543	1.07001	5.28854	1.37921	0.999722	1.27392
A Peak Centre Shift	142.958	142.22	142.614	142.366	142.187	142.094	142.022	142.454	141.283	140.859	146.874	140.969	145.514	141.288
B Peak Centre Shift	152.174	151.908	152.41	152.296	152.592	152.622	152.721	152.864	152.095	151.842	155.384	152.068	152.388	152.175
100K	VBG	2A+B and 3B	Lower Confidence Bands
Wavelength	690.5	692.25	694.2	696.25	698.32	700.29	702.21	704.21	706.32	708.32	710.33	712.39	714.3	716.25
Intensity A	3.61625	3.50064	4.15278	5.35094	5.12846	6.49121	5.43468	4.2358	5.20398	4.88418	-4.42928	3.2726	2.14371	2.17494
Intensity B	4.3904	4.12718	4.92198	5.96246	5.43917	6.61767	5.36044	3.62058	5.00598	4.42383	-17.1774	1.92376	-0.525641	1.19223
Background 1	-2.03909	-2.11462	-1.01214	-1.48115	-1.63539	-0.862741	-0.973862	0.0212334	-0.295321	-0.712798	-18.884	-1.0263	-0.998765	-0.508586
Background 2	0.0163771	0.0160106	0.0116301	0.0163643	0.0162385	0.0157266	0.0143043	-0.0178636	0.0103936	0.0134659	-0.0197079	0.0137801	-0.00683463	0.00843015
A Peak Width	4.02458	4.03869	3.91469	4.029	4.01521	3.93307	3.92853	2.0748	3.76215	4.18876	-8.01017	4.4151	3.64564	4.22146
B Peak Width	0.754616	0.740509	0.787542	0.873828	0.914702	-1.17251	0.899365	0.397539	0.852134	0.813063	-4.59044	0.881602	-0.341627	0.635502
A Peak Centre Shift	142.56	141.839	142.289	142.076	141.866	141.833	141.743	140.791	140.951	140.498	134.029	140.522	142.674	140.67
B Peak Centre Shift	152.042	151.78	152.293	152.182	152.456	152.5	152.592	152.065	151.938	151.676	147.925	151.754	151.474	151.771

## Sheet: 150K
Temperature	Filter	Mode	Data Type
150K	ORD	A and B	PeakData
Wavelength	700.36	702.38	704.4	706.32	708.37	710.14	712.28	714.45	716.37	718.56	720.3	722.25	724.24	726.24	728.31	730.35	735.25	740.38	745.42
Intensity A	6.15104	6.45188	7.00923	7.77797	7.2838	7.83933	8.38886	10.6726	10.5685	10.5804	11.1055	9.69545	9.43555	9.52857	9.07197	9.5733	5.98421	5.95461	3.4725
Intensity B	56.7341	51.1366	52.6418	53.0199	46.7488	42.8835	47.4001	46.7596	42.8041	36.2901	33.1345	26.5252	20.1913	17.8125	14.823	13.4209	5.55793	2.89454	0.699225
Background 1	2.84664	-0.240497	2.72515	2.935	2.50184	2.26798	1.83562	3.23413	2.55488	2.70411	2.82958	2.05165	2.13664	1.90387	-1.18423	2.90675	3.6413	1.07691	0.675574
Background 2	-0.0112606	0.0541846	-0.00989823	-0.0130821	-0.00827168	-0.00631525	0.00917096	-0.0155255	-0.00731407	-0.0121647	-0.0146292	-0.00777312	-0.011848	-0.00900931	0.0742949	-0.0111662	-0.0448132	-0.00678687	-0.00531197
A Peak Width	0.881922	0.74292	0.88212	0.851753	0.880862	0.831103	0.81608	0.798236	0.818861	0.811912	0.830872	0.836377	0.810872	0.76617	0.759928	0.80815	0.666177	0.760041	0.746384
B Peak Width	0.614974	0.570034	0.585173	0.58098	0.632679	0.635676	0.567441	0.647732	0.603675	0.587062	0.594204	0.569649	0.603875	0.570847	0.505163	0.559112	0.450334	0.52564	0.539001
A Peak Centre Shift	46.1871	46.0564	46.2157	45.5921	45.2013	45.4982	45.2988	45.1843	45.2946	45.155	45.3467	45.4442	45.5669	45.7849	45.9146	45.8783	45.2824	45.5592	45.5913
B Peak Centre Shift	51.2784	51.2194	51.3123	50.6806	50.3783	50.5841	50.4294	50.2905	50.4362	50.2861	50.4752	50.6084	50.7412	50.9414	51.015	51.0294	50.4222	50.7533	50.6486
150K	ORD	A and B	Upper Confidence Bands
Wavelength	700.36	702.38	704.4	706.32	708.37	710.14	712.28	714.45	716.37	718.56	720.3	722.25	724.24	726.24	728.31	730.35	735.25	740.38	745.42
Intensity A	6.96638	9.6217	7.723	8.40715	7.94532	8.51215	10.7679	11.4106	11.1892	11.1098	11.5342	10.0862	9.78561	9.89607	12.5115	9.94992	8.10263	6.24592	3.72877
Intensity B	57.7063	54.76	53.5134	53.7823	47.5281	43.6505	50.2554	47.5768	43.5256	36.9116	33.6403	26.9968	20.5954	18.2368	19.031	13.8726	8.14011	3.24397	1.0004
Background 1	3.3905	1.4509	3.16939	3.35068	2.8947	2.67423	3.36593	3.74326	2.92839	3.0444	3.12447	2.28647	2.35477	2.1037	0.762358	3.13821	5.0013	1.268	0.835374
Background 2	-0.00216556	0.085189	-0.00204775	-0.00597002	-0.000940397	0.00107523	0.0360823	-0.00686636	-0.000332611	-0.00602737	-0.00944809	-0.00321126	-0.0077405	-0.00479499	0.113851	-0.00662676	-0.0200764	-0.0031258	-0.00204788
A Peak Width	1.06555	1.2961	1.02135	0.959538	1.00422	0.941064	1.1753	0.884896	0.89269	0.874769	0.880975	0.887967	0.857038	0.810818	1.19551	0.856671	1.02724	0.816955	0.830039
B Peak Width	0.630696	0.629915	0.599565	0.593435	0.648444	0.652659	0.618311	0.664717	0.618838	0.60204	0.607742	0.584719	0.621912	0.591222	0.718319	0.58715	0.758386	0.619772	0.886313
A Peak Centre Shift	46.3039	46.4213	46.3055	45.661	45.2813	45.5695	45.5301	45.2394	45.3427	45.1956	45.3788	45.4779	45.5969	45.8144	46.2023	45.9101	45.5183	45.5964	45.6464
B Peak Centre Shift	51.289	51.2595	51.322	50.6889	50.3888	50.5955	50.4633	50.3018	50.4464	50.2961	50.4842	50.6185	50.7533	50.955	51.1583	51.0482	50.6304	50.8168	50.8805
150K	ORD	A and B	Lower Confidence Bands
Wavelength	700.36	702.38	704.4	706.32	708.37	710.14	712.28	714.45	716.37	718.56	720.3	722.25	724.24	726.24	728.31	730.35	735.25	740.38	745.42
Intensity A	5.33571	3.28206	6.29547	7.1488	6.62229	7.1665	6.00982	9.93452	9.94777	10.0511	10.6769	9.30469	9.08548	9.16107	5.63244	9.19667	3.86579	5.6633	3.21622
Intensity B	55.7619	47.5131	51.7702	52.2576	45.9694	42.1165	44.5448	45.9425	42.0827	35.6685	32.6287	26.0537	19.7871	17.3881	10.615	12.9693	2.97575	2.54512	0.39805
Background 1	2.30279	-1.9319	2.28092	2.51932	2.10898	1.86173	0.305306	2.725	2.18136	2.36382	2.53469	1.81682	1.9185	1.70404	-3.13081	2.6753	2.28131	0.885816	0.515774
Background 2	-0.0203557	0.0231802	-0.0177487	-0.0201942	-0.015603	-0.0137057	-0.0177404	-0.0241847	-0.0142955	-0.018302	-0.0198103	-0.012335	-0.0159555	-0.0132236	0.0347384	-0.0157056	-0.06955	-0.0104479	-0.00857606
A Peak Width	0.698294	0.189738	0.742894	0.743968	0.757508	0.721143	0.456856	0.711576	0.745032	0.749055	0.78077	0.784786	0.764706	0.721522	0.324345	0.759629	0.305115	0.703128	0.662729
B Peak Width	0.599252	0.510152	0.570781	0.568525	0.616914	0.618694	0.51657	0.630747	0.588511	0.572085	0.580667	0.554578	0.585838	0.550472	0.292007	0.531073	0.142283	0.431509	0.191688
A Peak Centre Shift	46.0702	45.6914	46.1259	45.5232	45.1214	45.4269	45.0676	45.1291	45.2466	45.1144	45.3146	45.4105	45.5368	45.7554	45.6269	45.8465	45.0465	45.522	45.5363
B Peak Centre Shift	51.2679	51.1792	51.3025	50.6723	50.3677	50.5727	50.3954	50.2791	50.426	50.276	50.4661	50.5982	50.729	50.9277	50.8716	51.0106	50.2141	50.6897	50.4168
150K	VBG	A and B	PeakData
Wavelength	692.44	694.2	696.44	698.33	700.32	702.26	704.1	706.35	708.32	710.31	712.3	714.3	716.33	716.25
Intensity A	2.70264	2.02158	1.6825	3.56942	3.68628	4.51935	4.5359	6.40836	6.11325	7.62516	6.9519	4.82595	11.0645	12.5485
Intensity B	28.9896	24.4437	23.661	36.1139	34.0017	34.1193	38.0595	43.0034	37.7871	44.1217	35.8151	22.6547	44.6476	32.8775
Background 1	1.16258	0.372224	1.84417	1.46829	1.39406	1.60551	-5.777	1.8034	1.73621	2.11324	1.6604	3.40099	2.39995	1.38458
Background 2	-0.00334732	0.0307626	-0.0156417	-0.00433685	-0.00264516	-0.00294003	0.177158	-0.000442708	-0.0033794	-0.00531188	-0.000973579	-0.0416687	-0.0035711	-0.00344492
A Peak Width	0.931471	0.42362	0.882823	0.995188	0.898337	0.995478	0.584556	0.864548	0.842951	0.900442	0.865141	0.604198	0.830073	0.720309
B Peak Width	0.598287	0.59792	0.588327	0.601959	0.617214	0.779805	0.5086	0.631866	0.637479	0.595036	0.602024	0.559705	0.593423	0.539562
A Peak Centre Shift	45.6118	45.6133	45.9178	46.0046	46.2458	45.9758	45.9335	45.4503	45.287	45.2437	45.4627	45.2916	45.3052	45.7485
B Peak Centre Shift	50.6181	50.6552	51.0218	51.1553	51.2537	51.0929	51.0584	50.5931	50.4234	50.3927	50.5573	50.3746	50.4589	50.9184
150K	VBG	A and B	Upper Confidence Bands
Wavelength	692.44	694.2	696.44	698.33	700.32	702.26	704.1	706.35	708.32	710.31	712.3	714.3	716.33	716.25
Intensity A	3.17483	11.299	2.4397	3.32226	4.01951	4.12881	5.11256	3.30453	23.1869	6.93695	6.72569	8.17152	7.37469	8.66184	11.7198
Intensity B	29.5786	32.5577	22.635	25.666	36.6923	34.5338	34.7878	25.6998	57.8926	43.6213	38.4909	44.7905	36.3203	26.6455	45.421
Background 1	1.42011	3.48664	1.17899	2.66645	1.72282	1.60711	1.92268	1.22328	2.1238	2.05674	2.04108	2.41063	1.86399	5.01315	2.74103
Background 2	0.00112108	0.0908514	2.73975e-05	-0.000531798	0.000182844	0.00152887	0.00305346	0.00293094	0.323434	0.00464305	0.00252723	0.000247852	0.00325608	-0.00921965	0.00302721
A Peak Width	1.18365	3.22261	1.55591	2.19602	1.19015	1.06266	1.1986	1.21006	4.15337	0.972835	0.971355	0.999471	0.944961	1.31593	0.904781
B Peak Width	0.616412	0.890337	0.633799	0.662304	0.616327	0.631629	0.803076	0.64346	0.89618	0.645448	0.655204	0.608441	0.61472	0.705702	0.608725
A Peak Centre Shift	45.7746	47.7167	46.2593	46.7777	46.1302	46.3537	46.1067	46.2855	48.3334	45.5216	45.3715	45.3082	45.5153	45.7729	45.3543
B Peak Centre Shift	50.6302	50.8539	51.0095	51.0716	51.1649	51.2634	51.1082	51.2557	51.3269	50.6021	50.4352	50.4017	50.5658	50.473	50.4692
150K	VBG	A and B	Lower Confidence Bands
Wavelength	692.44	694.2	696.44	698.33	700.32	702.26	704.1	706.35	708.32	710.31	712.3	714.3	716.33	716.25
Intensity A	2.23046	-7.2558	1.7466	0.042741	3.11933	3.24375	3.92615	2.56425	-14.1151	5.87978	5.50081	7.0788	6.5291	0.990067	10.4093
Intensity B	28.4006	16.3297	21.6593	21.656	35.5356	33.4696	33.4509	24.7606	18.2264	42.3854	37.0834	43.4529	35.3099	18.6638	43.8741
Background 1	0.905047	-2.74219	0.765799	1.02189	1.21376	1.181	1.28834	0.82354	-13.6778	1.55006	1.43135	1.81584	1.45682	1.78883	2.05888
Background 2	-0.00781572	-0.0293261	-0.00752289	-0.0307515	-0.00885654	-0.00681918	-0.00893352	-0.00461137	0.0308813	-0.00552846	-0.00928604	-0.0108716	-0.00520324	-0.0741178	-0.0101694
A Peak Width	0.679293	-2.37537	0.905571	-0.430375	0.800228	0.734012	0.79236	0.814768	-2.98426	0.756261	0.714548	0.801414	0.785321	-0.107532	0.755366
B Peak Width	0.580162	0.305503	0.593	0.51435	0.587592	0.602799	0.756535	0.608563	0.12102	0.618284	0.619753	0.581631	0.589329	0.413708	0.578121
A Peak Centre Shift	45.449	43.5099	45.8501	45.0579	45.879	46.138	45.8448	46.0298	43.5336	45.3789	45.2025	45.1792	45.4101	44.8104	45.2561
B Peak Centre Shift	50.606	50.4566	50.9823	50.972	51.1457	51.244	51.0776	51.2324	50.7899	50.584	50.4115	50.3836	50.5487	50.2762	50.4486
150K	ORD	2A and 2B	Peakdata
Wavelength	700.36	702.38	704.4	706.32	708.37	710.14	712.28	714.45	716.37	718.56	720.3	722.25	724.24	726.24	728.31	730.35	735.25	740.38	745.42
Intensity A	2.36167	2.14448	2.35647	2.32653	2.36296	2.27898	2.3755	2.9823	2.7486	2.6988	2.57181	2.06045	1.91853	1.90569	2.05513	1.78648	1.05066	0.91411	0.436514
Intensity B	14.3622	12.0649	12.5065	12.9419	11.2256	10.4555	10.6023	10.7888	9.27682	7.72448	6.97741	4.70311	3.93853	3.42964	2.89806	2.22897	0.92933	0.541568	0.283191
Background 1	-0.231337	0.807288	0.847029	0.830646	1.25566	1.27064	1.17057	1.68059	1.51678	1.45948	1.34596	1.26515	1.20348	0.943491	1.77546	1.99216	0.753005	0.47657	0.315588
Background 2	0.0229104	0.0104525	0.0123863	0.0129691	0.00808816	0.00639063	0.00843592	0.00681681	0.00607273	0.00521006	0.00569206	0.00246866	0.00237219	0.00363487	-0.00304019	0.00163854	0.000797949	0.0019827	-1.98731e-05
A Peak Width	5.53417	4.24429	3.94123	4.01139	3.72238	3.36861	3.62833	2.85384	2.9261	2.43442	2.7066	2.52784	2.35573	2.04842	1.5193	2.04754	2.17647	1.66518	2.37894
B Peak Width	0.894901	0.954705	0.970639	0.89244	0.981137	0.941973	0.951068	1.0166	0.974829	1.04165	1.01028	1.09038	0.987536	0.982141	1.05821	1.16916	1.45424	1.06006	1.0081
A Peak Centre Shift	91.6908	91.5521	91.4488	90.7573	90.4746	90.6589	90.5111	90.3118	90.3184	90.1233	90.3324	90.6787	90.4079	91.0854	91.2585	91.1054	90.0967	90.7971	91.2407
B Peak Centre Shift	101.587	101.493	101.573	100.955	100.673	100.87	100.751	100.587	100.785	100.554	100.782	100.889	101.038	101.177	101.325	101.28	100.551	100.877	102.675
150K	ORD	2A and 2B	Upper Confidence Bands
Wavelength	700.36	702.38	704.4	706.32	708.37	710.14	712.28	714.45	716.37	718.56	720.3	722.25	724.24	726.24	728.31	730.35	735.25	740.38	745.42
Intensity A	2.63315	2.32825	2.55613	2.55206	2.55167	2.45897	2.56856	3.20343	2.96102	2.91047	2.79369	2.24715	2.11483	2.10691	2.70638	1.98648	1.21891	1.10214	0.579767
Intensity B	14.9214	12.4211	12.8918	13.3886	11.5825	10.7874	10.9656	11.1502	9.63904	8.04417	7.33452	4.98451	4.23889	3.71836	3.67585	2.49197	1.13369	0.776226	0.500863
Background 1	0.559086	1.14644	1.23323	1.31635	1.57626	1.56701	1.53134	2.05003	1.82262	1.74509	1.67984	1.49926	1.44974	1.15833	2.38666	2.21797	0.968716	0.676811	0.503498
Background 2	0.0292039	0.0133827	0.0157042	0.0170579	0.0109765	0.00905477	0.0116079	0.0100804	0.00895021	0.00788391	0.00877355	0.00480231	0.00479206	0.00594427	0.00348346	0.00399774	0.0029506	0.00412115	0.00214628
A Peak Width	6.9866	4.95241	4.60259	4.79495	4.28716	3.86093	4.19578	3.23941	3.32282	2.7603	3.11768	2.9122	2.75688	2.39479	2.26646	2.4173	2.75572	2.20485	3.66861
B Peak Width	0.950935	0.998644	1.01674	0.939562	1.02907	0.987406	1.00085	1.06823	1.03246	1.10684	1.08854	1.19033	1.1015	1.10891	1.49445	1.38291	1.95703	1.7696	2.25153
A Peak Centre Shift	92.2827	91.9191	91.7835	91.1382	90.774	90.9254	90.8055	90.5223	90.5447	90.314	90.5653	90.9081	90.6488	91.3014	91.7395	91.3345	90.4457	91.1392	92.018
B Peak Centre Shift	101.622	101.521	101.603	100.986	100.704	100.9	100.784	100.621	100.823	100.597	100.833	100.955	101.113	101.26	101.609	101.418	100.871	101.336	103.45
150K	ORD	2A and 2B	Lower Confidence Bands
Wavelength	700.36	702.38	704.4	706.32	708.37	710.14	712.28	714.45	716.37	718.56	720.3	722.25	724.24	726.24	728.31	730.35	735.25	740.38	745.42
Intensity A	2.09019	1.96071	2.15681	2.10101	2.17424	2.099	2.18243	2.76118	2.53619	2.48712	2.34992	1.87374	1.72224	1.70446	1.40388	1.58648	0.882407	0.726081	0.293261
Intensity B	13.8031	11.7086	12.1212	12.4952	10.8687	10.1237	10.239	10.4274	8.91461	7.40479	6.6203	4.42171	3.63816	3.14092	2.12028	1.96596	0.724971	0.30691	0.0655189
Background 1	-1.02176	0.468139	0.460832	0.344945	0.935068	0.974276	0.809789	1.31114	1.21093	1.17387	1.01207	1.03105	0.957219	0.728648	1.16427	1.76635	0.537293	0.276329	0.127679
Background 2	0.0166168	0.00752225	0.00906834	0.00888038	0.00519981	0.0037265	0.00526394	0.00355326	0.00319524	0.00253622	0.00261057	0.000135008	-4.76818e-05	0.00132547	-0.00956383	-0.000720662	-0.0013547	-0.000155753	-0.00218603
A Peak Width	4.08174	3.53617	3.27986	3.22784	3.15759	2.87628	3.06089	2.46826	2.52938	2.10854	2.29552	2.14349	1.95459	1.70206	0.772137	1.67778	1.59721	1.12551	1.08927
B Peak Width	0.838868	0.910765	0.924539	0.845317	0.933201	0.896539	0.901284	0.964975	0.917199	0.976457	0.932033	0.990437	0.873568	0.855376	0.621963	0.955409	0.951447	0.350519	-0.235337
A Peak Centre Shift	91.0989	91.1851	91.1142	90.3764	90.1751	90.3923	90.2166	90.1012	90.0921	89.9326	90.0994	90.4493	90.167	90.8693	90.7776	90.8762	89.7477	90.4549	90.4634
B Peak Centre Shift	101.552	101.465	101.542	100.924	100.641	100.84	100.718	100.553	100.747	100.511	100.73	100.824	100.963	101.095	101.041	101.142	100.231	100.417	101.901
150K	VBG	2A and 2B	PeakData
Wavelength	692.44	694.2	696.44	698.33	700.32	702.26	704.1	706.35	708.32	710.31	712.3	714.3	716.33	716.25
Intensity A	2.92415	0.878116	0.883425	-1.94477	1.38083	1.46327	1.74064	1.03573	1.55427	2.25618	1.89247	2.20399	2.07445	1.43478	3.18638
Intensity B	7.49294	6.7331	6.00964	5.69312	9.54766	8.64773	9.18517	6.4479	9.12836	10.8291	9.21527	10.0358	8.07883	4.81231	9.4307
Background 1	-5.95097	0.0419653	-0.317761	3.63656	-0.345604	0.537005	0.706265	0.150828	0.410282	1.01024	0.794885	1.27965	1.03296	0.796932	1.44857
Background 2	0.0530198	0.00879045	0.0102732	-0.00930628	0.0151963	0.00712238	0.0082765	0.00793853	0.00970846	0.00793104	0.00784745	0.00562043	0.00573343	0.00220558	0.00682517
A Peak Width	20.0115	6.14036	7.76972	13.7174	6.39767	3.71754	4.13306	5.68647	5.2776	2.97596	3.80979	3.28073	2.87508	2.38042	2.46583
B Peak Width	0.864415	0.865914	0.801183	0.655252	0.910406	0.97397	1.12015	0.946933	0.884717	0.913051	0.926076	0.984298	0.966351	0.936784	0.968901
A Peak Centre Shift	87	92.5523	92.8976	87.0001	91.7708	92.1	91.7125	92.3907	92.0872	90.9211	90.9402	90.5375	90.6317	90.4428	90.5113
B Peak Centre Shift	100.884	100.938	101.267	101.277	101.398	101.544	101.382	101.48	101.348	100.891	100.704	100.71	100.833	100.706	100.713
150K	VBG	2A and 2B	Upper Confidence Bands
Wavelength	692.44	694.2	696.44	698.33	700.32	702.26	704.1	706.35	708.32	710.31	712.3	714.3	716.33	716.25
Intensity A	3.64243	1.01194	1.02771	15.2889	1.57057	1.62861	1.91719	1.16956	1.70959	2.44154	2.07624	2.40234	2.27802	1.62838	3.40694
Intensity B	7.87906	7.0534	6.33077	14.7607	9.94331	8.96288	9.51213	6.75131	9.47819	11.1585	9.57751	10.389	8.42534	5.11802	9.77872
Background 1	-4.31774	0.380833	0.109939	51.035	0.231903	0.801604	1.03458	0.474343	0.78444	1.26217	1.1073	1.60273	1.29605	1.02995	1.73112
Background 2	0.0637791	0.0115113	0.0135182	0.328808	0.0197254	0.00948359	0.0111293	0.0106127	0.0128161	0.0102861	0.0106648	0.00852599	0.00829675	0.00446218	0.00951737
A Peak Width	23.4051	8.47957	10.792	137.419	8.5086	4.51959	4.98398	7.54606	6.48565	3.40405	4.52013	3.82479	3.35948	2.91492	2.75412
B Peak Width	0.939922	0.937204	0.87749	2.36835	0.973682	1.0291	1.18348	1.02202	0.939827	0.955016	0.982209	1.03707	1.02927	1.02626	1.0228
A Peak Centre Shift	NaN	93.5636	94.0761	121.756	92.5845	92.5276	92.1424	93.1904	92.6296	91.1663	91.3147	90.8333	90.9145	90.7639	90.682
B Peak Centre Shift	100.929	100.979	101.31	102.318	101.435	101.58	101.422	101.524	101.382	100.919	100.74	100.745	100.874	100.766	100.749
150K	VBG	2A and 2B	Lower Confidence Bands
Wavelength	692.44	694.2	696.44	698.33	700.32	702.26	704.1	706.35	708.32	710.31	712.3	714.3	716.33	716.25
Intensity A	2.20588	0.744296	0.739144	-19.1785	1.19109	1.29793	1.56409	0.901902	1.39896	2.07081	1.70869	2.00565	1.87089	1.24119	2.96581
Intensity B	7.10682	6.41281	5.6885	-3.37444	9.152	8.33258	8.85822	6.14449	8.77854	10.4997	8.85304	9.68249	7.73231	4.5066	9.08268
Background 1	-7.58421	-0.296902	-0.745462	-43.7618	-0.923111	0.272405	0.377954	-0.172688	0.036125	0.758308	0.482471	0.956562	0.769858	0.563914	1.16601
Background 2	0.0422605	0.00606963	0.00702822	-0.347421	0.0106673	0.00476117	0.00542366	0.00526432	0.00660084	0.005576	0.00503008	0.00271488	0.00317011	-5.10169e-05	0.00413298
A Peak Width	16.6179	3.80115	4.74741	-109.984	4.28674	2.91548	3.28215	3.82688	4.06954	2.54787	3.09944	2.73667	2.39068	1.84592	2.17754
B Peak Width	0.788909	0.794624	0.724876	-1.05784	0.84713	0.918843	1.05681	0.871849	0.829608	0.871085	0.869943	0.931526	0.903436	0.847313	0.915001
A Peak Centre Shift	NaN	91.5409	91.719	52.2444	90.957	91.6724	91.2826	91.5911	91.5448	90.6759	90.5656	90.2417	90.3488	90.1216	90.3407
B Peak Centre Shift	100.84	100.897	101.225	100.235	101.36	101.509	101.341	101.435	101.314	100.863	100.667	100.675	100.791	100.647	100.677
150K	ORD	3B	PeakData
Wavelength	700.36	702.38	704.4	706.32	708.37	710.14	712.28	714.45	716.37	718.56	720.3	722.25	724.24	726.24	728.31	730.35	735.25	740.38	745.42
Intensity B	3.18032	2.91536	3.20695	3.5625	2.46198	2.4996	3.17652	2.15227	2.13412	1.54047	1.47494	0.758507	0.666975	0.450996	0.670416	77.9883	0.217798	0.0229516	1.42635
Background 1	6.42281	2.523	4.05643	4.4261	2.58687	1.76218	2.31859	2.12164	0.9253	-0.819975	-2.52004	-0.343373	-1.00438	1.69051	-1.25374	-0.606191	-2.06983	-1.86936	-1.65703
Background 2	-0.0157408	0.00373799	-0.00391694	-0.00611055	0.00399586	0.00780557	0.00560551	0.0111427	0.0164623	0.0269673	0.0382719	0.0197235	0.0231496	0.00311403	0.0255982	0.0254685	0.0250126	0.0211498	0.016879
B Peak Width	0.402277	1.04841	0.902155	0.733959	1.35699	1.04973	0.83018	1.03125	0.78702	0.610074	0.506673	0.40456	0.28492	2.52133	0.189554	0.00828973	0.0294595	0.00786944	0.301561
B Peak Centre Shift	152.418	151.621	151.796	151.148	150.781	150.968	150.784	150.614	150.848	150.689	151.018	151.057	151.003	150.732	151.118	151.191	150.87	150.516	152.5
150K	ORD	3B	Upper Confidence Bands
Wavelength	700.36	702.38	704.4	706.32	708.37	710.14	712.28	714.45	716.37	718.56	720.3	722.25	724.24	726.24	728.31	730.35	735.25	740.38	745.42
Intensity B	4.43196	3.45083	3.77172	4.29696	3.05585	3.10022	3.9336	2.82908	3.06944	2.56941	2.59965	1.80688	1.97433	0.69075	2.82586	293801	8.81182	182147	220895
Background 1	8.13381	3.69157	5.21749	5.80801	4.04857	3.07869	3.4563	3.66336	2.6851	0.918156	-0.760667	1.0829	0.421271	3.28168	-0.233997	0.327323	-1.36397	-1.25769	-0.25307
Background 2	-0.00529011	0.0110194	0.0033072	0.00247848	0.0133418	0.0162187	0.0129078	0.0209147	0.0280951	0.0384107	0.04983	0.0294457	0.0328248	0.0145962	0.032745	0.0319834	0.0298945	0.0255188	0.028834
B Peak Width	0.66963	1.34902	1.14762	0.965072	1.8819	1.44455	1.09569	1.53891	1.31525	1.22305	1.0813	1.23907	1.10947	5.05101	0.984547	15.6825	2.07132	31354.2	23238.1
B Peak Centre Shift	152.599	151.813	151.955	151.299	151.108	151.22	151.036	150.937	151.192	151.097	151.408	151.605	151.528	151.714	151.365	151.318	167.552	829.75	3357.07
150K	ORD	3B	Lower Confidence Bands
Wavelength	700.36	702.38	704.4	706.32	708.37	710.14	712.28	714.45	716.37	718.56	720.3	722.25	724.24	726.24	728.31	730.35	735.25	740.38	745.42
Intensity B	1.92869	2.37989	2.64218	2.82805	1.8681	1.89898	2.41945	1.47547	1.19879	0.51154	0.350231	-0.28987	-0.640383	0.211242	-1.48503	-293645	-8.37623	-182147	-220892
Background 1	4.71181	1.35444	2.89538	3.0442	1.12518	0.445675	1.18089	0.579921	-0.834504	-2.55811	-4.27941	-1.76964	-2.43004	0.0993359	-2.27348	-1.5397	-2.77569	-2.48104	-3.061
Background 2	-0.0261916	-0.00354342	-0.0111411	-0.0146996	-0.00535007	-0.000607582	-0.00169682	0.00137069	0.00482953	0.0155238	0.0267137	0.0100013	0.0134744	-0.0083681	0.0184515	0.0189535	0.0201307	0.0167807	0.00492397
B Peak Width	0.134925	0.7478	0.656686	0.502845	0.832076	0.654904	0.56467	0.523585	0.258785	-0.00290577	-0.0679588	-0.429947	-0.539628	-0.00834703	-0.60544	-15.6659	-2.0124	-31354.2	-23237.5
B Peak Centre Shift	152.237	151.429	151.638	150.998	150.454	150.716	150.531	150.29	150.503	150.281	150.629	150.508	150.478	149.749	150.871	151.064	134.188	-528.719	-3052.07
150K	VBG	2A+B and 3B	PeakData
Wavelength	692.44	694.2	696.44	698.33	700.32	702.26	704.1	706.35	708.32	710.31	712.3	714.3	716.33	716.25
Intensity A	1.78488	1.58257	1.55211	1.47008	2.11914	2.19862	2.63826	1.7277	2.26573	2.50317	2.26269	2.67036	2.08096	1.32238	2.46054
Intensity B	2.13411	1.82114	1.87214	1.63578	2.17398	2.26325	2.43197	1.84569	2.59912	2.64697	2.04163	2.18356	2.02826	1.00198	1.66221
Background 1	-1.7557	-0.922573	-0.81827	-0.61112	-2.86448	-0.780689	-0.531951	-0.393958	-0.468585	0.0670176	-0.232664	-0.532395	0.387515	0.00503322	-0.547677
Background 2	0.0202699	0.0145807	0.0123279	0.0112755	0.0332819	0.0156533	0.0161536	0.0110518	0.014851	0.0141202	0.0146713	0.0182797	0.0102233	0.00803704	0.0221702
A Peak Width	5.96013	5.51894	5.66718	5.35248	4.08736	5.71836	5.45277	5.62118	5.33976	5.06315	5.35696	5.65925	5.2602	5.08511	4.94737
B Peak Width	0.938091	1.04643	1.05149	0.837693	0.791496	1.00068	1.0987	0.955849	0.867886	0.944266	1.05504	1.0544	0.956921	1.1906	1.13354
A Peak Centre Shift	141.418	141.584	142.002	141.804	141.577	141.634	141.568	141.696	141.243	140.765	140.418	140.451	140.69	140.085	140.337
B Peak Centre Shift	151.251	151.155	151.375	151.576	151.689	151.698	151.664	151.651	151.528	151.215	151.36	151.105	151.095	151.266	150.855
150K	VBG	2A+B and 3B	Upper Confidence Bands
Wavelength	692.44	694.2	696.44	698.33	700.32	702.26	704.1	706.35	708.32	710.31	712.3	714.3	716.33	716.25
Intensity A	1.94336	1.73083	1.68741	1.61087	4.0943	2.33789	2.79746	1.86331	2.42113	2.67048	2.41983	2.84698	2.23125	1.44949	2.65776
Intensity B	2.48329	2.14666	2.17084	1.9743	6.52925	2.58321	2.77358	2.16136	2.9682	3.0222	2.38227	2.5751	2.36658	1.25434	2.05977
Background 1	-1.16848	-0.500324	-0.414552	-0.206679	1.97537	-0.408275	-0.104966	-0.0244326	-0.0419738	0.465808	0.168395	-0.0524234	0.747293	0.314502	-0.0677836
Background 2	0.0236532	0.0171575	0.01477	0.0137371	0.063277	0.0180306	0.01887	0.0133949	0.0175412	0.0168267	0.0173517	0.0214371	0.0128306	0.0102571	0.0255774
A Peak Width	7.2128	6.6932	6.82094	6.46929	11.4259	6.51819	6.17142	6.59164	6.11542	5.74493	6.1257	6.46693	6.03205	6.05592	5.74259
B Peak Width	1.19075	1.35694	1.33368	1.11416	3.20623	1.23234	1.3524	1.22193	1.06296	1.15684	1.33768	1.36185	1.21404	1.68075	1.57607
A Peak Centre Shift	141.946	142.142	142.541	142.337	145.422	142.022	141.919	142.166	141.623	141.116	140.804	140.845	141.083	140.586	140.748
B Peak Centre Shift	151.405	151.343	151.543	151.75	153.277	151.84	151.819	151.815	151.652	151.35	151.537	151.295	151.256	151.568	151.128
150K	VBG	2A+B and 3B	Lower Confidence Bands
Wavelength	692.44	694.2	696.44	698.33	700.32	702.26	704.1	706.35	708.32	710.31	712.3	714.3	716.33	716.25
Intensity A	1.6264	1.43432	1.4168	1.32928	0.143982	2.05935	2.47905	1.5921	2.11033	2.33585	2.10554	2.49375	1.93067	1.19527	2.26331
Intensity B	1.78493	1.49562	1.57344	1.29727	-2.1813	1.94329	2.09036	1.53003	2.23005	2.27175	1.701	1.79202	1.68993	0.749609	1.26465
Background 1	-2.34292	-1.34482	-1.22199	-1.01556	-7.70433	-1.1531	-0.958936	-0.763483	-0.895196	-0.331773	-0.633724	-1.01237	0.0277377	-0.304435	-1.02757
Background 2	0.0168865	0.0120038	0.00988574	0.00881384	0.00328693	0.0132761	0.0134372	0.00870872	0.0121608	0.0114138	0.0119908	0.0151222	0.00761604	0.00581696	0.018763
A Peak Width	4.70745	4.34469	4.51343	4.23568	-3.25117	4.91853	4.73411	4.65072	4.56409	4.38138	4.58822	4.85157	4.48834	4.11431	4.15215
B Peak Width	0.685434	0.735925	0.769297	0.561229	-1.62324	0.769017	0.845004	0.689765	0.672817	0.731688	0.772386	0.746949	0.6998	0.700457	0.691018
A Peak Centre Shift	140.891	141.027	141.464	141.27	137.731	141.246	141.216	141.226	140.863	140.415	140.032	140.057	140.296	139.583	139.926
B Peak Centre Shift	151.097	150.967	151.206	151.402	150.1	151.556	151.509	151.487	151.404	151.081	151.183	150.915	150.935	150.964	150.582

## Sheet: 225K
Temperature	Filter	Mode	Data Type
225K	ORD	A and B	PeakData
Wavelength	700.38	702.11	704.25	706.24	708.15	710.12	712.28	714.44	716.37	718.4	720.35	722.25	724.46	726.39	728.56	730.35	732.38	734.42	736.42	738.23	740.45	742.31	744.4	746.16	748.38	750.27	755.33	760.29	765.13
Intensity A	14.2891	16.3599	16.1434	21.8613	24.1758	24.3379	24.7694	33.3441	31.9268	35.2046	31.3137	30.5254	36.388	31.8623	32.1489	36.1112	40.0099	34.2086	29.494	32.0706	33.2047	28.3491	22.6421	20.0541	16.2875	19.2794	17.3722	7.65531	9.81654
Intensity B	126.541	133.812	122.378	164.509	168.088	162.969	158.824	191.107	178.245	201.784	156.318	149.292	165.269	127.477	124.058	128.885	130.378	99.5471	79.6124	75.5608	73.4697	65.8791	45.5569	35.6695	25.6337	29.6482	18.4907	7.22472	5.75591
Background 1	14.4711	16.6798	16.7282	19.9185	21.7465	20.3679	19.5228	30.5928	22.4049	24.7045	21.5795	18.7998	25.7528	19.7794	19.8476	24.1424	27.2139	23.4827	18.7049	19.4652	21.6477	19.8603	15.3041	15.0885	17.4009	15.4641	33.2476	5.75337	6.75308
Background 2	-0.0737136	-0.0871001	-0.0969317	-0.102423	-0.116703	-0.108826	-0.100417	-0.173106	-0.108108	-0.11929	-0.111642	-0.07477	-0.148873	-0.108575	-0.10737	-0.151854	-0.16555	-0.145567	-0.126603	-0.132902	-0.154252	-0.154345	-0.115744	-0.112997	-0.174362	-0.124129	-0.40286	-0.0540702	-0.0585781
A Peak Width	1.18498	1.11453	1.14705	1.09283	1.07642	1.08122	1.04807	1.07141	1.01522	1.01928	1.03171	1.05329	1.05675	1.00475	1.06309	1.09991	1.15684	1.10319	1.09621	1.04716	1.02013	1.01599	1.10701	1.27569	0.981964	0.977029	0.942215	0.997436	1.00583
B Peak Width	0.666896	0.68906	0.661867	0.680487	0.680949	0.661585	0.669009	0.696463	0.653894	0.670017	0.666582	0.648766	0.661054	0.639042	0.635345	0.648177	0.666637	0.698939	0.633412	0.652491	0.661533	0.629951	0.642529	0.798063	0.59339	0.609433	0.601162	0.627542	0.620296
A Peak Centre Shift	45.8285	45.6106	45.5738	45.0991	44.8607	44.9278	44.721	44.8054	44.75	44.8017	45.0186	44.984	45.3063	45.537	45.5191	45.358	44.8483	45.0497	44.6209	44.682	44.8709	44.9104	44.9467	44.8313	44.9899	44.8615	45.3746	45.3016	44.858
B Peak Centre Shift	50.94	50.7466	50.662	50.1642	49.9556	49.9802	49.7971	49.9107	49.8307	49.8412	50.0825	50.0864	50.4064	50.5957	50.6222	50.4444	50.0035	50.1114	49.7124	49.7656	49.9432	49.9458	50.0026	49.9223	50.0887	49.8635	50.4109	50.28	49.9332
225K	ORD	A and B	Upper Confidence Bands
Wavelength	700.38	702.11	704.25	706.24	708.15	710.12	712.28	714.44	716.37	718.4	720.35	722.25	724.46	726.39	728.56	730.35	732.38	734.42	736.42	738.23	740.45	742.31	744.4	746.16	748.38	750.27	755.33	760.29	765.13
Intensity A	15.4824	17.6782	17.334	23.4344	25.9249	25.6911	26.3014	34.9024	33.6362	37.0101	32.8168	32.8689	39.7108	33.0196	33.4786	40.7311	41.8161	35.3933	30.3758	33.0339	34.2429	29.389	23.3621	20.8019	16.9627	20.6321	18.8057	8.01833	10.16
Intensity B	128.124	135.482	123.937	166.492	170.28	164.691	160.734	193.033	180.367	203.991	158.179	152.263	169.452	128.924	125.772	134.874	132.744	101.028	80.7661	76.7758	74.7543	67.1952	46.4984	36.6092	26.4995	31.3548	20.2778	7.6807	6.18887
Background 1	15.2495	17.5609	17.6004	21.144	22.9087	21.3295	20.6871	31.629	23.5782	26.4777	22.7727	20.8434	28.1843	20.506	20.7548	27.5242	28.6832	24.4846	19.3473	20.1855	22.464	20.5738	15.8474	15.7314	17.8555	16.4056	34.2221	6.02801	7.04799
Background 2	-0.0591793	-0.0711348	-0.0817068	-0.0817171	-0.0951374	-0.0915617	-0.0802284	-0.153337	-0.0864272	-0.0910544	-0.0909258	-0.0403114	-0.103752	-0.0933868	-0.0891908	-0.0864138	-0.138285	-0.127513	-0.113698	-0.118856	-0.138873	-0.139118	-0.104612	-0.100303	-0.164055	-0.1036	-0.379488	-0.048111	-0.052754
A Peak Width	1.34272	1.25748	1.28365	1.22088	1.19994	1.17739	1.15264	1.15063	1.10112	1.1073	1.11172	1.18608	1.2102	1.06149	1.13217	1.32353	1.24145	1.16539	1.14817	1.09705	1.07097	1.07428	1.16296	1.35427	1.04527	1.08387	1.06329	1.07162	1.06239
B Peak Width	0.679527	0.702086	0.674611	0.692909	0.694384	0.672138	0.681166	0.707115	0.665619	0.681233	0.678578	0.668294	0.686351	0.65006	0.648642	0.693834	0.685007	0.714786	0.64734	0.668401	0.679055	0.649134	0.662786	0.831011	0.62408	0.662983	0.691539	0.6884	0.691217
A Peak Centre Shift	45.9278	45.7006	45.6586	45.1779	44.9387	44.9881	44.7859	44.8556	44.8045	44.8539	45.0682	45.065	45.403	45.5735	45.5631	45.4989	44.9007	45.0881	44.6537	44.7135	44.9029	44.9477	44.982	44.8793	45.0306	44.93	45.4522	45.3489	44.893
B Peak Centre Shift	50.9483	50.7552	50.6704	50.1724	49.9645	49.9873	49.8052	49.9177	49.8385	49.8485	50.0904	50.0993	50.4232	50.6029	50.6309	50.4746	50.0156	50.1218	49.7216	49.7761	49.9547	49.9584	50.0159	49.9435	50.1087	49.8986	50.469	50.3196	49.9799
225K	ORD	A and B	Lower Confidence Bands
Wavelength	700.38	702.11	704.25	706.24	708.15	710.12	712.28	714.44	716.37	718.4	720.35	722.25	724.46	726.39	728.56	730.35	732.38	734.42	736.42	738.23	740.45	742.31	744.4	746.16	748.38	750.27	755.33	760.29	765.13
Intensity A	13.0958	15.0415	14.9528	20.2882	22.4267	22.9846	23.2373	31.7858	30.2175	33.3991	29.8106	28.1819	33.0652	30.7049	30.8192	31.4912	38.2038	33.024	28.6122	31.1074	32.1665	27.3092	21.9221	19.3063	15.6124	17.9268	15.9388	7.29228	9.47309
Intensity B	124.959	132.142	120.819	162.527	165.897	161.246	156.915	189.181	176.123	199.577	154.457	146.321	161.087	126.03	122.345	122.897	128.013	98.0662	78.4588	74.3458	72.1851	64.5631	44.6155	34.7297	24.7679	27.9416	16.7035	6.76875	5.32294
Background 1	13.6926	15.7986	15.856	18.6931	20.5842	19.4064	18.3585	29.5565	21.2317	22.9313	20.3863	16.7561	23.3212	19.0529	18.9404	20.7606	25.7446	22.4808	18.0625	18.745	20.8313	19.1469	14.7607	14.4457	16.9463	14.5227	32.273	5.47873	6.45817
Background 2	-0.088248	-0.103065	-0.112157	-0.123129	-0.138268	-0.12609	-0.120606	-0.192874	-0.129788	-0.147526	-0.132359	-0.109229	-0.193995	-0.123763	-0.12555	-0.217294	-0.192814	-0.163622	-0.139508	-0.146949	-0.169632	-0.169571	-0.126876	-0.12569	-0.18467	-0.144659	-0.426231	-0.0600294	-0.0644023
A Peak Width	1.02723	0.971584	1.01045	0.964785	0.95289	0.985037	0.943489	0.992187	0.929311	0.93125	0.951707	0.920486	0.903294	0.948001	0.994	0.876294	1.07223	1.041	1.04425	0.997276	0.969296	0.95771	1.05107	1.19711	0.918657	0.870189	0.821138	0.923252	0.949278
B Peak Width	0.654265	0.676034	0.649123	0.668065	0.667515	0.651032	0.656851	0.68581	0.64217	0.6588	0.654586	0.629238	0.635757	0.628025	0.622047	0.60252	0.648267	0.683092	0.619484	0.636582	0.644011	0.610768	0.622273	0.765115	0.5627	0.555883	0.510785	0.566684	0.549374
A Peak Centre Shift	45.7292	45.5206	45.489	45.0203	44.7826	44.8676	44.6561	44.7552	44.6956	44.7496	44.969	44.9031	45.2096	45.5005	45.475	45.217	44.796	45.0114	44.5881	44.6505	44.839	44.8731	44.9114	44.7833	44.9492	44.7929	45.2969	45.2543	44.8229
B Peak Centre Shift	50.9316	50.738	50.6535	50.156	49.9467	49.9732	49.7891	49.9036	49.8229	49.8338	50.0745	50.0735	50.3896	50.5884	50.6134	50.4142	49.9913	50.101	49.7032	49.755	49.9316	49.9332	49.9893	49.9012	50.0686	49.8284	50.3527	50.2404	49.8865
225K	VBG	A and B	PeakData
Wavelength	691.03	692.17	694.29	696.26	698.25	700.32	702.26	704.26	706.29	708.24	710.3	712.37	714.33	716.51
Intensity A	-1.79009	5.08996	5.3001	9.49636	8.33778	12.7505	21.0568	8.92309	13.4714	15.492	16.0304	18.3999	22.4619	16.3414
Intensity B	43.1733	51.1414	51.3982	82.6628	73.983	107.275	85.2981	89.9862	116.631	126.909	128.02	128.94	148.504	108.56
Background 1	5.08057	7.14415	7.10816	12.1426	9.54293	13.9168	11.7087	11.9329	12.2407	13.3436	16.9367	15.1504	14.7729	11.558
Background 2	0.0594317	-0.0432525	-0.0450047	-0.0778911	-0.0552354	-0.0843506	-0.0666151	-0.0823507	-0.0614287	-0.0644715	-0.11632	-0.0785982	-0.0595349	-0.0484808
A Peak Width	6.36384	1.25271	1.06075	1.03111	1.01857	0.980813	0.482498	1.08413	1.00848	1.09918	0.93879	1.00949	1.0733	1.23801
B Peak Width	0.607519	0.689126	0.661309	0.664247	0.650802	0.642899	0.742714	0.688658	0.641019	0.647102	0.659866	0.648173	0.649833	0.656563
A Peak Centre Shift	48	45.0749	45.1618	45.2467	45.3927	45.5725	45.8979	45.3774	44.8884	44.9574	44.8171	44.9388	44.7201	45.0303
B Peak Centre Shift	50.1742	50.1791	50.1652	50.2833	50.4929	50.5903	50.75	50.3856	49.9874	49.9892	49.8365	49.9917	49.7801	50.0714
225K	VBG	A and B	Upper Confidence Bands
Wavelength	691.03	692.17	694.29	696.26	698.25	700.32	702.26	704.26	706.29	708.24	710.3	712.37	714.33	716.51
Intensity A	8.62615	5.66438	5.85426	10.29	9.11091	13.9605	22.8259	11.5709	14.7238	16.599	19.48	19.5729	23.822	17.1581
Intensity B	63.7184	51.9117	52.0983	83.6487	74.9479	108.763	86.7448	93.2977	118.196	128.346	132.122	130.4	150.246	109.675
Background 1	17.7549	7.5174	7.39989	12.5777	9.98942	14.5307	12.3663	13.5236	13.0186	13.9799	18.8702	15.7652	15.5487	12.0911
Background 2	0.240385	-0.0368475	-0.0394992	-0.0699448	-0.047335	-0.0724054	-0.0540517	-0.0535669	-0.0478123	-0.0522498	-0.0803251	-0.0659329	-0.044172	-0.0383494
A Peak Width	65.5151	1.4822	1.23378	1.16561	1.1664	1.12423	0.541838	1.59275	1.15619	1.22251	1.25187	1.10894	1.17488	1.33735
B Peak Width	1.16183	0.704881	0.674888	0.676162	0.663536	0.656276	0.761555	0.727	0.653905	0.658153	0.691581	0.659247	0.661343	0.666818
A Peak Centre Shift	79.732	45.2171	45.273	45.333	45.4873	45.6657	45.9395	45.7001	44.9823	45.0361	45.0194	45.0032	44.7852	45.0924
B Peak Centre Shift	50.4571	50.1895	50.1742	50.2913	50.5013	50.5993	50.7626	50.411	49.996	49.9966	49.8577	49.9991	49.7878	50.0781
225K	VBG	A and B	Lower Confidence Bands
Wavelength	691.03	692.17	694.29	696.26	698.25	700.32	702.26	704.26	706.29	708.24	710.3	712.37	714.33	716.51
Intensity A	-12.2063	4.51555	4.74594	8.70274	7.56465	11.5404	19.2876	6.27533	12.219	14.3849	12.5809	17.227	21.1018	15.5247
Intensity B	22.6281	50.3712	50.6981	81.6768	73.0181	105.787	83.8514	86.6747	115.066	125.472	123.918	127.48	146.761	107.444
Background 1	-7.59374	6.77091	6.81642	11.7076	9.09645	13.3029	11.051	10.3421	11.4627	12.7073	15.0032	14.5357	13.9971	11.0249
Background 2	-0.121522	-0.0496574	-0.0505102	-0.0858373	-0.0631358	-0.0962958	-0.0791785	-0.111134	-0.0750452	-0.0766932	-0.152316	-0.0912634	-0.0748978	-0.0586122
A Peak Width	-52.7874	1.02321	0.887726	0.896612	0.870751	0.837394	0.423159	0.575514	0.86078	0.975848	0.625715	0.910037	0.97172	1.13866
B Peak Width	0.0532091	0.67337	0.64773	0.652333	0.638068	0.629521	0.723873	0.650316	0.628133	0.636051	0.628152	0.637099	0.638322	0.646308
A Peak Centre Shift	16.268	44.9328	45.0507	45.1604	45.2981	45.4793	45.8562	45.0546	44.7946	44.8787	44.6148	44.8744	44.655	44.9682
B Peak Centre Shift	49.8912	50.1687	50.1562	50.2754	50.4844	50.5814	50.7374	50.3602	49.9788	49.9819	49.8153	49.9844	49.7725	50.0646
225K	ORD	2A and 2B	Peakdata
Wavelength	700.38	702.11	704.25	706.24	708.15	710.12	712.28	714.44	716.37	718.4	720.35	722.25	724.46	726.39	728.56	730.35	732.38	734.42	736.42	738.23	740.45	742.31	744.4	746.16	748.38	750.27	755.33	760.29	765.13
Intensity A	4.44579	5.34483	4.10303	7.0206	6.87978	6.55898	5.99357	7.87992	7.79927	10.0058	7.54509	7.18123	8.38856	7.24437	7.28781	7.78936	7.45333	6.70955	5.36509	5.97559	5.56338	4.79585	4.08255	3.89238	2.68903	3.00146	2.96691	0.0611026	0.901523
Intensity B	27.7059	30.4562	27.1732	35.2671	35.9096	34.0752	33.0992	38.8066	34.7494	41.3626	31.7376	28.1853	31.7243	22.4952	22.4848	22.0566	21.5872	17.9091	12.2986	11.3686	12.01	9.32535	7.00802	5.92077	3.85549	4.48866	3.5779	0.0123743	0.000130196
Background 1	1.66243	6.14361	4.17456	4.99221	10.7287	9.01959	7.59602	16.1985	12.2246	10.1183	10.6455	11.0917	13.5152	11.4988	11.332	12.5454	14.0156	11.5419	9.04105	10.0225	10.8182	9.88307	7.24606	7.6872	7.19504	7.19628	16.9687	-7.36744	0.0173284
Background 2	0.0829168	0.0443513	0.0683377	0.0763238	0.0327161	0.040028	0.0568249	0.0290448	0.0292803	0.0677291	0.0342369	0.0211322	0.0238506	0.010387	0.0134697	0.0173532	0.026448	0.0284421	0.0114297	0.0081844	0.00766869	-0.000447165	0.00568556	0.000782802	-0.0133373	-0.005911	-0.121932	0.128096	0.0386363
A Peak Width	5.32248	6.07124	4.34203	6.47392	4.6319	5.22386	4.78319	4.32162	4.20415	4.05801	4.44276	3.55138	3.55811	2.80822	2.92175	3.25315	3.41879	2.81707	5.78424	2.84072	3.07724	2.82045	2.66272	2.78629	2.28782	2.57497	2.15511	0.0235853	0.544338
B Peak Width	1.04757	1.09209	0.981271	1.10325	1.16179	1.09793	1.0704	1.22904	1.19348	1.17563	1.15706	1.18285	1.19123	1.22505	1.1679	1.27175	1.22917	1.1773	0.990977	1.64955	1.17966	1.36353	1.20116	1.50212	1.21445	1.17239	8.41331	0.00422669	0.000894217
A Peak Centre Shift	90.4219	91.0771	90.2842	89.8807	89.7001	89.9941	89.6699	89.6645	89.5165	89.4945	89.7108	89.782	90.0721	90.3703	90.3895	90.1378	89.4269	89.6374	90.8591	89.3075	89.4852	89.4449	89.5036	89.4339	89.4384	89.5946	89.5251	88.3167	89.782
B Peak Centre Shift	100.692	100.555	100.355	99.9463	99.6619	99.7381	99.5311	99.5339	99.5474	99.5965	99.8594	99.8428	100.167	100.357	100.395	100.192	99.5865	99.6951	99.4447	99.5691	99.5986	99.5956	99.6414	99.4907	99.7011	99.5228	101	99.9075	98.5708
225K	ORD	2A and 2B	Upper Confidence Bands
Wavelength	700.38	702.11	704.25	706.24	708.15	710.12	712.28	714.44	716.37	718.4	720.35	722.25	724.46	726.39	728.56	730.35	732.38	734.42	736.42	738.23	740.45	742.31	744.4	746.16	748.38	750.27	755.33	760.29	765.13
Intensity A	7.61208	5.69126	7.8251	7.60523	7.2182	6.90775	8.32145	8.29576	8.23137	10.8066	7.93786	7.60003	8.84394	7.63859	7.68881	8.18737	8.23211	7.79511	6.42134	6.72665	5.88265	5.12469	4.37426	4.17657	2.97493	3.26404	3.39926	52000.3	7.94714
Intensity B	34.3047	31.1769	34.4907	36.2833	36.5509	34.7735	37.593	39.5596	35.5287	42.6722	32.4588	28.8809	32.4926	23.0845	23.11	22.6818	22.8575	19.5623	14.7395	12.3426	12.5167	9.79111	7.43656	6.30272	4.2434	4.87149	4.48938	2.85642e+07	2.35992e+07
Background 1	8.90919	7.06371	12.3549	6.8867	11.432	9.86781	13.309	16.9701	13.0577	12.24	11.5355	11.9272	14.2695	12.0011	11.8717	13.1376	15.2823	13.16	11.1457	11.0818	11.3022	10.3331	7.63907	8.09115	7.56862	7.55802	18.5419	-0.921923	4.61482
Background 2	0.144072	0.0518618	0.137588	0.0913613	0.0388716	0.0472364	0.105329	0.0361101	0.0368142	0.0854263	0.0420209	0.0285306	0.0310229	0.0157079	0.0190619	0.023345	0.038884	0.0443223	0.0328314	0.0194537	0.0126517	0.00475361	0.0101252	0.00529461	-0.00869162	-0.00150452	-0.0970349	0.203398	0.0912954
A Peak Width	13.7718	7.04154	12.5505	7.73679	5.1178	5.85906	8.87397	4.78907	4.67749	4.73746	4.93107	3.95665	3.9201	3.06875	3.19947	3.55189	4.07759	3.61684	8.52073	3.4627	3.38997	3.15067	2.98381	3.13663	2.6897	2.95398	2.77127	10453	6.84746
B Peak Width	1.45004	1.13634	1.39362	1.15738	1.19524	1.13492	1.30391	1.26759	1.23622	1.23839	1.19904	1.22849	1.23663	1.27565	1.2188	1.32905	1.34349	1.34608	1.33069	1.88244	1.25809	1.47543	1.31892	1.66238	1.41835	1.33711	11.2558	4.88482e+06	8.10129e+07
A Peak Centre Shift	94.2843	91.4865	94.2035	90.3456	89.9345	90.2794	91.5287	89.9008	89.7549	89.8023	89.9442	89.9894	90.268	90.5239	90.5512	90.306	89.7885	90.0951	92.1663	89.6682	89.6629	89.6385	89.6938	89.6386	89.6798	89.8185	89.829	753.205	94.0337
B Peak Centre Shift	100.943	100.581	100.62	99.9782	99.6828	99.7607	99.6776	99.558	99.5744	99.6374	99.8859	99.8722	100.196	100.389	100.428	100.229	99.6593	99.8042	99.6418	99.7117	99.6485	99.6641	99.715	99.5882	99.8232	99.6229	101.794	34484.5	2.82215e+07
225K	ORD	2A and 2B	Lower Confidence Bands
Wavelength	700.38	702.11	704.25	706.24	708.15	710.12	712.28	714.44	716.37	718.4	720.35	722.25	724.46	726.39	728.56	730.35	732.38	734.42	736.42	738.23	740.45	742.31	744.4	746.16	748.38	750.27	755.33	760.29	765.13
Intensity A	1.2795	4.9984	0.380969	6.43597	6.54137	6.21021	3.66568	7.46408	7.36717	9.20492	7.15232	6.76243	7.93318	6.85014	6.88682	7.39134	6.67455	5.62399	4.30883	5.22453	5.24411	4.46702	3.79084	3.60818	2.40314	2.73889	2.53456	-52000.1	-6.1441
Intensity B	21.1071	29.7355	19.8557	34.2509	35.2684	33.377	28.6055	38.0536	33.9701	40.0529	31.0164	27.4896	30.956	21.9058	21.8596	21.4313	20.317	16.2559	9.85763	10.3947	11.5033	8.85959	6.57948	5.53883	3.46757	4.10583	2.66643	-2.85642e+07	-2.35992e+07
Background 1	-5.58434	5.22352	-4.0058	3.09773	10.0255	8.17137	1.88304	15.4269	11.3914	7.9966	9.75547	10.2562	12.7609	10.9965	10.7924	11.9532	12.7489	9.92383	6.93637	8.96313	10.3341	9.43309	6.85306	7.28326	6.82145	6.83453	15.3955	-13.813	-4.58016
Background 2	0.0217619	0.0368408	-0.000912257	0.0612862	0.0265607	0.0328196	0.00832069	0.0219796	0.0217463	0.0500319	0.026453	0.0137338	0.0166783	0.00506614	0.00787741	0.0113615	0.0140119	0.0125619	-0.00997197	-0.00308488	0.00268568	-0.00564794	0.00124592	-0.00372901	-0.017983	-0.0103175	-0.14683	0.0527947	-0.0140227
A Peak Width	-3.12684	5.10093	-3.86643	5.21105	4.146	4.58866	0.692413	3.85417	3.73082	3.37857	3.95446	3.14611	3.19612	2.54769	2.64402	2.9544	2.75999	2.01731	3.04774	2.21874	2.76452	2.49023	2.34164	2.43594	1.88594	2.19597	1.53895	-10453	-5.75878
B Peak Width	0.645093	1.04783	0.568919	1.04912	1.12834	1.06095	0.836882	1.19048	1.15073	1.11287	1.11509	1.13721	1.14583	1.17445	1.117	1.21446	1.11486	1.00852	0.651264	1.41666	1.10123	1.25163	1.08341	1.34185	1.01054	1.00767	5.57077	-4.88482e+06	-8.10129e+07
A Peak Centre Shift	86.5595	90.6677	86.3649	89.4158	89.4658	89.7087	87.811	89.4281	89.278	89.1868	89.4774	89.5746	89.8762	90.2167	90.2279	89.9696	89.0654	89.1797	89.552	88.9467	89.3075	89.2513	89.3134	89.2293	89.197	89.3708	89.2211	-576.572	85.5303
B Peak Centre Shift	100.441	100.529	100.089	99.9144	99.641	99.7154	99.3846	99.5098	99.5204	99.5556	99.8329	99.8134	100.137	100.325	100.363	100.156	99.5137	99.5861	99.2475	99.4266	99.5486	99.5272	99.5677	99.3931	99.579	99.4226	100.206	-34284.7	-2.82213e+07
225K	VBG	2A and 2B	PeakData
Wavelength	691.03	692.17	694.29	696.26	698.25	700.32	702.26	704.26	706.29	708.24	710.3	712.37	714.33	716.51
Intensity A	1.65624	2.17911	1.74717	2.7898	2.50463	3.72427	3.44663	2.79419	9.33382	4.83672	4.6226	5.29497	2.5905	4.76529
Intensity B	11.0075	13.0881	12.3533	19.1034	16.5397	24.0127	20.361	22.8093	23.5078	27.6498	26.8996	26.45	28.0954	21.5348
Background 1	1.63392	0.474485	2.55002	4.42329	3.43439	5.76121	4.74204	6.78925	-8.5405	6.51868	1.26751	8.32851	30.1946	6.34329
Background 2	0.0188488	0.0328248	0.0136491	0.0202579	0.0202211	0.01888	0.0214977	0.000114434	0.121716	0.0226671	0.0917691	0.0138442	-0.162987	0.018658
A Peak Width	6.51095	9.1655	7.94704	7.27343	6.73547	6.8099	6.34408	4.77017	20	5.67198	5.00325	3.8572	0.564752	5.17192
B Peak Width	1.06996	0.984614	0.976311	1.07655	1.10745	1.01947	1.16704	1.01772	1.05226	1.05482	1.07923	1.13055	0.922554	1.10349
A Peak Centre Shift	90.756	90.5054	92.1789	91.0837	90.8811	91.6258	91.7372	91.4887	85	90.3323	89.4945	90.0676	89.7017	90.1964
B Peak Centre Shift	99.9177	99.9942	99.9803	100.021	100.263	100.35	100.514	100.135	99.7613	99.7605	99.6147	99.7749	99.5581	99.9155
225K	VBG	2A and 2B	Upper Confidence Bands
Wavelength	691.03	692.17	694.29	696.26	698.25	700.32	702.26	704.26	706.29	708.24	710.3	712.37	714.33	716.51
Intensity A	2.62304	2.94167	2.87182	4.15159	3.83093	5.69323	5.38079	5.01856	5.60962	6.92304	7.19449	8.36308	8.87986	6.75242
Intensity B	2.82384	3.02341	3.3166	5.50806	4.79171	6.91511	6.25076	5.69546	6.27155	6.86088	9.9423	7.59897	7.8622	5.9949
Background 1	-2.52775	-3.18283	-0.606189	-0.85978	-0.548805	3.00562	2.22883	3.01204	1.18466	5.77443	22.9029	16.4986	14.0766	9.5325
Background 2	0.0634519	0.0747882	0.049293	0.0781055	0.062808	0.0589421	0.0573075	0.044156	0.0691726	0.0430241	0.0543722	2.72679e-05	0.0217945	0.0235456
A Peak Width	11.7268	13.2848	12.3138	9.78595	10.2494	11.196	10.7668	9.5437	9.07527	10.8475	13.6931	10.3843	10.0847	10.9865
B Peak Width	1.74604	1.42288	1.73371	1.53653	1.62324	1.44524	1.35317	1.51377	1.60925	1.44186	3.52616	2.38462	2.07729	1.68965
A Peak Centre Shift	141.348	141.414	141.983	141.548	141.38	141.815	141.651	141.027	140.423	141.158	144.441	140.523	140.276	140.637
B Peak Centre Shift	149.916	149.8	150.034	149.829	150.031	150.104	150.318	150.12	149.859	149.573	150.468	149.796	149.658	149.871
225K	VBG	2A and 2B	Lower Confidence Bands
Wavelength	691.03	692.17	694.29	696.26	698.25	700.32	702.26	704.26	706.29	708.24	710.3	712.37	714.33	716.51
Intensity A	1.2795	4.9984	0.380969	6.43597	6.54137	6.21021	3.66568	7.46408	7.36717	9.20492	7.15232	6.76243	7.93318	6.85014	6.88682	7.39134	6.67455	5.62399	4.30883	5.22453	5.24411	4.46702	3.79084	3.60818	2.40314	2.73889	2.53456	-52000.1	-6.1441
Intensity B	21.1071	29.7355	19.8557	34.2509	35.2684	33.377	28.6055	38.0536	33.9701	40.0529	31.0164	27.4896	30.956	21.9058	21.8596	21.4313	20.317	16.2559	9.85763	10.3947	11.5033	8.85959	6.57948	5.53883	3.46757	4.10583	2.66643	-2.85642e+07	-2.35992e+07
Background 1	-5.58434	5.22352	-4.0058	3.09773	10.0255	8.17137	1.88304	15.4269	11.3914	7.9966	9.75547	10.2562	12.7609	10.9965	10.7924	11.9532	12.7489	9.92383	6.93637	8.96313	10.3341	9.43309	6.85306	7.28326	6.82145	6.83453	15.3955	-13.813	-4.58016
Background 2	0.0217619	0.0368408	-0.000912257	0.0612862	0.0265607	0.0328196	0.00832069	0.0219796	0.0217463	0.0500319	0.026453	0.0137338	0.0166783	0.00506614	0.00787741	0.0113615	0.0140119	0.0125619	-0.00997197	-0.00308488	0.00268568	-0.00564794	0.00124592	-0.00372901	-0.017983	-0.0103175	-0.14683	0.0527947	-0.0140227
A Peak Width	-3.12684	5.10093	-3.86643	5.21105	4.146	4.58866	0.692413	3.85417	3.73082	3.37857	3.95446	3.14611	3.19612	2.54769	2.64402	2.9544	2.75999	2.01731	3.04774	2.21874	2.76452	2.49023	2.34164	2.43594	1.88594	2.19597	1.53895	-10453	-5.75878
B Peak Width	0.645093	1.04783	0.568919	1.04912	1.12834	1.06095	0.836882	1.19048	1.15073	1.11287	1.11509	1.13721	1.14583	1.17445	1.117	1.21446	1.11486	1.00852	0.651264	1.41666	1.10123	1.25163	1.08341	1.34185	1.01054	1.00767	5.57077	-4.88482e+06	-8.10129e+07
A Peak Centre Shift	86.5595	90.6677	86.3649	89.4158	89.4658	89.7087	87.811	89.4281	89.278	89.1868	89.4774	89.5746	89.8762	90.2167	90.2279	89.9696	89.0654	89.1797	89.552	88.9467	89.3075	89.2513	89.3134	89.2293	89.197	89.3708	89.2211	-576.572	85.5303
B Peak Centre Shift	100.441	100.529	100.089	99.9144	99.641	99.7154	99.3846	99.5098	99.5204	99.5556	99.8329	99.8134	100.137	100.325	100.363	100.156	99.5137	99.5861	99.2475	99.4266	99.5486	99.5272	99.5677	99.3931	99.579	99.4226	100.206	-34284.7	-2.82213e+07
225K	ORD	3B	PeakData
Wavelength	700.38	702.11	704.25	706.24	708.15	710.12	712.28	714.44	716.37	718.4	720.35	722.25	724.46	726.39	728.56	730.35	732.38	734.42	736.42	738.23	740.45	742.31	744.4	746.16	748.38	750.27	755.33	760.29	765.13
Intensity B	6.22472	6.49398	5.96564	8.01374	7.55103	6.59514	6.54301	9.70189	10.9977	7.9967	5.19895	4.22672	6.41866	4.2195	4.66718	5.36813	5.86664	3.56566	3.84303	3.85781	3.96394	4.18937	3.69434	3.61614	6.58039	8.31873	3349.28	8.41599
Background 1	13.8475	17.0393	10.7643	17.7509	16.2404	16.984	19.6017	15.8279	21.3675	17.1626	8.97622	6.00036	0.346535	7.0448e-10	1.10642e-07	4.33863e-14	2.22353e-14	2.33929e-14	3.85032e-10	2.53659e-12	2.22068e-14	2.22065e-14	2.2209e-14	2.2205e-14	3.10643	2.62913	12.1364	3.52059
Background 2	0.000940324	-0.0054003	0.0269102	0.0151027	0.0262813	0.0138194	-0.00743752	0.0363363	-0.0401275	0.0596667	0.0791839	0.0893159	0.132184	0.106284	0.107933	0.124066	0.140511	0.12883	0.0892303	0.0955676	0.0991017	0.0820138	0.0634169	0.064105	0.0196219	0.0282102	-0.0516542	-0.011652
B Peak Width	1.4131	1.2556	1.07901	0.845937	1.43197	1.26662	1.16784	10	9.99999	0.80256	1.23637	1.33061	10	10	10	10	10	10	10	10	10	10	10	10	8.49132	9.78521	0.498905	6.31427
B Peak Centre Shift	150.257	150.08	149.933	149.613	149.002	149.172	149.043	147	147	149.159	149.279	149.147	147	147	147	147	147	147.559	147	147	147	147	147	147	153	152.999	152.998	153
225K	ORD	3B	Upper Confidence Bands
Wavelength	700.38	702.11	704.25	706.24	708.15	710.12	712.28	714.44	716.37	718.4	720.35	722.25	724.46	726.39	728.56	730.35	732.38	734.42	736.42	738.23	740.45	742.31	744.4	746.16	748.38	750.27	755.33	760.29	765.13
Intensity B	7.59699	8.04988	7.34253	10.3382	9.58791	8.60084	8.47324	12.821	16.0376	11.5766	7.50877	6.31716	8.87627	5.13366	13.4111	6.36563	6.81098	5.34755	4.68708	4.61588	4.61872	4.87843	4.23065	4.20024	176.371	113.866	4.06194e+07	1287.78
Background 1	17.7739	21.2917	14.3177	23.1674	22.3777	22.7245	24.9631	23.7369	33.6994	25.7765	16.2753	12.8781	10.0704	NaN	28.9082	NaN	NaN	NaN	NaN	NaN	NaN	NaN	NaN	NaN	17.4725	18.907	27.1132	18.1601
Background 2	0.0272688	0.0229425	0.0504489	0.0508014	0.0687057	0.0532396	0.0291122	0.104439	0.065645	0.117454	0.13085	0.137819	0.210668	0.110407	0.364122	0.128692	0.144946	0.137919	0.0921009	0.0986033	0.101788	0.0840674	0.065063	0.0659424	0.175601	0.204768	0.125277	0.158746
B Peak Width	1.92392	1.74003	1.47257	1.22479	2.07994	1.89951	1.72526	14.2019	16.1246	1.35853	2.17576	2.46262	NaN	NaN	24.5373	NaN	NaN	NaN	NaN	NaN	NaN	NaN	NaN	NaN	38.2893	19.2688	3020.85	353.138
B Peak Centre Shift	150.569	150.381	150.182	149.858	149.388	149.558	149.388	NaN	NaN	149.518	149.828	149.804	NaN	NaN	152.524	NaN	NaN	152.072	149.705	NaN	NaN	NaN	NaN	NaN	318.934	257.91	377.604	614.949
225K	ORD	3B	Lower Confidence Bands
Wavelength	700.38	702.11	704.25	706.24	708.15	710.12	712.28	714.44	716.37	718.4	720.35	722.25	724.46	726.39	728.56	730.35	732.38	734.42	736.42	738.23	740.45	742.31	744.4	746.16	748.38	750.27	755.33	760.29	765.13
Intensity B	4.85245	4.93809	4.58875	5.68927	5.51415	4.58944	4.61279	6.58273	5.95782	4.41685	2.88912	2.13628	3.96105	3.30533	-4.07669	4.37063	4.92231	1.78378	2.99899	3.09974	3.30916	3.5003	3.15802	3.03204	-163.21	-97.229	-4.06127e+07	-1270.95
Background 1	9.92105	12.7869	7.21088	12.3344	10.1032	11.2435	14.2404	7.91884	9.0356	8.54864	1.6771	-0.877361	-9.37735	NaN	-28.9082	NaN	NaN	NaN	NaN	NaN	NaN	NaN	NaN	NaN	-11.2596	-13.6487	-2.84031	-11.119
Background 2	-0.0253881	-0.0337431	0.00337141	-0.020596	-0.0161431	-0.0256008	-0.0439872	-0.0317664	-0.1459	0.00187893	0.0275177	0.0408132	0.053699	0.10216	-0.148255	0.11944	0.136075	0.11974	0.0863597	0.0925318	0.0964154	0.0799602	0.0617707	0.0622677	-0.136357	-0.148347	-0.228585	-0.18205
B Peak Width	0.902286	0.771174	0.685451	0.467087	0.783992	0.633731	0.610422	5.79807	3.87539	0.246587	0.296984	0.198607	NaN	NaN	-4.53728	NaN	NaN	NaN	NaN	NaN	NaN	NaN	NaN	NaN	-21.3067	0.301595	-3019.85	-340.509
B Peak Centre Shift	149.945	149.779	149.684	149.368	148.615	148.787	148.698	NaN	NaN	148.8	148.73	148.489	NaN	NaN	141.476	NaN	NaN	143.045	144.295	NaN	NaN	NaN	NaN	NaN	-12.9338	48.0882	-71.6085	-308.95
225K	VBG	2A+B and 3B	PeakData
Wavelength	691.03	692.17	694.29	696.26	698.25	700.32	702.26	704.26	706.29	708.24	710.3	712.37	714.33	716.51
Intensity A	2.21645	2.21955	2.36278	3.6173	3.32916	5.00783	4.75461	4.46546	5.29721	6.41903	4.83928	7.37302	8.01071	6.06019
Intensity B	2.43779	2.65185	2.90032	4.81492	4.31629	7.82377	5.53247	4.90491	5.70945	6.21916	5.78098	6.8703	7.13205	5.41244
Background 1	-4.23098	-6.09055	-2.21345	-3.32251	-2.69813	0.668793	0.238386	0.632287	-0.035248	4.40155	13.9197	12.8274	10.8865	7.27232
Background 2	0.0600394	0.0792544	0.0488099	0.0787185	0.0646768	0.0539354	0.0522356	0.0449058	0.0610713	0.0309644	-0.0170498	-0.0335948	-0.00710549	0.00287699
A Peak Width	8.41703	8.32919	8.8223	7.73947	7.87923	9.14859	8.60496	7.92142	7.87513	9.37801	6.26917	9.03647	8.81654	9.47795
B Peak Width	1.31544	1.04368	1.32325	1.19937	1.30122	0.958662	1.15346	1.08611	1.32611	1.20639	1.4145	1.98913	1.71768	1.38341
A Peak Centre Shift	140.08	139.617	140.539	140.532	140.397	141.158	140.917	140.444	139.942	140.55	140.976	139.962	139.736	140.02
B Peak Centre Shift	149.679	149.577	149.818	149.654	149.859	149.966	150.176	149.81	149.713	149.454	149.393	149.623	149.496	149.725
225K	VBG	2A+B and 3B	Upper Confidence Bands
Wavelength	691.03	692.17	694.29	696.26	698.25	700.32	702.26	704.26	706.29	708.24	710.3	712.37	714.33	716.51
Intensity A	2.5214	2.63139	2.61487	3.94552	3.6051	5.38104	5.0762	4.73958	5.60962	6.92304	7.19449	8.36308	8.87986	6.75242
Intensity B	2.86515	3.28405	3.31995	5.44773	4.80904	10.19	7.05678	5.48076	6.27155	6.86088	9.9423	7.59897	7.8622	5.9949
Background 1	-2.90285	-4.14562	-1.34562	-2.04662	-1.56998	1.72768	1.25975	1.63745	1.18466	5.77443	22.9029	16.4986	14.0766	9.5325
Background 2	0.067766	0.0904705	0.0542775	0.0867773	0.0716322	0.0621455	0.0596652	0.0518714	0.0691726	0.0430241	0.0543722	2.72679e-05	0.0217945	0.0235456
A Peak Width	11.0667	11.7426	11.163	9.58099	9.57232	10.7016	10.0322	9.16799	9.07527	10.8475	13.6931	10.3843	10.0847	10.9865
B Peak Width	1.75414	1.49277	1.69031	1.49138	1.5783	1.27814	1.55794	1.3482	1.60925	1.44186	3.52616	2.38462	2.07729	1.68965
A Peak Centre Shift	141.06	140.779	141.468	141.277	141.058	141.802	141.512	140.951	140.423	141.158	144.441	140.523	140.276	140.637
B Peak Centre Shift	149.902	149.823	150.001	149.808	150.005	150.07	150.321	149.983	149.859	149.573	150.468	149.796	149.658	149.871
225K	VBG	2A+B and 3B	Lower Confidence Bands
Wavelength	691.03	692.17	694.29	696.26	698.25	700.32	702.26	704.26	706.29	708.24	710.3	712.37	714.33	716.51
Intensity A	1.91149	1.80771	2.1107	3.28908	3.05322	4.63461	4.43302	4.19135	4.98481	5.91503	2.48407	6.38295	7.14156	5.36795
Intensity B	2.01044	2.01964	2.48068	4.18211	3.82353	5.45753	4.00816	4.32906	5.14736	5.57744	1.61967	6.14162	6.40189	4.82999
Background 1	-5.55912	-8.03548	-3.08127	-4.5984	-3.82628	-0.390096	-0.782976	-0.372874	-1.25516	3.02868	4.9365	9.15623	7.69632	5.01213
Background 2	0.0523127	0.0680384	0.0433422	0.0706597	0.0577213	0.0457253	0.044806	0.0379401	0.05297	0.0189046	-0.0884717	-0.0672168	-0.0360055	-0.0177916
A Peak Width	5.7674	4.91575	6.48157	5.89795	6.18615	7.59562	7.17777	6.67486	6.67499	7.90848	-1.1548	7.68861	7.54836	7.96941
B Peak Width	0.876732	0.594582	0.956193	0.907354	1.02414	0.639188	0.748973	0.824033	1.04298	0.970924	-0.697172	1.59365	1.35808	1.07717
A Peak Centre Shift	139.1	138.454	139.61	139.788	139.736	140.515	140.323	139.937	139.461	139.941	137.512	139.401	139.197	139.403
B Peak Centre Shift	149.456	149.331	149.636	149.5	149.714	149.863	150.031	149.637	149.567	149.335	148.318	149.451	149.334	149.579

## Sheet: Room Temp
Temperature	Filter	Mode	Data Type
225K	ORD	A and B	PeakData
Wavelength	700.51	702.41	704.42	706.33	708.45	710.52	712.36	714.44	716.3	718.4	720.3	722.42	724.25	726.38	728.41	730.35	732.38	734.43	736.33	738.15	740.47	742.3	744.41	746.27	748.38	750.19	755.09	760.29	765.32	770.18	775.09
Intensity A	10.488	9.42065	8.26674	8.58172	11.6204	12.5377	11.7909	12.775	11.3124	10.7698	13.8175	14.7421	18.4564	14.1234	13.0822	12.1033	13.9887	13.7916	11.3052	9.83752	10.9542	6.29095	5.19443	3.7234	6.82348	4.79459	2.94319	3.57283	5.1468	8.02881	8.63563
Intensity B	112.066	93.223	94.6551	95.8457	112.163	118.212	123.281	113.186	98.6192	108.236	122.6	137.265	147.773	116.32	97.9395	91.4856	90.576	84.26	68.2712	52.7547	51.4248	27.8139	22.6672	12.7538	19.8141	13.0591	7.38349	7.21002	7.16999	11.0722	9.87382
Background 1	39.5107	30.9662	31.7571	29.2261	32.8823	35.8934	36.9555	36.6998	29.0985	34.3418	31.3142	34.7608	37.8957	29.7028	28.2391	26.684	28.2335	27.4119	21.7561	20.5638	19.6977	10.2293	7.62798	5.25674	9.51581	6.14985	4.08766	6.86633	7.41025	11.4459	15.5757
Background 2	-0.276926	-0.232801	-0.23634	-0.201977	-0.234311	-0.258186	-0.256428	-0.26768	-0.210723	-0.258204	-0.211505	-0.229168	-0.251147	-0.196374	-0.225124	-0.163625	-0.1955	-0.205484	-0.161028	-0.13707	-0.163941	-0.0783374	-0.0564927	-0.0357801	-0.07399	-0.0457289	-0.0305401	-0.0662969	-0.0654253	-0.10245	-0.14857
A Peak Width	1.68236	1.35352	1.39244	1.78518	1.39467	1.25116	1.52173	1.33558	1.31008	1.42737	1.51289	1.28496	1.20475	1.39306	1.10876	1.36092	1.25959	1.27314	1.2964	1.22195	1.13538	1.2393	1.165	1.11899	1.06347	1.12009	1.15329	1.07272	1.11425	1.30438	1.18804
B Peak Width	0.799693	0.725396	0.710871	0.72257	0.727033	0.71226	0.724798	0.741682	0.712919	0.72908	0.707441	0.724199	0.714466	0.715137	0.680671	0.727407	0.734772	0.72976	0.706755	0.722026	0.688721	0.697013	0.639227	0.696853	0.668647	0.650973	0.667201	0.595266	0.698707	0.598927	0.59999
A Peak Centre Shift	45.2821	45.0009	45.072	44.2997	44.3945	44.3523	44.4071	44.332	44.2657	44.3903	44.202	44.3929	44.5658	45.2126	44.9967	44.8258	44.7529	44.6071	44.3825	44.2954	44.395	44.6158	44.4394	44.4248	44.5788	44.4663	44.9828	45.0507	44.1191	44.2765	44.2856
B Peak Centre Shift	50.1527	49.7964	49.9084	49.3472	49.3388	49.2862	49.3851	49.5	49.1685	49.3526	49.2212	49.3872	49.4934	50.1551	49.9817	49.9112	49.7624	49.5745	49.3979	49.3621	49.3862	49.6055	49.4989	49.4243	49.6482	49.5054	50.0069	50.0415	49.0914	49.3657	49.316
225K	ORD	A and B	Upper Confidence Bands
Wavelength	700.51	702.41	704.42	706.33	708.45	710.52	712.36	714.44	716.3	718.4	720.3	722.42	724.25	726.38	728.41	730.35	732.38	734.43	736.33	738.15	740.47	742.3	744.41	746.27	748.38	750.19	755.09	760.29	765.32	770.18	775.09
Intensity A	11.6492	10.3309	9.14915	9.40352	12.6157	13.6464	12.9321	13.9368	12.4065	13.4794	14.7522	16.0656	19.7006	15.178	17.0279	14.5938	15.0054	14.7743	12.1198	10.4193	11.6021	6.72183	5.5698	4.0819	7.22192	5.13804	3.21505	3.88925	5.49335	8.41436	9.04286
Intensity B	113.732	94.4554	95.8741	97.0841	113.528	119.668	124.899	114.733	100.088	111.972	123.954	139.014	149.375	117.78	102.954	94.8621	91.8947	85.5493	69.3661	53.5061	52.2525	28.3848	23.1709	13.1989	20.3135	13.5053	7.73853	7.63225	7.6042	11.636	10.441
Background 1	40.6895	31.845	32.7147	30.4967	33.8704	37.0262	38.4442	37.7952	30.2088	37.5792	32.2399	36.0418	39.1388	30.6446	31.5581	29.2522	29.3271	28.2917	22.5485	21.1521	20.232	10.6203	7.98151	5.77753	9.92749	6.55164	4.36905	7.15912	7.81238	11.8811	16.1024
Background 2	-0.2564	-0.217801	-0.220521	-0.181952	-0.217098	-0.238979	-0.232138	-0.247945	-0.191309	-0.203663	-0.194302	-0.205964	-0.229189	-0.177785	-0.161611	-0.116708	-0.176117	-0.188	-0.145895	-0.126169	-0.152711	-0.0704123	-0.0496073	-0.0271676	-0.066451	-0.0386001	-0.0251644	-0.060236	-0.0579071	-0.0936451	-0.138737
A Peak Width	2.02137	1.57966	1.6551	2.11872	1.60167	1.44119	1.79298	1.541	1.52803	2.07029	1.69038	1.48	1.34195	1.56764	1.64924	1.83899	1.41608	1.42333	1.45308	1.34317	1.24337	1.37874	1.3027	1.31126	1.16611	1.25647	1.32926	1.22493	1.24062	1.40941	1.28389
B Peak Width	0.818791	0.740326	0.725123	0.737407	0.74078	0.725786	0.739707	0.757328	0.729343	0.768317	0.719619	0.73845	0.726399	0.729176	0.733937	0.769034	0.751326	0.747154	0.724294	0.737885	0.705876	0.719216	0.660915	0.734738	0.694349	0.684933	0.716465	0.648628	0.76396	0.645873	0.652596
A Peak Centre Shift	45.4746	45.1333	45.2222	44.4713	44.5152	44.4635	44.5555	44.4544	44.3935	44.7526	44.3058	44.5091	44.6475	45.3178	45.3323	45.1083	44.845	44.6985	44.4766	44.368	44.4623	44.7012	44.5238	44.5315	44.641	44.5466	45.0897	45.1457	44.1943	44.3393	44.3416
B Peak Centre Shift	50.1648	49.806	49.9177	49.3566	49.3477	49.295	49.3947	49.5102	49.1791	49.3779	49.229	49.3964	49.5011	50.1641	50.0166	49.9382	49.7731	49.5857	49.4093	49.3724	49.3973	49.6199	49.5131	49.4487	49.6651	49.5277	50.0391	50.0764	49.1338	49.3963	49.3505
225K	ORD	A and B	Lower Confidence Bands
Wavelength	700.51	702.41	704.42	706.33	708.45	710.52	712.36	714.44	716.3	718.4	720.3	722.42	724.25	726.38	728.41	730.35	732.38	734.43	736.33	738.15	740.47	742.3	744.41	746.27	748.38	750.19	755.09	760.29	765.32	770.18	775.09
Intensity A	9.32687	8.51042	7.38434	7.75991	10.625	11.4289	10.6498	11.6132	10.2184	8.06015	12.8828	13.4186	17.2122	13.0687	9.13642	9.61276	12.972	12.8089	10.4906	9.25572	10.3063	5.86007	4.81906	3.36491	6.42505	4.45114	2.67134	3.2564	4.80025	7.64326	8.22839
Intensity B	110.4	91.9907	93.4361	94.6073	110.798	116.757	121.664	111.64	97.1499	104.501	121.247	135.517	146.17	114.86	92.9253	88.1091	89.2573	82.9706	67.1763	52.0033	50.597	27.243	22.1635	12.3087	19.3146	12.6129	7.02845	6.78779	6.73578	10.5084	9.30669
Background 1	38.3318	30.0875	30.7996	27.9555	31.8942	34.7606	35.4669	35.6045	27.9883	31.1044	30.3885	33.4797	36.6526	28.7609	24.9202	24.1158	27.1399	26.5321	20.9636	19.9756	19.1635	9.83832	7.27445	4.73594	9.10413	5.74805	3.80626	6.57354	7.00812	11.0107	15.049
Background 2	-0.297451	-0.2478	-0.252159	-0.222002	-0.251523	-0.277393	-0.280719	-0.287415	-0.230136	-0.312745	-0.228708	-0.252372	-0.273104	-0.214964	-0.288638	-0.210542	-0.214883	-0.222967	-0.176161	-0.147972	-0.175171	-0.0862626	-0.063378	-0.0443925	-0.081529	-0.0528576	-0.0359159	-0.0723578	-0.0729434	-0.111254	-0.158402
A Peak Width	1.34335	1.12738	1.12978	1.45164	1.18767	1.06112	1.25047	1.13016	1.09213	0.784449	1.33541	1.08992	1.06755	1.21847	0.568284	0.882842	1.10309	1.12295	1.13972	1.10072	1.0274	1.09986	1.0273	0.926727	0.960828	0.983702	0.977327	0.920514	0.987872	1.19936	1.09219
B Peak Width	0.780594	0.710466	0.696619	0.707734	0.713286	0.698735	0.709889	0.726036	0.696496	0.689843	0.695263	0.709948	0.702533	0.701097	0.627405	0.685779	0.718218	0.712366	0.689217	0.706168	0.671566	0.67481	0.617538	0.658968	0.642945	0.617014	0.617938	0.541904	0.633453	0.55198	0.547383
A Peak Centre Shift	45.0896	44.8685	44.9218	44.1281	44.2737	44.241	44.2587	44.2097	44.138	44.0281	44.0983	44.2767	44.4842	45.1074	44.6612	44.5433	44.6609	44.5157	44.2884	44.2228	44.3276	44.5305	44.355	44.3181	44.5166	44.3861	44.876	44.9557	44.0439	44.2136	44.2295
B Peak Centre Shift	50.1406	49.7867	49.8992	49.3377	49.3299	49.2774	49.3756	49.4898	49.1578	49.3273	49.2133	49.3779	49.4856	50.146	49.9468	49.8842	49.7516	49.5633	49.3865	49.3518	49.3751	49.5912	49.4846	49.4	49.6314	49.4831	49.9747	50.0066	49.049	49.3352	49.2815
225K	VBG	A and B	PeakData
Wavelength	690.92	692.47	694.37	696.2	698.33	700.67	702.3	704.38	706.1	708.51	710.53	712.4	714.54	716.37
Intensity A	4.87281	6.25049	10.1428	10.295	9.67024	12.6857	12.8714	14.2086	13.2148	-4.32435	18.1807	17.6347	18.1481	21.7667
Intensity B	53.2256	61.413	91.4155	96.8615	100.926	121.431	120.753	122.509	125.116	148.573	155.188	163.583	145.738	165.608
Background 1	20.9012	19.6432	30.1883	30.7957	31.2062	38.5513	29.6652	29.6843	31.4054	39.0373	36.136	33.5274	30.456	33.456
Background 2	-0.162325	-0.144005	-0.23578	-0.224325	-0.220646	-0.249173	-0.206903	-0.200295	-0.220936	-0.276998	-0.227138	-0.22143	-0.192692	-0.204385
A Peak Width	1.56023	1.31892	1.14832	1.13822	1.40693	1.17992	1.20375	1.28632	1.15145	0.237371	1.31082	1.2622	1.19577	1.16727
B Peak Width	0.748099	0.716652	0.731505	0.721481	0.731972	0.723868	0.706035	0.716936	0.683558	0.750147	0.742975	0.692868	0.77364	0.691526
A Peak Centre Shift	45.5584	44.9433	44.6634	45.3662	45.5315	44.9273	45.2859	44.8398	44.5623	48	44.6841	44.4519	44.4905	44.8395
B Peak Centre Shift	49.9279	49.5203	49.5545	50.2226	50.23	49.8603	50.2058	49.9382	49.5736	49.3319	49.6538	49.5258	49.6363	49.8269
225K	VBG	A and B	Upper Confidence Bands
Wavelength	690.92	692.47	694.37	696.2	698.33	700.67	702.3	704.38	706.1	708.51	710.53	712.4	714.54	716.37
Intensity A	5.6451	7.33015	11.5407	14.3455	12.3005	14.0834	14.1432	15.3945	16.3213	4.03711	19.6514	19.1728	19.8388	23.2904
Intensity B	54.3103	62.4041	93.1491	101.878	104.207	123.2	122.395	124.023	129.127	153.588	157.121	165.645	147.824	167.567
Background 1	21.4387	20.1444	30.9602	33.1106	32.8813	39.3478	30.4257	30.4576	33.1461	41.3298	37.1414	34.4432	31.488	34.4136
Background 2	-0.153028	-0.135477	-0.221333	-0.182111	-0.191518	-0.233956	-0.192746	-0.186551	-0.186438	-0.232066	-0.208793	-0.202825	-0.172461	-0.186138
A Peak Width	2.01522	1.61391	1.40492	1.88486	2.00958	1.38836	1.39839	1.46418	1.57893	1.13559	1.50306	1.43825	1.3745	1.29981
B Peak Width	0.772741	0.734786	0.752762	0.778715	0.769251	0.740041	0.720738	0.730501	0.71689	0.799018	0.757312	0.706245	0.790697	0.704011
A Peak Centre Shift	45.858	45.1477	44.8221	45.8182	45.9827	45.0578	45.4053	44.9714	44.8336	48.7339	44.799	44.5624	44.6022	44.9214
B Peak Centre Shift	49.9434	49.532	49.5684	50.2602	50.254	49.8709	50.2155	49.947	49.5956	49.3635	49.6631	49.5346	49.6474	49.8351
225K	VBG	A and B	Lower Confidence Bands
Wavelength	690.92	692.47	694.37	696.2	698.33	700.67	702.3	704.38	706.1	708.51	710.53	712.4	714.54	716.37
Intensity A	4.10051	5.17083	8.74486	6.24448	7.03993	11.288	11.5996	13.0226	10.1084	-12.6858	16.71	16.0966	16.4574	20.243
Intensity B	52.141	60.4219	89.6818	91.8455	97.6452	119.661	119.111	120.995	121.105	143.559	153.256	161.522	143.652	163.648
Background 1	20.3637	19.1419	29.4165	28.4808	29.531	37.7548	28.9048	28.9111	29.6648	36.7447	35.1307	32.6116	29.424	32.4985
Background 2	-0.171622	-0.152533	-0.250227	-0.266539	-0.249774	-0.26439	-0.221061	-0.214039	-0.255433	-0.321931	-0.245483	-0.240035	-0.212924	-0.222632
A Peak Width	1.10523	1.02392	0.891714	0.391584	0.804279	0.971478	1.00911	1.10846	0.723969	-0.660852	1.11859	1.08614	1.01703	1.03473
B Peak Width	0.723457	0.698518	0.710249	0.664247	0.694694	0.707695	0.691332	0.703371	0.650227	0.701276	0.728639	0.67949	0.756583	0.679042
A Peak Centre Shift	45.2587	44.739	44.5047	44.9142	45.0803	44.7968	45.1664	44.7082	44.2911	47.2661	44.5692	44.3413	44.3788	44.7576
B Peak Centre Shift	49.9124	49.5086	49.5405	50.1851	50.206	49.8497	50.1962	49.9293	49.5517	49.3002	49.6445	49.517	49.6251	49.8186
225K	ORD	2A and 2B	Peakdata
Wavelength	700.51	702.41	704.42	706.33	708.45	710.52	712.36	714.44	716.3	718.4	720.3	722.42	724.25	726.38	728.41	730.35	732.38	734.43	736.33	738.15	740.47	742.3	744.41	746.27	748.38	750.19	755.09	760.29	765.32	770.18	775.09
Intensity A	3.40481	3.27101	3.58877	4.65407	2.32159	3.26013	2.20055	2.99062	2.62461	3.26087	4.77447	4.47722	4.17383	3.23587	2.71502	2.69029	2.52532e-10	0.713605	2.35441	1.89745	1.86024	1.27968	0.932241	0.659583	0.223939	0.746841	0.507234	0.335638	0.827546	0.973452	0.0579189
Intensity B	23.9268	18.6032	19.4363	18.2949	22.1187	20.8091	22.2882	22.0885	18.1693	21.5089	20.4507	23.9594	25.0087	20.1506	15.872	15.1598	13.916	13.3803	10.9489	7.68341	7.09236	4.07007	3.10219	2.02309	1.35573	2.01462	0.828894	0.812172	0.976978	1.80816	0.00602773
Background 1	16.7789	10.6535	9.46476	6.15669	13.9342	15.6131	14.4363	17.9067	14.5618	15.3708	16.7546	16.5005	19.6107	18.0715	13.3309	14.819	31.2127	31.756	11.1661	11.3653	9.82483	5.17806	3.89137	2.57936	-1.26623	3.27945	2.20779	2.93905	3.42657	5.29682	-3.45178
Background 2	0.0322044	0.0348872	0.0472809	0.0750933	0.038534	0.0209442	0.0609807	0.00270389	0.00244792	0.0121377	-0.000283257	0.0224166	0.0129028	-0.0114215	0.00223582	-0.00208055	-0.141667	-0.167289	0.00167213	0.00216875	-0.00514305	-0.000561415	-0.000591014	0.00195489	0.080511	-0.00252684	-0.00243964	-0.00385664	-0.00363629	-0.00577178	0.120584
A Peak Width	7.8966	8.47163	9.99999	10	4.21409	6.02967	4.74064	6.69119	5.49318	6.10031	6.98918	10	5.47605	3.1405	4.82911	4.01285	4.29888e-05	0.0364197	4.45365	4.19981	3.2793	3.62125	4.69467	4.14106	0.0168675	2.99994	2.03426	2.06987	2.05044	2.3106	0.00732646
B Peak Width	1.3426	1.23437	1.16925	1.34043	1.18725	1.41171	1.17466	1.24134	1.28335	1.23955	1.13608	1.31959	1.41839	1.31227	1.32503	2.08502	1.14768	1.27107	1.23876	1.406	1.36436	1.34328	1.26745	1.1343	0.23942	1.39329	1.52174	1.38588	1.63018	0.991812	0.00310749
A Peak Centre Shift	89.5369	88.9574	88.3262	86.2289	88.3283	88.0785	88.0198	89.1145	88.9515	88.6338	92	85	88.862	90.0803	89.7371	88.3958	91.9997	88.5382	88.9837	88.6368	88.6916	88.6595	89.3526	89.1074	89.1286	88.9412	89.2335	89.1464	88.6308	88.9987	87.917
B Peak Centre Shift	99.353	98.979	99.1503	98.5511	98.5558	98.5293	98.5382	98.7301	98.3844	98.5749	98.5483	98.5327	98.6944	99.3451	99.2298	99.6396	98.9697	98.8534	98.6573	98.6075	98.6994	98.8321	98.7635	98.5542	98.9744	98.8276	99.4778	99.2633	98.5665	98.6065	96.6696
225K	ORD	2A and 2B	Upper Confidence Bands
Wavelength	700.51	702.41	704.42	706.33	708.45	710.52	712.36	714.44	716.3	718.4	720.3	722.42	724.25	726.38	728.41	730.35	732.38	734.43	736.33	738.15	740.47	742.3	744.41	746.27	748.38	750.19	755.09	760.29	765.32	770.18	775.09
Intensity A	3.96326	3.80974	4.52548	5.34048	4.59152	3.68731	8.89638	3.30642	2.94507	3.6088	5.67082	7.13196	4.5315	4.08115	2.99442	4.47711	NaN	368.3	2.61901	2.12076	2.10089	1.46424	1.0822	0.813461	20463	0.943489	0.69815	0.509342	1.01369	1.22796	6.56646e+06
Intensity B	24.8487	19.3459	20.2496	19.0526	26.1691	21.5196	34.1169	22.7246	18.7788	22.1573	22.3012	26.8545	25.6618	21.4383	16.3898	17.5742	NaN	27.4731	11.4357	8.05827	7.45785	4.3657	3.38117	2.30478	19.048	2.29838	1.04865	1.0232	1.18525	2.18844	3.13216e+07
Background 1	18.4811	12.3795	12.3978	7.89664	18.5873	16.8886	31.9967	18.7545	15.358	16.3823	18.4073	24.8283	20.4771	19.2213	13.855	18.0383	NaN	43.9255	11.6384	11.7683	10.172	5.46462	4.16579	2.90911	4.97527	3.58702	2.45477	3.18563	3.69015	5.70098	7.91068
Background 2	0.0453814	0.0480358	0.0690788	0.0893451	0.0793523	0.0314643	0.209407	0.00982262	0.00932682	0.0206045	0.0146997	0.0877455	0.0205931	0.000619704	0.00737605	0.0296877	NaN	-0.0312015	0.00652141	0.00625522	-0.001129	0.00267388	0.00238346	0.00507067	0.148538	0.000730427	0.000475604	-0.000710031	-0.000420987	-0.000492133	0.252227
A Peak Width	11.1157	11.55	14.341	NaN	12.6912	7.91429	35.9964	8.50754	7.11421	7.69254	10.0503	20.7518	6.59367	4.61037	5.9077	9.27597	NaN	27.8065	5.47681	5.1916	4.03326	4.57858	6.28516	6.13926	797.874	4.40622	3.27818	3.83574	2.80625	3.34148	417246
B Peak Width	1.43912	1.32614	1.2606	1.43605	1.5317	1.49445	2.1698	1.30497	1.35746	1.30382	1.33906	1.59747	1.48239	1.44765	1.39832	2.65828	NaN	3.37109	1.32998	1.52017	1.48063	1.50455	1.46136	1.38979	4.76638	1.71223	2.20061	2.01474	2.23474	1.34784	8.08012e+06
A Peak Centre Shift	90.7105	89.9526	89.4934	87.0939	92.4842	88.831	101.886	89.8741	89.6705	89.2828	93.7421	88.4123	89.3674	90.9173	90.2753	91.1576	NaN	275.41	89.5092	89.1517	89.1195	89.1889	90.1592	90.1024	1193.94	89.7393	89.9974	90.2067	89.0905	89.5918	15292.5
B Peak Centre Shift	99.4036	99.0272	99.198	98.6066	98.7749	98.5781	99.1669	98.7658	98.4279	98.6125	98.644	98.6921	98.732	99.4298	99.2736	99.9794	100.039	100.192	98.713	98.6771	98.7702	98.9305	98.8791	98.7137	101.725	99.0253	99.8813	99.6215	98.9137	98.8144	191514
225K	ORD	2A and 2B	Lower Confidence Bands
Wavelength	700.51	702.41	704.42	706.33	708.45	710.52	712.36	714.44	716.3	718.4	720.3	722.42	724.25	726.38	728.41	730.35	732.38	734.43	736.33	738.15	740.47	742.3	744.41	746.27	748.38	750.19	755.09	760.29	765.32	770.18	775.09
Intensity A	2.84635	2.73228	2.65206	3.96767	0.0516686	2.83296	-4.49528	2.67481	2.30416	2.91294	3.87811	1.82247	3.81616	2.39059	2.43563	0.903474	NaN	-366.873	2.0898	1.67413	1.61958	1.09513	0.78228	0.505706	-20462.5	0.550192	0.316318	0.161935	0.641399	0.718948	-6.56646e+06
Intensity B	23.005	17.8604	18.623	17.5372	18.0682	20.0986	10.4595	21.4524	17.5597	20.8606	18.6003	21.0644	24.3556	18.8629	15.3543	12.7455	NaN	-0.712552	10.4621	7.30855	6.72687	3.77445	2.82322	1.74139	-16.3365	1.73087	0.609135	0.601146	0.768709	1.42788	-3.13216e+07
Background 1	15.0768	8.92755	6.53175	4.41675	9.28112	14.3375	-3.12403	17.0589	13.7656	14.3593	15.1019	8.17265	18.7442	16.9218	12.8069	11.5997	NaN	19.5865	10.6939	10.9622	9.47766	4.89149	3.61694	2.24961	-7.50773	2.97187	1.96082	2.69246	3.16299	4.89265	-14.8142
Background 2	0.0190274	0.0217386	0.025483	0.0608415	-0.00228417	0.0104241	-0.0874455	-0.00441483	-0.00443098	0.00367079	-0.0152662	-0.0429123	0.00521245	-0.0234627	-0.0029044	-0.0338488	NaN	-0.303377	-0.00317716	-0.00191771	-0.0091571	-0.00379671	-0.00356549	-0.0011609	0.012484	-0.0057841	-0.00535489	-0.00700324	-0.00685159	-0.0110514	-0.0110593
A Peak Width	4.67752	5.39323	5.65897	NaN	-4.26303	4.14505	-26.5152	4.87483	3.87215	4.50808	3.92805	-0.751761	4.35842	1.67063	3.75052	-1.25027	NaN	-27.7337	3.4305	3.20802	2.52533	2.66392	3.10418	2.14287	-797.841	1.59367	0.790352	0.304011	1.29464	1.27971	-417246
B Peak Width	1.24608	1.1426	1.0779	1.24481	0.842798	1.32898	0.179507	1.1777	1.20924	1.17529	0.9331	1.04171	1.3544	1.17689	1.25174	1.51175	NaN	-0.828945	1.14754	1.29183	1.24809	1.182	1.07353	0.878806	-4.28754	1.07435	0.842864	0.757027	1.02563	0.635781	-8.08012e+06
A Peak Centre Shift	88.3634	87.9622	87.159	85.364	84.1723	87.326	74.1541	88.355	88.2326	87.9849	90.2579	81.5877	88.3566	89.2434	89.1989	85.6341	NaN	-98.3339	88.4581	88.122	88.2636	88.1301	88.546	88.1123	-1015.68	88.1431	88.4697	88.086	88.1712	88.4056	-15116.7
B Peak Centre Shift	99.3024	98.9308	99.1026	98.4956	98.3367	98.4806	97.9095	98.6944	98.341	98.5373	98.4527	98.3734	98.6569	99.2604	99.186	99.2999	97.9	97.5149	98.6016	98.538	98.6285	98.7336	98.648	98.3948	96.2239	98.6299	99.0743	98.905	98.2193	98.3986	-191321
225K	VBG	2A and 2B	PeakData
Wavelength	690.92	692.47	694.37	696.2	698.33	700.67	702.3	704.38	706.1	708.51	710.53	712.4	714.54	716.37
Intensity A	3.02108	4.21665	3.56533	3.96422	4.66605	3.7204	4.1127	4.53006	3.79774	4.61568	5.18913	4.43034	4.76771	3.61754
Intensity B	11.5603	13.3705	19.7459	20.4555	21.8117	26.2068	24.9715	24.7664	24.816	29.4163	31.0928	31.2468	29.021	29.9354
Background 1	2.14629	-0.978892	4.59275	6.98646	5.48331	18.5533	10.4289	9.54829	13.533	15.9724	12.8923	17.1458	16.1376	22.6653
Background 2	0.0627807	0.0878165	0.0891377	0.0663558	0.0845366	0.0275805	0.0459483	0.0564931	0.0195489	0.0335338	0.0772858	0.0141232	0.0157192	-0.0175613
A Peak Width	10	10	10	9.4739	10	6.17874	7.47021	7.58735	6.02823	7.57116	6.89627	6.58613	5.2749	3.69544
B Peak Width	1.28766	1.33962	1.1944	1.25513	1.28451	1.18241	1.19137	1.20366	1.22022	1.19362	1.23954	1.1456	1.22771	1.21479
A Peak Centre Shift	87.5688	86.054	86.7982	89.1441	87.9333	89.3358	89.8508	89.0637	89.4274	89.3128	88.4845	89.7717	89.5157	89.4421
B Peak Centre Shift	99.1929	98.8831	98.8815	99.6129	99.4981	99.1531	99.5766	99.2479	98.9378	98.6802	98.9501	98.8493	98.9889	99.0612
225K	VBG	2A and 2B	Upper Confidence Bands
Wavelength	690.92	692.47	694.37	696.2	698.33	700.67	702.3	704.38	706.1	708.51	710.53	712.4	714.54	716.37
Intensity A	3.56458	4.81235	8.78502	4.91199	6.06959	4.1196	4.59983	5.17748	4.12513	5.10001	8.09623	4.79497	5.1394	5.59081
Intensity B	12.2228	14.0052	24.1653	21.4084	22.7967	26.9846	25.8224	25.7195	25.4784	30.2987	36.0543	32.0415	29.7499	33.2789
Background 1	3.46828	0.477347	20.7433	9.97246	9.85062	19.6558	11.9523	11.6985	14.3433	17.4327	22.1142	18.0285	16.9596	26.118
Background 2	0.0733545	0.0993919	0.209971	0.0884333	0.116945	0.0365807	0.0578325	0.0731991	0.026401	0.0450789	0.151595	0.0216955	0.0229947	0.0140909
A Peak Width	NaN	NaN	33.632	13.6832	14.5879	7.81221	9.6513	10.047	7.31857	9.57305	16.1323	7.98333	6.22921	7.62915
B Peak Width	1.41468	1.44881	1.67407	1.36559	1.39195	1.2427	1.26495	1.28666	1.2768	1.25964	1.58304	1.19763	1.27991	1.43038
A Peak Centre Shift	88.6961	86.8089	93.1594	90.3253	89.0814	90.0048	90.6433	89.8817	89.99	90.0697	91.9125	90.3881	89.9593	91.5024
B Peak Centre Shift	99.2668	98.9467	99.1463	99.6696	99.555	99.1883	99.6167	99.2939	98.9705	98.7154	99.1487	98.8783	99.02	99.1981
225K	VBG	2A and 2B	Lower Confidence Bands
Wavelength	690.92	692.47	694.37	696.2	698.33	700.67	702.3	704.38	706.1	708.51	710.53	712.4	714.54	716.37
Intensity A	2.47759	3.62095	-1.65436	3.01645	3.26251	3.32119	3.62557	3.88264	3.47036	4.13134	2.28204	4.06571	4.39601	1.64427	6.88682	7.39134	6.67455	5.62399	4.30883	5.22453	5.24411	4.46702	3.79084	3.60818	2.40314	2.73889	2.53456	-52000.1	-6.1441
Intensity B	10.8978	12.7358	15.3266	19.5026	20.8268	25.4289	24.1206	23.8132	24.1536	28.534	26.1313	30.4521	28.2921	26.5919	21.8596	21.4313	20.317	16.2559	9.85763	10.3947	11.5033	8.85959	6.57948	5.53883	3.46757	4.10583	2.66643	-2.85642e+07	-2.35992e+07
Background 1	0.824305	-2.43513	-11.5578	4.00047	1.116	17.4507	8.9055	7.39805	12.7226	14.5121	3.67033	16.2632	15.3157	19.2125	10.7924	11.9532	12.7489	9.92383	6.93637	8.96313	10.3341	9.43309	6.85306	7.28326	6.82145	6.83453	15.3955	-13.813	-4.58016
Background 2	0.0522068	0.0762411	-0.031695	0.0442783	0.0521283	0.0185802	0.0340642	0.0397871	0.0126967	0.0219887	0.00297637	0.00655084	0.0084437	-0.0492136	0.00787741	0.0113615	0.0140119	0.0125619	-0.00997197	-0.00308488	0.00268568	-0.00564794	0.00124592	-0.00372901	-0.017983	-0.0103175	-0.14683	0.0527947	-0.0140227
A Peak Width	NaN	NaN	-13.632	5.26463	5.4121	4.54526	5.28912	5.12772	4.73788	5.56927	-2.33978	5.18894	4.32059	-0.238279	2.64402	2.9544	2.75999	2.01731	3.04774	2.21874	2.76452	2.49023	2.34164	2.43594	1.88594	2.19597	1.53895	-10453	-5.75878
B Peak Width	1.16063	1.23043	0.714741	1.14467	1.17708	1.12211	1.11779	1.12066	1.16363	1.1276	0.89604	1.09357	1.17551	0.999208	1.117	1.21446	1.11486	1.00852	0.651264	1.41666	1.10123	1.25163	1.08341	1.34185	1.01054	1.00767	5.57077	-4.88482e+06	-8.10129e+07
A Peak Centre Shift	86.4414	85.299	80.4371	87.9628	86.7851	88.6667	89.0584	88.2457	88.8647	88.556	85.0565	89.1553	89.0722	87.3818	90.2279	89.9696	89.0654	89.1797	89.552	88.9467	89.3075	89.2513	89.3134	89.2293	89.197	89.3708	89.2211	-576.572	85.5303
B Peak Centre Shift	99.1191	98.8195	98.6167	99.5562	99.4412	99.1178	99.5364	99.2019	98.9051	98.645	98.7516	98.8203	98.9577	98.9244	100.363	100.156	99.5137	99.5861	99.2475	99.4266	99.5486	99.5272	99.5677	99.3931	99.579	99.4226	100.206	-34284.7	-2.82213e+07
